1 **Asymmetrical localization of components of the Nup107-160 subcomplex within**  
2 **the nuclear pore complex in fission yeast**

3

4 Haruhiko Asakawa<sup>1</sup>, Tomoko Kojidani<sup>2,3</sup>, Hui-Ju Yang<sup>1</sup>, Chizuru Ohtsuki<sup>1</sup>, Hiroko  
5 Osakada<sup>2</sup>, Masaaki Iwamoto<sup>2</sup>, Naomi Takagi<sup>4</sup>, Koji Nagao<sup>4,5</sup>, Chikashi Obuse<sup>4,5</sup>,  
6 \*Yasushi Hiraoka<sup>1,2</sup> & \*Tokuko Haraguchi<sup>1,2</sup>

7

8 1 Graduate School of Frontier Biosciences, Osaka University, Suita, Japan

9 2 Advanced ICT Research Institute Kobe, National Institute of Information and

10 Communications Technology, Kobe, Japan

11 3 Department of Chemical and Biological Sciences, Faculty of Science, Japan Women's

12 University, Tokyo, Japan

13 4 Graduate School of Life Science, Hokkaido University, Sapporo, Japan.

14 5 Graduate School of Science, Osaka University, Toyonaka, Japan.

15

16 \*Corresponding authors:

17 Tokuko Haraguchi

18 e-mail: tokuko@nict.go.jp

19 Yasushi Hiraoka

20 e-mail: hiraoka@fbs.osaka-u.ac.jp

21

22 **Abstract**

23 The nuclear pore complex (NPC) forms a gateway for nucleocytoplasmic transport. The  
24 NPC consists of several protein subcomplexes. Nup107-160 is a key subcomplex  
25 responsible for building the basal NPC structure by symmetrical localization on the  
26 nuclear and cytoplasmic sides of the nuclear pore. Here we found an unusual  
27 asymmetrical localization of the Nup107-160 subcomplex in fission yeast. Two  
28 disconnected/split pieces of the Nup107-160 subcomplex were differentially distributed  
29 to either side of the NPC, as revealed by immunoelectron microscopy and  
30 affinity-capture/mass spectrometry for nucleoporins. Nup131 and Nup132 (paralogs of  
31 human Nup133) were differentially localized on the cytoplasmic and nuclear sides,  
32 respectively. The expression of a fusion protein connecting the disrupted components of  
33 the Nup107-160 subcomplex caused symmetrical localization of Nup132, leading to  
34 defects in mitosis and meiosis. These observations suggest that the asymmetrical NPC  
35 structure is necessary for normal cell cycle progression in fission yeast.

36

37

38 **Keywords:** nuclear pore complex, nucleoporin, Nup133, Y-complex, immunoelectron  
39 microscopy, mass spectrometry

40

41

42

## 43 **Introduction**

44 In eukaryotes, the nuclear envelope (NE) separates the nucleus from the cytoplasm.  
45 Molecular transport between the nucleus and cytoplasm across the NE occurs through  
46 nuclear pore complexes (NPCs). These complexes are cylindrical, eight-fold  
47 symmetrical structures that perforate the NE and are made of multiple sets of about 30  
48 different protein species known as nucleoporins (Nups) (Rout et al., 2000; Cronshaw et  
49 al., 2002; Alber et al., 2007). Nups are classified into three groups: transmembrane  
50 Nups, FG repeat Nups, and scaffold Nups. Transmembrane Nups have transmembrane  
51 motifs and anchor NPCs to the NE. FG repeat Nups contain phenylalanine-glycine (FG)  
52 rich repeats and are involved in molecular transport inside the NPC cylinder structure.  
53 Scaffold Nups form two inner rings and two outer rings, which serve as the NPC  
54 structural core, and associate with the membrane through interactions with  
55 transmembrane Nups (Bui et al., 2013; von Appen et al., 2015; Kosinski et al., 2016;  
56 Lin et al., 2016). These NPC structures and most nucleoporins are conserved among  
57 many eukaryotes (Rout et al., 2000; Cronshaw et al., 2002; DeGrasse et al., 2009;  
58 Tamura et al., 2010; Amlacher et al., 2011; Obado et al., 2016), although numerous  
59 species-dependent differences are found (Knockenbauer and Schwartz, 2016).

60 The Nup107-160 subcomplex is a key component of the outer rings and is  
61 composed of Nup107, Nup85, Nup96, Nup160, Nup133, Sec13, and Seh1 in most  
62 eukaryotes; depending on the species, Nup37, Nup43, and ELYS are also included  
63 (Walther et al., 2003; Harel et al., 2003; Loiodice et al., 2004; Rasala et al., 2006; Liu et  
64 al., 2009; Thierbach et al., 2013). These nucleoporins assemble to form the Y-shaped  
65 Nup107-160 subcomplex *in vitro* and/or *in vivo* in *Homo sapiens*, the budding yeast  
66 *Saccharomyces cerevisiae*, and the thermophile *Chaetomium thermophilum* (von Appen

67 et al., 2015; Thierbach et al., 2013; Kampmann and Blobel, 2009; Flemming et al.,  
68 2010; Fernandez-Martinez et al., 2012; Kelley et al., 2015; Stuwe et al., 2015). Nup85,  
69 Nup43, and Seh1 form one of the two short arms, while Nup160, Nup37, and ELYS  
70 form the other. The two arms are connected to Nup96 and Sec13, creating the  
71 three-pronged structure. Nup96 is connected to Nup107 and Nup133 to form the long  
72 stem (Nup96-Nup107-Nup133) of the Y-shaped molecule. Multiple copies of the  
73 Nup107-160 subcomplex form the outer rings on the nucleoplasmic and cytoplasmic  
74 sides of the NPC (Bui et al., 2013; von Appen et al., 2015; Kelley et al., 2015; Stuwe et  
75 al., 2015).

76 Like other eukaryotes, the fission yeast *Schizosaccharomyces pombe* has a set of  
77 conserved Nups (Baï et al., 2004; Chen et al., 2004; Asakawa et al., 2014). The *S.*  
78 *pombe* NPC contains spNup37 and spEly5, a potential homolog of metazoan ELYS, but  
79 not Nup43 (Asakawa et al., 2014; Bilokapic and Schwartz, 2012) (hereafter, we add the  
80 prefix ‘sp’ to denote *S. pombe* proteins). In addition, *S. pombe* carries several redundant  
81 Nups: two Nup133 and two scNic96/hsNup93 homologs, each (hereafter, sc and hs are  
82 used to indicate *S. cerevisiae* and *H. sapiens* proteins). The two Nup133 homologs in *S.*  
83 *pombe*, spNup131 (spNup133a) and spNup132 (spNup133b), are able to interact  
84 biochemically with spNup107 (Baï et al., 2004). Despite their similar biochemical  
85 features, spNup131 and spNup132 are likely to have different functions because gene  
86 disruption strains show different phenotypes; *nup132Δ* but not *Nup131Δ* display altered  
87 NPC distribution (Baï et al., 2004), and the strain lacking spNup132 (*nup132Δ*) but not  
88 that lacking spNup131 (*nup131Δ*) is inhibited for growth in the presence of a  
89 microtubule-depolymerizing drug (thiabendazole) or a DNA replication inhibitor  
90 (hydroxyurea) (Chen et al., 2004; Asakawa et al., 2014). In meiosis, *nup132Δ* but not

91 *nup131* $\Delta$  exhibits delayed chromosome segregation and unusual spore formation  
92 (Asakawa et al., 2014; Yang et al., 2015). In addition, telomere elongation and  
93 deficiency in SUMOylation have been reported in *nup132* $\Delta$ -specific phenotypes (Liu et  
94 al., 2010; Nie and Boddy, 2015). The causes of these functional differences remain  
95 unknown.

96 In the present study, we used immunoelectron microscopy to determine the  
97 localization of each Nup in *S. pombe* NPCs. To understand the overall structure of the *S.*  
98 *pombe* NPC, we performed interactome studies of Nups using affinity capture and mass  
99 spectrometry. Our results reveal a unique structure for the *S. pombe* Nup107-160  
100 subcomplex and suggest that a variation in NPC organization developed during  
101 evolution.

102

## 103 **Results**

### 104 **spNup131 and spNup132 are differently positioned at the cytoplasmic and** 105 **nucleoplasmic sides of the NPC**

106 The molecular architectures of spNup131 and spNup132 are similar, with an N-terminal  
107  $\beta$ -propeller domain followed by a C-terminal  $\alpha$ -helix stack domain in the C-terminus, as  
108 found in other species (Whittle and Schwartz, 2009) (**Figure 1a**). However,  
109 phylogenetic analysis indicates that spNup131 and spNup132 belong to evolutionarily  
110 distant clades, with the spNup131-containing clade branching from a common ancestor  
111 much earlier than that of spNup132 (**Figure 1–figure supplement 1**). This result  
112 suggests that despite the similarity in their domain architecture, spNup131 and  
113 spNup132 may have structural features that are distinct enough to confer different  
114 functions.

115 To investigate the differences between spNup131 and spNup132, we first  
116 determined the localization of these Nups within the NPC using  
117 immunoelectronmicroscopy (IEM) (see Materials and Methods for details). The  
118 spNup131 or spNup132 gene was replaced with the respective gene N-terminally fused  
119 to GFP (GFP-spNup131 or GFP-spNup132). The results showed that GFP-spNup131 is  
120 located at the cytoplasmic side of the NPC, while GFP-spNup132 is located at the  
121 nuclear side (**Figure 1b**). To confirm the accessibility of the nucleus to immunogold  
122 particles using this method, the nuclear centromere protein spMis6 (Saitoh et al., 1997)  
123 was co-stained (**Figure 1–figure supplement 2**); only the cells positive for spMis6  
124 were evaluated for staining of spNup131. IEM to detect GFP-spNup131 in cells  
125 simultaneously expressing spMis6-GFP showed that spNup131 is localized only at the  
126 cytoplasmic side of the NPC (**Figure 1–figure supplement 2**). Montage pictures with  
127 quantification show the distribution of spNup131 and spNup132 and confirm the  
128 distinct locations of spNup131 and spNup132 in the NPC; spNup131 and spNup132  
129 were exclusively located in the cytoplasmic and nuclear, respectively (**Figure 1c**,  
130 **Figure 1–figure supplement 2**). To consider potential artifacts of GFP-tagging at the  
131 N-terminus, we repeated these experiments using strains in which spNup131 or  
132 spNup132 was C-terminally fused to GFP and obtained essentially the same results  
133 (**Figure 1d**). These results indicate that spNup131 and spNup132 are differentially  
134 positioned at the cytoplasmic and nuclear sides, respectively, of the NPC.

135

### 136 **Immunoelectron microscopy of spNup107-160 subcomplex Nups**

137 Because the Nup133 homologs are integrated components of the Nup107-160  
138 subcomplex, we next examined positioning of the other Nup107-160 subcomplex

139 components in *S. pombe*: spNup107 (scNup84/hsNup107), spNup120  
140 (scNup120/hsNup160), spNup85 (scNup85/hsNup85), spNup96 (also known as  
141 spNup189C; scNup146C/hsNup96), spNup37 (hsNup37), spSeh1 (scSeh1/hsSeh1), and  
142 spEly5 (hsELYS) in the cells expressing each GFP-fused Nup as a sole component. The  
143 spNup98-spNup96 fusion protein is generated as the *nup189<sup>+</sup>* gene product, and  
144 spNup96 is separated by the peptides conferring autopeptidase activity in the  
145 C-terminus of spNup98 (also known as spNup189N) (Asakawa et al., 2015). The  
146 C-terminal tag on spNup96 does not inhibit separation of spNup98 from spNup96  
147 (Asakawa et al., 2015).

148 Results of IEM show that of the 7 nucleoporins, spNup107 is located on the  
149 nuclear side of the NPC, whereas spNup120, spNup85, spNup96, spNup37, spEly5, and  
150 spSeh1 are predominantly located on the cytoplasmic side of the NPC (**Figure 2a**). The  
151 localization of spNup107 on the nuclear side was also confirmed using an N-terminus  
152 fusion protein (**Figure 2a**). Simultaneous detection of spMis6-GFP further confirmed  
153 the localization of spNup120, spNup96, spNup85, spNup37, spSeh1, and spEly5 on the  
154 cytoplasmic side (**Figure 2a**). This result suggests that the Nup107-160 subcomplex is  
155 disrupted into two pieces in *S. pombe* and that these two pieces are differentially located  
156 on the cytoplasmic and nuclear sides of the NPC.

157

### 158 **Location of other Nups in the NPC**

159 We also performed IEM of other Nups to reveal their locations within the NPC in *S.*  
160 *pombe* (**Figure 2b-f**). We first examined inner ring Nups known as the Nup93  
161 subcomplex in vertebrates. spNup97 and spNpp106, redundant *S. pombe* homologs of  
162 scNic96/hsNup93, were both similarly positioned near the center of the NPC. spNup184

163 (scNup188/hsNup188) and spNup186 (scNup192/hsNup205) were also positioned near  
164 the center (**Figure 2b**). The redundancy of scNic96/hsNup93 homologs is unique in the  
165 *Schizosaccharomyces* genus (**Figure 2–figure supplement 1**). spNup40 and spNup155  
166 were also located near the center of the NPC, but they showed a slightly broader range  
167 of localization (**Figure 2b**).

168           The channel Nups spNup44 (scNup57/hsNup54) and spNup45  
169 (scNup49/hsNup58) were localized at the center of the pore (**Figure 2c**). spNup98  
170 (scNup145n/hsNup98) was also found near the center of the pores when examined with  
171 an antibody against the N-terminal region (Iwamoto et al., 2013) (see “spNup98” in  
172 **Figure 2c**). The C-terminal region of spNup98 tagged with GFP was detected on the  
173 cytoplasmic side of the nuclear pore using an anti-GFP antibody (see “spNup98-GFP”  
174 in **Figure 2c**). In *H. sapiens* and *S. cerevisiae*, the C-terminal region of the Nup98  
175 homologs (hsNup98/scNup145n/scNup100/scNup116) interacts with Nup96 homologs  
176 (hsNup96/scNup145c) (Hodel et al., 2002; Griffis et al., 2003; Ratner et al., 2007). In  
177 addition, the C-terminal mouse Nup98-APD (autoproteolytic and NPC-targeting  
178 domain) binds the conserved cytoplasmic scNup82 (Stuwe et al., 2012). Thus, the  
179 C-terminal region of spNup98 might be tethered by spNup96 and spNup82, both of  
180 which are positioned at the cytoplasmic side of the NPC, while the N-terminal region is  
181 extended to the center of the pore. *S. pombe* homologs of the conserved Nup Nsp1  
182 (scNsp1/hsNup62) was localized frequently in the cytoplasmic side and infrequently in  
183 the nuclear side of the NPC (**Figure 2d**). The conserved cytoplasmic Nups spNup82  
184 (scNup82/hsNup88) and spNup146 (scNup159/hsNup214) also localized to the  
185 cytoplasmic side (**Figure 2e**). The conserved nuclear Nups spNup61 (scNup2/hsNup50),  
186 spNup124 (scNup1/hsNup153), spNup211 (scMlp1/scMlp2/hsTpr), and spNup60



187 (scNup60) were localized at the nuclear side (**Figure 2f**). The transmembrane Nups  
188 spCut11 (scNdc1/hsNdc1), spPom152 (scPom152), and spPom34 (scPom34) were  
189 localized at the center of the pore and slightly biased toward the cytoplasm (**Figure 2g**).

190

### 191 **Interaction mapping of *S. pombe* Nups**

192 To understand the overall structure of the *S. pombe* NPC, which is likely assembled  
193 with the unusual characteristics as described above, we performed affinity capture/mass  
194 spectrometry of *S. pombe* nucleoporins. Whole cell extracts were prepared from *S.*  
195 *pombe* strains expressing each of the GFP-fused nucleoporins from the endogenous  
196 genomic locus and subjected to immunoprecipitation with anti-GFP antibodies (see  
197 Materials and Methods for details). Proteins precipitated with GFP-nucleoporins were  
198 separated on SDS polyacrylamide gels and analyzed by liquid chromatography coupled  
199 to tandem mass spectrometry (LC/MS/MS) (**Figure 3–figure supplement 1**). The  
200 abundance of immunoprecipitated nucleoporins was semi-quantified using emPAI  
201 (exponentially modified protein abundance index) values (Ishihama et al., 2005),  
202 yielding a map of the interactions between *S. pombe* nucleoporins (**Figure 3**).

203 We first focused on proteins interacting with components of the Nup107-160  
204 subcomplex. spNup107 co-precipitated with spNup132 and vice versa, which is  
205 consistent with the previous study (Bai et al, 2004), suggesting that they form a  
206 complex *in vivo* in analogy to eukaryotic homologs (e.g., scNup84-133 and  
207 hsNup107-133). However, in contrast to studies in humans and *S. cerevisiae*, spNup107  
208 did not effectively interact with spNup96, a result consistent with IEM data showing  
209 separate locations of spNup107 and spNup96 at the nuclear and cytoplasmic sides of the  
210 NPC, respectively. spNup107 co-precipitated spNup131, suggesting these proteins

211 interact with each other only when they are together in cell extracts, as the IEM data  
212 showed that spNup107 and spNup131 were located on different sides of the NPC.  
213 Because immunoprecipitation does not ensure direct interaction between the two  
214 components, we performed yeast two-hybrid assays to investigate the direct binding  
215 ability between any two components of the Nup107-160 subcomplex. spNup107 bound  
216 spNup132 but not spNup131 (**Figure 4a**), consistent with IEM data indicating that  
217 spNup107 and spNup132 but not spNup131 are located on the nuclear side of the NPC.  
218 No or minimal interaction was detected between spNup107 and spNup96 (**Figure 4a**),  
219 suggesting a separation between spNup107 and spNup96, as found in IEM and affinity  
220 capture/mass spectrometry analyses. spNup96 bound to spNup85 (**Figure 4a**); spNup96  
221 bound to spNup120 in the presence of spNup85 (**Figure 4b**); spSeh1 bound to spNup85  
222 (**Figure 4c**); spNup37 bound to spNup120 (**Figure 4c**); spEly5 bound to spNup120 in  
223 the presence of spNup37 but not in the absence of spNup37 (**Figure 4d**); and spNup37  
224 and spEly5 did not interact with each other (**Figure 4e**). These results suggest that  
225 spNup120–spNup37–spEly5, spNup85–spSeh1, and spNup96 form a complex, as  
226 suggested by IEM and affinity capture/mass spectrometry analyses in this study and  
227 previous studies (Bilokapic et al., 2012). The Nup37-dependent interaction of ELYS  
228 with Nup120 is also reported for *C. thermophilum* (Thierbach et al., 2013). These  
229 results support the idea that in the Nup107-160 subcomplex, the protein complex  
230 containing spNup96 and the other complex containing spNup107 are in separate  
231 locations in *S. pombe*, as indicated by IEM.

232 Interaction and/or complex formation between other Nups was also examined  
233 by LC/MS/MS analysis of affinity-captured Nups. The results suggest a modular  
234 organization of *S. pombe* NPC subcomplexes, including the Nup93 subcomplex

235 (spNup97, spNpp106, spNup184, spNup186, spNup155, and spNup40), channel Nup  
236 subcomplex (spNup45, spNup44 and spNsp1), cytoplasmic ring complex (spNsp1,  
237 spNup82 and spNup146), nuclear basket Nups (spNup211, spNup60, spNup61, and  
238 spNup124) and transmembrane Nups (spCut11, spPom152, and spPom34) (**Figure 3**).  
239 In the *S. pombe* Nup93 subcomplex, the redundant Nups spNpp106 and spNup97  
240 showed different affinities toward spNup184 and spNup186: spNup97 preferentially  
241 interacted with spNup186, while spNpp106 preferentially interacted with spNup184  
242 (**Figure 3**). The Nup93 subcomplex Nups interacted with channel Nups, and vice versa  
243 (**Figure 3**). Because an interaction of the Nup93 subcomplex and the channel Nup  
244 complex has been reported previously in *S. cerevisiae* and *C. thermophilum* (Amlacher  
245 et al., 2011; Stuwe et al., 2015; Fischer et al., 2015), our result suggests that the  
246 interaction between these two subcomplexes is also conserved in *S. pombe*. In addition  
247 to the interaction with the channel Nups subcomplex, the Nup93 subcomplex interacts  
248 with transmembrane Nups (**Figure 3**). Interestingly, spNup155 in the Nup93  
249 subcomplex co-precipitated many Nups, including some of the Nup107-160  
250 subcomplex Nups, channel Nup spNup44, and transmembrane Nups, suggesting that  
251 spNup155 may play a role in connecting many subcomplexes/modules of the NPC in *S.*  
252 *pombe* (**Figure 3**). Taken together, these results suggest that the *S. pombe* NPC exhibits  
253 a split organization of the Nup107-160 subcomplex, and this unique structure may be  
254 maintained by evolutionarily conserved subcomplexes and their mutual interactions.

255 The position of each subcomplex and Nup within the NPC in *S. pombe* was  
256 summarized based on the results from immunoelectron microscopy, affinity  
257 capture/mass spectrometry, and yeast two-hybrid assays in **Figure 5**.

258

259 **The N-terminal  $\beta$ -propeller region is required for differential localization of**

260 **Nup133 homologs**

261 Next, we sought to determine which domains of spNup131 and spNup132 are  
262 responsible for their different localizations. In this experiment, we expressed fragments  
263 of spNup131 or spNup132 in a *nup131 $\Delta$  nup132 $\Delta$*  double-deletion strain (lacking genes  
264 for spNup131 and spNup132) to exclude the possibility that endogenous spNup131 or  
265 spNup132 predominantly occupies preferable sites for spNup131 and spNup132  
266 fragments (**Figure 6a**). In the background of *nup131 $\Delta$  nup132 $\Delta$* , the full-length  
267 spNup131 (spNup131FL) and spNup132 (spNup132FL) proteins tagged with GFP were  
268 localized at the nuclear periphery by fluorescence microscopy (FM) (**Figure 6b**). IEM  
269 revealed that GFP-spNup131 was localized at the cytoplasmic side of the NPC, while  
270 GFP-spNup132 localized at the nuclear side, consistent with the wild type strain  
271 (**Figure 6c**). This result suggests that spNup131 and spNup132 were localized to their  
272 proper sites independent of each other, and that they cannot substitute for one another.  
273 FM analysis revealed that the C-terminal region (spNup132C) but not the N-terminal  
274 region (spNup132N) was localized to the nuclear periphery (**Figure 6b**). IEM analysis  
275 revealed localization of spNup132C on the nuclear side of the NPC (**Figure 6c**). The  
276 spNup131 C-terminal region (spNup131C) but not the N-terminal region (spNup131N)  
277 was localized at the nuclear periphery, as with spNup132. However, surprisingly, IEM  
278 analysis revealed that spNup131C is positioned at the nuclear side of the NPC, in  
279 contrast to the full-length protein, which localized on the cytoplasmic side. This  
280 indicates that the N-terminal  $\beta$ -propeller domain of spNup131 is required for the proper  
281 localization of this protein to the cytoplasmic side.

282 To understand which domains of spNup131 and spNup132 are responsible for

283 their interactions with spNup107, we carried out yeast two-hybrid assays (**Figure 6d**).  
284 The results showed that the C-terminal region of spNup131 but not the full-length  
285 protein bound to spNup107 (**Figure 6d**). In contrast, both the spNup132 C-terminal  
286 region and the full-length protein bound to spNup107 (**Figure 6d**). Thus, these results  
287 suggest that the C-terminal regions of both spNup131 and spNup132 have the potential  
288 to interact with spNup107 and that the N-terminal region of spNup131 plays a role in  
289 preventing interaction with spNup107. Taken together, we conclude that the N-terminal  
290 region of spNup131 is necessary but not sufficient for the cytoplasmic localization of  
291 spNup131.

292

### 293 **Forced symmetrical localization of spNup132 causes defects in normal cell cycle** 294 **progression**

295 To address the significance of the separation of the *S. pombe* Nup107-160 subcomplex,  
296 we generated an *S. pombe* strain with spNup96 artificially fused to spNup107 in the  
297 *nup107Δ* background (spNup96-spNup107-GFP). The strain was viable, and Western  
298 blot analysis confirmed expression of the protein with the predicted molecular weight  
299 (**Figure 7a**). By IEM, the majority of the spNup96-spNup107-GFP fusion protein  
300 molecules were localized at the cytoplasmic side of the NPC (**Figure 7b**), a change in  
301 the location of spNup107 from the nuclear side to the cytoplasmic side. Under this  
302 condition, spNup132 was recruited to both the nuclear and cytoplasmic sides of the  
303 NPC (**Figure 7c**), suggesting that a fraction of the spNup132 molecules was recruited  
304 by spNup107. Next, we examined the phenotype of the strain expressing the  
305 spNup96-spNup107-GFP fusion protein. This strain exhibited growth sensitivity to the  
306 microtubule-destabilizing drug thiabendazole (TBZ) (**Figure 7d**), delayed meiotic

307 division (**Figure 7e, f**), and abnormal spore formation (**Figure 7g**) as previously  
308 reported for *nup132Δ* cells (Chen et al., 2004; Asakawa et al., 2014; Yang et al., 2015).  
309 This result suggests that the split structure and the asymmetrical localization in the  
310 Nup107-160 subcomplex are necessary for retaining Nup132 at the nuclear side of the  
311 NPC, which in turn is necessary for normal progression of mitosis and meiosis in *S.*  
312 *pombe*.

313

### 314 **Function of spNup131 at the cytoplasmic side of the NPC**

315 To determine the function of spNup131, we next examined its interacting proteins.  
316 Affinity capture/mass spectrometry identified several proteins other than Nups that  
317 interact with spNup131 (**Supplementary File 1**). Among these proteins, we searched  
318 for those that localize at the nuclear periphery and found spFar8 (also known as spCsc3).  
319 This protein is one of the components of the striatin-interacting phosphatase and kinase  
320 (STRIPAK) complex (Goudreault et al., 2009; Frost et al., 2012) that regulates the  
321 functions of the spindle pole body (SPB; equivalent of MTOC) during mitosis (Singh et  
322 al., 2011). GFP-fused spFar8 (spFar8-GFP) localized at the nuclear periphery during  
323 interphase, as previously reported (Singh et al., 2011) (see “wild type” in **Figure 8a**). To  
324 test whether localization of spFar8 at the nuclear periphery depends on the NPC, we  
325 examined the location of spFar8-GFP in the background of *nup132Δ*. It is known that  
326 NPCs have a clustered distribution on the NE in the background of *nup132Δ* (Baï et al.,  
327 2004; Asakawa et al., 2014). spFar8-GFP exhibited the clustered distribution with NPCs  
328 labeled with spCut11(scNdc1/hsNdc1)-mCherry in *nup132Δ* cells (**Figure 8b**). In  
329 addition, the localization of spFar8 at the nuclear periphery greatly decreased in the  
330 background of *nup131Δ* (see “*nup131Δ*” in **Figure 8a**) despite no marked change in the

331 amount of spFar8 protein (**Figure 8c**). The localization of another STRIPAK complex  
332 protein, spFar11, to the nuclear periphery was also lower in *nup131* $\Delta$  cells (**Figure 8d**).  
333 These results suggest that spNup131 plays a role in retaining the STRIPAK complex at  
334 the NPC in interphase cells.

335

## 336 **Discussion**

337 IEM and yeast two-hybrid analyses of the *S. pombe* Nups suggest that the *S.*  
338 *pombe*-specific Nup107-160 subcomplex structure is uniquely split into two portions  
339 that localize differently to the cytoplasmic and nuclear sides of the NPC while  
340 preserving the conserved modular structures (**Figure 5**). In addition,  
341 affinity-capture/mass spectrometry analysis also partly supports this result (**Figure 3**).  
342 This specificity contrasts with the localization of the Nup107-160 subcomplexes in *H.*  
343 *sapiens*, *S. cerevisiae*, and *Trypanosoma brucei* in which the complex is found on both  
344 the cytoplasmic and nuclear sides of the NPC (Rout et al., 2000; Obado et al., 2016;  
345 D'Angelo et al., 2006). Our results suggest that the *S. pombe* NPC has a novel  
346 organization that has evolved in the *Schizosaccharomyces* genus, which commonly  
347 bears the Nup132 and Nup131 clades (**Figure 1–figure supplement 1**).

348 In *H. sapiens* and *S. cerevisiae*, the Nups in the Nup107-160 subcomplex  
349 assemble to form Y-shaped structures (Lutzmann et al., 2002; Kampmann and Blobel,  
350 2009; Kelley et al., 2015; Stuwe et al., 2015; von Appen et al., 2015). A total of 32  
351 Y-complexes form two concentric reticulated rings at both the nuclear and cytoplasmic  
352 side of the human NPC (Kelley et al., 2015; Stuwe et al., 2015; von Appen et al., 2015).  
353 This organization may be supported by the iso-stoichiometry of each Nup in the  
354 Nup107-160 subcomplex. In fact, the amounts of each Nup in the Nup107-160

355 subcomplex in human cells are nearly equal (Ori et al., 2013). In contrast, in *S. pombe*,  
356 Sec13 and Nup43 are not present in the Nup107-160 subcomplex (Asakawa et al., 2014).  
357 Furthermore, Nups of the Nup107-160 subcomplex are not iso-stoichiometrical, as  
358 revealed in our previous study (Asakawa et al., 2014). The different composition and  
359 stoichiometry of the *S. pombe* Nup107-160 subcomplex components is consistent with  
360 the unique fission-yeast-specific separated structure of the Nup107-160 subcomplex  
361 revealed in this study.

362           The role of the separate locations of the Nup107-160 subcomplex remains  
363 unknown. In mammalian cells undergoing ‘open mitosis,’ the Nup107-160 subcomplex  
364 is required for NPC assembly at an early stage of telophase and is therefore thought to  
365 provide a structural element important for reconstructing the NPC at the end of mitosis  
366 (Walther et al., 2003; Harel et al., 2003; Boehmer et al., 2003). Thus, the Nup107-160  
367 subcomplex has essential scaffold functions. In contrast, Nup133 homologs are  
368 dispensable for vegetative cell growth in fungi undergoing ‘closed mitosis,’ including *S.*  
369 *pombe* and *S. cerevisiae* (Asakawa et al., 2014), suggesting a different role for Nup133  
370 homologs among eukaryotes depending on the type of mitosis. While the role of  
371 Nup133 homologs in vegetative cell growth in fungi is unknown, it is clear that  
372 spNup132 but not spNup131 is required for the progression of meiosis in *S. pombe*,  
373 especially with regard to proper segregation of meiotic chromosomes (Asakawa et al.,  
374 2014; Yang et al., 2015). Such functional differences between spNup131 and spNup132  
375 are reflected by the different locations of these two components within the NPC (**Figure**  
376 **1**). A decrease in spNup132 on the nuclear side and its relocation to the cytoplasmic side  
377 causes defects in meiosis similar to those found in *nup132Δ* cells, further supporting our  
378 conclusion.



379 spNup132 is required for normal kinetochore formation during meiosis in *S.*  
380 *pombe*. Deletion of the *nup132* gene but not the *nup131* gene causes a delay in  
381 kinetochore protein assembly during the first meiotic chromosome segregation (Yang et  
382 al., 2015) and increases the sensitivity to a microtubule destabilizing drug, likely due to  
383 defects in the kinetochore structure (Asakawa et al., 2014). However, the molecular  
384 mechanism of underlying spNup132-mediated regulation of kinetochore proteins  
385 remains unknown. Similarly, in mammalian cells, kinetochore-related functions have  
386 been reported for the Nup107-160 subcomplex. A fraction of the Nup107-160  
387 subcomplex is found at the kinetochores and spindle poles during mitosis (Harel et al.,  
388 2003; Loiodice et al., 2004; Belgareh et al., 2001; Orjalo et al., 2006), and depletion of  
389 the Nup107-160 subcomplex from kinetochores results in altered kinetochore protein  
390 recruitment (Zuccolo et al., 2007; Platani et al., 2009; Mishra et al., 2010). Considering  
391 the similarity in kinetochore-related functions, spNup132 but not spNup131 is likely to  
392 be a functional homolog of mammalian Nup133.

393 IEM analysis in this study revealed that spNup131 is localized only on the  
394 cytoplasmic side of the NPC. What is its function there? Our study revealed an  
395 interaction between spNup131 and spFar8. spFar8 is an *S. pombe* ortholog of the  
396 STRIPAK complex component Striatin (Frost et al., 2012) and is located at the nuclear  
397 periphery in interphase cells (Singh et al., 2011). In *S. pombe*, the STRIPAK complex  
398 regulates the septation initiation network through the conserved protein kinase Mob1  
399 (Moreno et al., 2001; Goudreault et al., 2009) and is required for asymmetric division of  
400 mother and daughter SPBs during mitosis (Singh et al., 2011). The  
401 spNup131-dependent NPC localization of spFar8 revealed by this study implies that the  
402 NPC regulates STRIPAK localization in interphase cells. Human STRIPAK complexes

403 have been proposed to play roles at the interface between the Golgi and the outer  
404 nuclear envelope (Frost et al., 2012). Considering the localization of spNup131,  
405 STRIPAK is likely to interact with the NPC on the cytoplasmic side of the NE.  
406 Although the role of the STRIPAK complex in interphase cells in *S. pombe* is not fully  
407 understood, the interaction between spNup131 and spFar8 may provide an important  
408 example linking the NPC to cytoplasmic structures.

409         This study suggests that the *S. pombe* NPC maintains conserved modular  
410 structures while exhibiting some structural differences. In particular, the Nup107-160  
411 subcomplex appears to have a novel separated structure and exhibits a localization  
412 pattern not reported in other organisms. Recent studies suggest that NPC structures are  
413 not necessarily the same among eukaryotes. For example, the binucleated ciliate  
414 *Tetrahymena thermophila* has two functionally distinct nuclei called the macronucleus  
415 (MAC) and micronucleus (MIC), which differ in size, transcriptional activity, and  
416 nucleocytoplasmic transport specificity (Karrer, 2012). Interestingly, in *T. thermophila*,  
417 the NPCs in the MAC and the MIC differ in the amount of Nup107-160 subcomplex  
418 present (Iwamoto et al., 2017). The amount of the subcomplex in the MIC is about three  
419 times more than that in the MAC, suggesting that the Nup107-160 subcomplex form  
420 different structures in the MAC and MIC. In addition, in some multicellular organisms,  
421 the expression level of Nups varies between cell types and during development (Ori et  
422 al., 2013; Cho et al., 2009; Olsson et al., 2004; D'Angelo et al., 2009; D'Angelo et al.,  
423 2012). It is also known that some mutations in Nups result in developmental defects in  
424 metazoans (Raices and D'Angelo, 2012). These findings suggest that the NPC  
425 composition in cell types and during development is biologically significant. An altered  
426 composition might alter the NPC structure, at least in part; thus, unidentified NPC

427 subcomplex structures may play roles in biological events. Thus, novel NPC structures  
428 may be found in organisms or cell types with different compositions of Nups as we  
429 found in *S. pombe*.  
430

431 **Materials and Methods**

432 ***S. pombe* strains and cultivation**

433 The *S. pombe* strains used in this study are listed in supplementary Table 2. Fusion  
434 genes were constructed using a two-step PCR method and introduced into cells. YES or  
435 EMM2 culture medium was used for routine cultures (Moreno et al., 1991). ME  
436 medium was used to induce meiosis and spore formation. When necessary, TBZ was  
437 added to the YES medium to a final concentration of 10 µg/mL.

438

439 ***Immunoelectron microscopy***

440 For immunoelectron microscopy,  $1.5 \times 10^8$  cells were fixed in 1 mL of a mixture of 4%  
441 formaldehyde and 0.01% glutaraldehyde dissolved in 0.1 M phosphate buffer (PB)  
442 (pH7.4) for 20 min at room temperature, treated with 0.5 mg/mL Zymolyase 100T  
443 (Nacalai Tesque, Inc., Kyoto, Japan) in PB for 20-30 min at 30°C, and then  
444 permeabilized with 0.2% saponin (Nacalai Tesque, Inc.) and 1% bovine serum albumin  
445 (BSA) in PB for 15 min. The GFP epitope tag was labeled with a primary antibody  
446 (rabbit polyclonal anti-GFP antibody, Rockland Immunochemicals, Limerick, PA,  
447 USA) diluted at 1:400 in PB containing 1% BSA and 0.01% saponin, and a secondary  
448 antibody (goat anti-rabbit Alexa 594 FluoroNanogold Fab' fragment; Nanoprobes Inc.,  
449 Yaphank, NY, USA) diluted 1:400. For analysis of the spNup98 N-terminal region, we  
450 used a mouse monoclonal anti-Nup98 antibody (13C2) (Iwamoto et al., 2013; Asakawa  
451 et al., 2015) diluted 1:100 and anti-mouse Alexa594 FluoroNanogold Fab' fragment  
452 (Nanoprobes) diluted 1:400. Cells then were fixed again with 1% glutaraldehyde in PB  
453 for 1 h at room temperature and treated with 100 mM lysine HCl in PB twice for 10 min  
454 each. The cells were stored at 4°C until use. Before use, the cells were incubated with

455 50 mM HEPES (pH 5.8) three times for 3 min each and with distilled water (DW) once,  
456 incubated with the Silver enhancement reagent (a mixture of equal volumes of the  
457 following A, B, and C solutions: A, 0.2% silver acetate solution; B, 2.8% trisodium  
458 citrate-2H<sub>2</sub>O, 3% citric acid-H<sub>2</sub>O, and 0.5% hydroquinone; C, 300 mM HEPES, pH 8.2)  
459 at 25°C for 3 min. Cells were embedded in 2% low melting agarose dissolved in DW.  
460 Cells were post-fixed with 2% OsO<sub>4</sub> in DW for 15 min and stained with 1% uranyl  
461 acetate in DW at room temperature. Cells were dehydrated using stepwise incubations  
462 in ethanol and acetone and finally embedded in epoxy resin Epon812. Solidified blocks  
463 containing cells were sectioned, and the ultra-thin sections were stained with uranyl  
464 acetate and lead citrate, the usual pretreatment for EM observations. Images were  
465 obtained using a JEM1400 transmission electron microscope (JEOL, Tokyo, Japan) at  
466 120kV.

467 Nuclear pores containing more than two immunogold particles were chosen for  
468 localization analysis as described previously (Rout et al., 2000). To confirm the  
469 accessibility of the nucleus to immunogold particles, the nuclear centromere protein  
470 spMis6-GFP was co-expressed with GFP-fused Nups in cells and stained with anti-GFP  
471 antibody for IEM. For quantification of the Nup signals, we chose only cell specimens  
472 with a positive spMis6-GFP signal. For quantitative representations, montage pictures  
473 were produced by stacking 20 NPC images with 5% opacity on Adobe Photoshop CS  
474 software.

475

#### 476 ***cDNA clones***

477 *nup107<sup>+</sup>* and *nup37<sup>+</sup>* cDNAs were provided by National BioResource Project Japan  
478 (<http://yeast.lab.nig.ac.jp/yeast/top.xhtml>). cDNA fragments of other Nups were

479 amplified from a cDNA library pTN-RC5 or pTN-FC9 (National BioResource Project  
480 Japan) using PCR.

481

#### 482 ***Strain construction***

483 To visualize nuclear pore localization of the different domains of Nup131 and Nup132,  
484 *lys1<sup>+</sup>*-integrating plasmids carrying GFPs65t-fused with respective Nup domains were  
485 introduced into cells with a *nup131Δnup132Δ* double-mutant background. To construct  
486 the spNup96-spNup107 fusion Nup, a cDNA fragment encoding spNup107 or  
487 spNup107-GFP followed by a drug resistance marker gene was integrated after the  
488 chromosomal spNup96 coding region. After a diploid strain was obtained by crossing  
489 the yielded and wild type strains, the *nup107<sup>+</sup>* gene on the original chromosomal locus  
490 was deleted. To introduce the chromosomal fluorescent tag and gene disruption, a  
491 two-step PCR method was applied (Bähler et al, 1998). Nup-GFP fusion constructs  
492 were described previously (Asakawa et al., 2014). The spMis6-GFP fusion was  
493 constructed as described previously (Chikashige et al., 2004) or using the two-step PCR  
494 method. mCherry-spAtb2 was visualized as described previously (Yang et al., 2015).

495

#### 496 ***Plasmid construction***

497 To express the full-length or domains of the spNup131 and spNup132 proteins, cDNA  
498 fragments were amplified by PCR. The PCR products were sub-cloned into the *Bg/III*  
499 site of the plasmid of pY53 that carries the *nup132* promoter (-1000bp)-driven GFPs65t  
500 using the In-Fusion PCR cloning kit (Clontech Laboratories, Mountain View, CA,  
501 USA).

502

503 ***Preparation of whole cell extracts***

504 Growing cells (about  $5 \times 10^9$ ) were collected and washed with 10 mM HEPES buffer  
505 (pH 7.5) containing 1 mM PMSF. The washed cell pellet was suspended in 10 mM  
506 HEPES buffer (pH 7.5) containing 1 mM PMSF, divided into aliquots of  $3 \times 10^8$  cells,  
507 and kept frozen by liquid nitrogen until use. To make a cell extract, the cell pellet was  
508 thawed and suspended in 100  $\mu$ L of lysis buffer (50 mM HEPES (pH 7.5), 150 mM  
509 NaCl, 1% Triton X-100, 1 mM EDTA, 2 mM PMSF) with a protease inhibitor cocktail  
510 (167-26081, Wako, Tokyo, Japan) and mashed by glass beads using Multi-beads  
511 shocker (Yasui Kikai Corporation, Osaka, Japan). To prepare a whole cell extract from  
512 spNup98-GFP expressing cells, the other lysis buffer (50mM HEPES pH7.5, 150mM  
513 NaCl, 1mM EDTA, 2mM PMSF, 1% Triton, 0.1% SDS, 0.5% sodium deoxycholate)  
514 with a protease inhibitor cocktail was used. After the further addition of 400  $\mu$ L of lysis  
515 buffer, the mashed cell pellet was transferred to new microtubes. The supernatant was  
516 collected after centrifugation at 15 000 rpm for 15 min at 4°C and used as the  
517 whole-cell extract.

518

519 ***Affinity-capture and LC/MS/MS analysis***

520 The whole-cell extract was incubated with a rabbit anti-GFP antibody (Rockland).  
521 Antibody-conjugated proteins were collected by incubating with Protein A Sepharose  
522 beads (17528001, GE Healthcare). Beads were then washed 4-5 times with the lysis  
523 buffer described above. After elution in SDS-PAGE sample buffer, protein samples were  
524 loaded onto a 12% SDS-PAGE gel for liquid chromatography coupled to tandem MS  
525 (LC/MS/MS). Data analysis for LC/MS/MS was performed as described previously  
526 (Nozawa et al., 2013) using the Pombase protein dataset released on November 12,

527 2015. The number of unique spectra and emPAI values (Ishihama et al., 2005) were  
528 computed from one measurement of all pieces of the gel. For spNup131 and spNup132,  
529 protein samples were prepared from two independent experiments and each preparation  
530 was analyzed by LC/MS/MS, and unique spectra detected for at least one of the samples  
531 were identified as interacting proteins with spNup131 and spNup132. For each of other  
532 Nups, protein samples from a single preparation were analyzed by LC/MS/MS.

533

#### 534 *Fluorescence microscopy*

535 Images were obtained using a DeltaVision microscope system (GE Healthcare, Tokyo,  
536 Japan) equipped with a CoolSNAP HQ<sup>2</sup> CCD camera (Photometrics, Tucson, AZ, USA)  
537 through an oil-immersion objective lens (PlanApoN60×OSC; NA, 1.4) (Olympus,  
538 Tokyo, Japan) as described previously (Asakawa et al., 2014). Z-stack images were  
539 obtained and subjected to deconvolution that remove out-of-focus images to improve  
540 images as described previously. For time lapse microscopy, cells were observed every 5  
541 minutes as described previously (Yang et al., 2015). The projection images of z-stacks  
542 were made by softWoRx software equipped in the microscope system.

543

#### 544 *Yeast two-hybrid assay*

545 The yeast two-hybrid assay was performed according to the manufacturer's protocol  
546 (Clontech Laboratories). *S. pombe* Nup cDNAs were cloned into the pGAD424, pGBT9,  
547 and pBridge vectors. AH109 was used as the host strain. Spot assay was performed  
548 twice or three times for each test, and representative results were shown in Figure 4.

549

#### 550 **Acknowledgements**



551 We thank the National BioResource Project Japan for the Nup cDNA clones. We also  
552 thank Drs. Thomas U. Schwartz and Valérie Doye for critical reading of this paper. This  
553 work was supported by the Uehara Memorial Foundation to TH and by the following  
554 JSPS KAKENHI grants: JP26440098 to HA; JP15K07066 to MI; JP15K06942 and  
555 JP15H01462 to KN; JP16H04739 and JP 25116004 to COB; JP26251037 and  
556 JP16H01309 to YH; JP25116006, JP26291007, and JP17K19505 to TH.

557

#### 558 **Competing financial interests**

559 The authors declare no competing financial interests.

560

#### 561 **References**

562 Alber F, Dokudovskaya S, Veenhoff LM, Zhang W, Kipper J, Devos D, Suprpto A,  
563 Schmidt OK, Williams R, Chait BT, Sali A. Rout MP. 2007. The molecular  
564 architecture of the nuclear pore complex. *Nature* 450: 695-701.

565 doi:10.1038/nature06405

566 Amlacher S, Sarges P, Flemming D, van Noort V, Kunze R, Devos DP, Arumugam M,  
567 Bork P, Hurt E. 2011. Insight into structure and assembly of the nuclear pore  
568 complex by utilizing the genome of a eukaryotic thermophile. *Cell* 146: 277-286.

569 doi:10.1016/j.cell.2011.06.039.

570 Asakawa H, Yang HJ, Yamamoto TG, Ohtsuki C, Chikashige Y, Sakata-Sogawa K,

571 Tokunaga M, Iwamoto M, Hiraoka Y, Haraguchi T. 2014.Characterization of  
572 nuclear pore complex components in fission yeast *Schizosaccharomyces pombe*.

573 *Nucleus*. 5: 149-162. doi:10.4161/nucl.28487

574 Asakawa H, Mori C, Ohtsuki C, Iwamoto M, Hiraoka Y, Haraguchi T. 2015.

- 575 Uncleavable Nup98-Nup96 is functional in the fission yeast *Schizosaccharomyces*  
576 *pombe*. FEBS Open Bio. 5: 508-514. doi:10.1016/j.fob.2015.06.004.
- 577 Bähler J, Wu JQ, Longtine MS, Shah NG, McKenzie A 3rd, Steever AB, Wach A,  
578 Philippsen P, Pringle JR. 1998. Heterologous modules for efficient and versatile  
579 PCR-based gene targeting in *Schizosaccharomyces pombe*. Yeast. 14: 943-951.  
580 doi:10.1002/(SICI)1097-0061(199807)14:10<943::AID-YEA292>3.0.CO;2-Y
- 581 Bai SW, Rouquette J, Umeda M, Faigle W, Loew D, Sazer S, Doye V. 2004. The fission  
582 yeast Nup107-120 complex functionally interacts with the small GTPase Ran/Spi1  
583 and is required for mRNA export, nuclear pore distribution, and proper cell division.  
584 Mol Cell Biol. 24: 6379-6392. doi:10.1128/MCB.24.14.6379-6392.2004
- 585 Belgareh N, Rabut G, Bai SW, van Overbeek M, Beaudouin J, Daigle N, Zatssepina OV,  
586 Pasteau F, Labas V, Fromont-Racine M, Ellenberg J, Doye V. 2001. An  
587 evolutionarily conserved NPC subcomplex, which redistributes in part to  
588 kinetochores in mammalian cells. J Cell Biol. 154: 1147-1160.  
589 doi:10.1083/jcb.200101081
- 590 Bilokapic S, Schwartz TU. 2012. Molecular basis for Nup37 and ELY5/ELYS  
591 recruitment to the nuclear pore complex. Proc Natl Acad Sci U S A. 109:  
592 15241-15246. doi:10.1073/pnas.1205151109
- 593 Boehmer T, Enninga J, Dales S, Blobel G, Zhong H. 2003. Depletion of a single  
594 nucleoporin, Nup107, prevents the assembly of a subset of nucleoporins into the  
595 nuclear pore complex. Proc Natl Acad Sci U S A. 100: 981-985.  
596 doi:10.1073/pnas.252749899
- 597 Bui KH, von Appen A, DiGuilio AL, Ori A, Sparks L, Mackmull MT, Bock T, Hagen W,  
598 Andrés-Pons A, Glavy JS, Beck M. 2013. Integrated structural analysis of the

- 599 human nuclear pore complex scaffold. *Cell*. 155: 1233-1243.  
600 doi:10.1016/j.cell.2013.10.055
- 601 Chen XQ, Du X, Liu J, Balasubramanian MK, Balasundaram D. 2004. Identification of  
602 genes encoding putative nucleoporins and transport factors in the fission yeast  
603 *Schizosaccharomyces pombe*: a deletion analysis. *Yeast*. 21: 495-509.  
604 doi:10.1002/yea.1115
- 605 Chikashige Y, Kurokawa R, Haraguchi T, Hiraoka Y. 2004. Meiosis induced by  
606 inactivation of Pat1 kinase proceeds with aberrant nuclear positioning of  
607 centromeres in the fission yeast *Schizosaccharomyces pombe*. *Genes Cells*. 9:  
608 671-684. doi:10.1111/j.1356-9597.2004.00760.x
- 609 Cho AR, Yang KJ, Bae Y, Bahk YY, Kim E, Lee H, Kim JK, Park W, Rhim H, Choi SY,  
610 Imanaka T, Moon S, Yoon J, Yoon SK. 2009. Tissue-specific expression and  
611 subcellular localization of ALADIN, the absence of which causes human triple A  
612 syndrome. *Exp. Mol. Med*. 41: 381–386. doi:10.3858/emm.2009.41.6.043
- 613 Cronshaw JM, Krutchinsky AN, Zhang W, Chait BT, Matunis MJ. 2002. Proteomic  
614 analysis of the mammalian nuclear pore complex. *J Cell Biol*. 158: 915-927.  
615 doi:10.1083/jcb.200206106
- 616 D'Angelo MA, Anderson DJ, Richard E, Hetzer MW. 2006. Nuclear pores form de novo  
617 from both sides of the nuclear envelope. *Science*. 312: 440-443.  
618 doi:10.1126/science.1124196
- 619 D'Angelo MA, Raices M, Panowski SH, Hetzer MW. 2009. Age-dependent  
620 deterioration of nuclear pore complexes causes a loss of nuclear integrity in  
621 postmitotic cells. *Cell* 136: 284-295. doi:10.1016/j.cell.2008.11.037
- 622 D'Angelo MA, Gomez-Cavazos JS, Mei A, Lackner DH, Hetzer MW. 2012. A change in

623 nuclear pore complex composition regulates cell differentiation. *Dev Cell*. 22:  
624 446-458. doi: 10.1016/j.devcel.2011.11.021

625 DeGrasse JA, DuBois KN, Devos D, Siegel TN, Sali A, Field MC, Rout MP, Chait BT.  
626 2009. Evidence for a shared nuclear pore complex architecture that is conserved  
627 from the last common eukaryotic ancestor. *Mol Cell Proteomics*. 8: 2119-2130.  
628 doi:10.1074/mcp.M900038-MCP200

629 Fernandez-Martinez J, Phillips J, Sekedat MD, Diaz-Avalos R, Velazquez-Muriel J,  
630 Franke JD, Williams R, Stokes DL, Chait BT, Sali A, Rout MP. 2012.  
631 Structure-function mapping of a heptameric module in the nuclear pore complex. *J.*  
632 *Cell Biol*. 196: 419-434. doi:10.1083/jcb.201109008

633 Fischer J, Teimer R, Amlacher S, Kunze R, Hurt E. 2015. Linker Nups connect the  
634 nuclear pore complex inner ring with the outer ring and transport channel. *Nat*  
635 *Struct Mol Biol*. 22: 774-781. doi:10.1038/nsmb.3084

636 Flemming D, Thierbach K, Stelter P, Böttcher B, Hurt E. 2010. Precise mapping of  
637 subunits in multiprotein complexes by a versatile electron microscopy label. *Nat*  
638 *Struct Mol Biol*. 17: 775-778. doi:10.1038/nsmb.1811

639 Frost A, Elgort MG, Brandman O, Ives C, Collins SR, Miller-Vedam L, Weibezahn J,  
640 Hein MY, Poser I, Mann M, Hyman AA, Weissman JS. 2012. Functional  
641 repurposing revealed by comparing *S. pombe* and *S. cerevisiae* genetic interactions.  
642 *Cell*. 149: 1339-1352. doi:10.1016/j.cell.2012.04.028

643 Goudreault M, D'Ambrosio LM, Kean MJ, Mullin MJ, Larsen BG, Sanchez A,  
644 Chaudhry S, Chen GI, Sicheri F, Nesvizhskii AI, Aebersold R, Raught B, Gingras  
645 AC. 2009. A PP2A phosphatase high density interaction network identifies a novel  
646 striatin-interacting phosphatase and kinase complex linked to the cerebral

- 647 cavernous malformation 3 (CCM3) protein. *Molecular & Cellular Proteomics*.  
648 8:157-171. doi:10.1074/mcp.M800266-MCP200
- 649 Griffis ER, Xu S, Powers MA. 2003. Nup98 localizes to both nuclear and cytoplasmic  
650 sides of the nuclear pore and binds to two distinct nucleoporin subcomplexes. *Mol*  
651 *Biol Cell*. 14: 600-610. doi:10.1091/mbc.E02-09-0582
- 652 Guindon, S., Dufayard, J.F., Lefort, V., Anisimova, M., Hordijk, W. & Gascuel, O. New  
653 algorithms and methods to estimate maximum-likelihood phylogenies: assessing  
654 the performance of PhyML 3.0. *Syst Biol*. 59, 307-321 (2010). doi:  
655 10.1093/sysbio/syq010
- 656 Harel A, Orjalo AV, Vincent T, Lachish-Zalait A, Vasu S, Shah S, Zimmerman E,  
657 Elbaum M, Forbes DJ. 2003. Removal of a single pore subcomplex results in  
658 vertebrate nuclei devoid of nuclear pores. *Mol Cell*. 11: 853-864.  
659 doi:10.1016/S1097-2765(03)00116-3
- 660 Hodel AE, Hodel MR, Griffis ER, Hennig KA, Ratner GA, Xu S, Powers MA. 2002.  
661 The three-dimensional structure of the autoproteolytic, nuclear pore-targeting  
662 domain of the human nucleoporin Nup98. *Mol Cell*. 10: 347-358.  
663 doi:10.1016/S1097-2765(02)00589-0
- 664 Huerta-Cepas, J., Serra, F. & Bork, P. ETE 3: Reconstruction, Analysis, and  
665 Visualization of Phylogenomic Data. *Mol Biol Evol*. 33, 1635-1638 (2016).  
666 doi:10.1093/molbev/msw046
- 667 Ishihama Y, Oda Y, Tabata T, Sato T, Nagasu T, Rappsilber J, Mann M. 2005.  
668 Exponentially modified protein abundance index (emPAI) for estimation of  
669 absolute protein amount in proteomics by the number of sequenced peptides per  
670 protein. *Mol Cell Proteomics*. 4: 1265-1272. doi:10.1074/mcp.M500061-MCP200

- 671 Iwamoto M, Asakawa H, Ohtsuki C, Osakada H, Koujin T, Hiraoka Y, Haraguchi T.  
672 2013. Monoclonal antibodies recognize Gly-Leu-Phe-Gly repeat of nucleoporin  
673 Nup98 of *Tetrahymena*, yeasts, and humans. *Monoclon Antib Immunodiagn*  
674 *Immunother.* 32: 81-90. doi: 10.1089/mab.2012.0118
- 675 Iwamoto M, Osakada H, Mori C, Fukuda Y, Nagao K, Obuse C, Hiraoka Y, Haraguchi T.  
676 2017. Compositionally distinct nuclear pore complexes of functionally distinct  
677 dimorphic nuclei in the ciliate *Tetrahymena*. *J Cell Sci.* 130: 1822-1834.  
678 doi:10.1242/jcs.199398
- 679 Kampmann M, Blobel G. 2009. Three-dimensional structure and flexibility of a  
680 membrane-coating module of the nuclear pore complex. *Nat Struct Mol Biol.* 16:  
681 782-788. doi:10.1038/nsmb.1618
- 682 Karrer KM. 2012. Nuclear dualism. *Methods Cell Biol.* 109: 29-52.  
683 doi:10.1016/B978-0-12-385967-9.00003-7
- 684 Kelley K, Knockenhauer KE, Kabachinski G, Schwartz TU. 2015. Atomic structure of  
685 the Y complex of the nuclear pore. *Nat Struct Mol Biol.* 22: 425-431.  
686 doi:10.1038/nsmb.2998
- 687 Knockenhauer KE, Schwartz TU. 2016. The nuclear pore complex as a flexible and  
688 dynamic gate. *Cell.* 164: 1162-1171. doi:10.1016/j.cell.2016.01.034
- 689 Kosinski J, Mosalaganti S, von Appen A, Teimer R, DiGuilio AL, Wan W, Bui KH,  
690 Hagen WJ, Briggs JA, Glavy JS, Hurt E, Beck M. 2016. Molecular architecture of  
691 the inner ring scaffold of the human nuclear pore complex. *Science.* 352: 363-365.  
692 doi: 10.1126/science.aaf0643
- 693 Lin DH, Stuwe T, Schilbach S, Rundlet EJ, Perriches T, Mobbs G, Fan Y, Thierbach K,  
694 Huber FM, Collins LN, Davenport AM, Jeon YE, Hoelz A. 2016. Architecture of

- 695 the symmetric core of the nuclear pore. *Science*. 352, aaf1015.  
696 doi:10.1126/science.aaf1015
- 697 Liu HL, De Souza CP, Osmani AH, Osmani SA. 2009. The three fungal transmembrane  
698 nuclear pore complex proteins of *Aspergillus nidulans* are dispensable in the  
699 presence of an intact An-Nup84-120 complex. *Mol. Biol. Cell*. 20: 616-630.  
700 doi:10.1091/mbc.E08-06-0628.
- 701 Liu NN, Han TX, Du LL, Zhou JQ. 2010. A genome-wide screen for  
702 *Schizosaccharomyces pombe* deletion mutants that affect telomere length. *Cell Res*.  
703 20: 963-965. doi:10.1038/cr.2010.107
- 704 Loïdodice I, Alves A, Rabut G, Van Overbeek M, Ellenberg J, Sibarita JB, Doye V. 2004.  
705 The entire Nup107-160 complex, including three new members, is targeted as one  
706 entity to kinetochores in mitosis. *Mol Biol Cell*. 15: 3333-3344.  
707 doi:10.1091/mbc.E03-12-0878
- 708 Lutzmann M, Kunze R, Buerer A, Aebi U, Hurt E. 2002. Modular self-assembly of a  
709 Y-shaped multiprotein complex from seven nucleoporins. *EMBO J*. 21: 387-397.  
710 doi:10.1093/emboj/21.3.387
- 711 Mishra RK, Chakraborty P, Arnaoutov A, Fontoura BM, Dasso M. 2010. The  
712 Nup107-160 complex and gamma-TuRC regulate microtubule polymerization at  
713 kinetochores. *Nat Cell Biol*. 12: 164-169. doi:10.1038/ncb2016
- 714 Moreno CS, Lane WS, Pallas DC. 2001. A mammalian homolog of yeast MOB1 is both  
715 a member and a putative substrate of striatin family-protein phosphatase 2A  
716 complexes. *J. Biol. Chem*. 276: 24253–24260. doi:10.1074/jbc.M102398200
- 717 Moreno S, Klar A, Nurse P. 1991. Molecular genetic analysis of fission yeast  
718 *Schizosaccharomyces pombe*. *Methods Enzymol*. 194: 795-823.

- 719        doi:10.1016/0076-6879(91)94059-L
- 720    Nozawa RS, Nagao K, Igami KT, Shibata S, Shirai N, Nozaki N, Sado T, Kimura H,  
721        Obuse C. 2013. Human inactive X chromosome is compacted through a  
722        polycomb-independent SMCHD1-HBiX1 pathway. *Nature Structure & Molecular*  
723        *Biology* 20: 566–573. doi:10.1038/nsmb.2532
- 724    Nie M, Boddy MN. 2015. Pli1(PIAS1) SUMO ligase protected by the nuclear  
725        pore-associated SUMO protease Ulp1/SEN1/2. *J Biol Chem.* 290: 22678-22685.  
726        doi:10.1074/jbc.M115.673038
- 727    Obado SO, Brillantes M, Uryu K, Zhang W, Ketaren NE, Chait BT, Field MC, Rout MP.  
728        2016. Interactome mapping reveals the evolutionary history of the nuclear pore  
729        complex. *PLoS Biol.* 14: e1002365. doi:10.1371/journal.pbio.1002365
- 730    Olsson M, Schéele S, Ekblom P. 2004. Limited expression of nuclear pore membrane  
731        glycoprotein 210 in cell lines and tissues suggests cell-type specific nuclear pores in  
732        metazoans. *Exp Cell Res.* 292, 359-370. doi:10.1016/j.yexcr.2003.09.014
- 733    Ori A, Banterle N, Iskar M, Andrés-Pons A, Escher C, Bui KH, Sparks L,  
734        Solis-Mezarino V, Rinner O, Bork P, Lemke EA, Beck M. 2013. Cell type-specific  
735        nuclear pores: a case in point for context-dependent stoichiometry of molecular  
736        machines. *Mol Syst Biol.* 9: 648. doi:10.1038/msb.2013.4.
- 737    Orjalo AV, Arnaoutov A, Shen Z, Boyarchuk Y, Zeitlin SG, Fontoura B, Briggs S, Dasso  
738        M, Forbes DJ. 2006. The Nup107-160 nucleoporin complex is required for correct  
739        bipolar spindle assembly. *Mol Biol Cell.* 17: 3806-3818.  
740        doi:10.1091/mbc.E05-11-1061
- 741    Platani M, Santarella-Mellwig R, Posch M, Walczak R, Swedlow JR, Mattaj IW. 2009.  
742        The Nup107-160 nucleoporin complex promotes mitotic events via control of the



- 743 localization state of the chromosome passenger complex. *Mol Biol Cell*. 20:  
744 5260-5275. doi:10.1091/mbc.E09-05-0377
- 745 Rasala BA, Orjalo AV, Shen Z, Briggs S, Forbes DJ. 2006. ELYS is a dual  
746 nucleoporin/kinetochore protein required for nuclear pore assembly and proper cell  
747 division. *Proc Natl Acad Sci U S A*. 103: 17801-17806.  
748 doi:10.1073/pnas.0608484103
- 749 Raices M, D'Angelo MA. 2012. Nuclear pore complex composition: a new regulator of  
750 tissue-specific and developmental functions. *Nat Rev Mol Cell Biol*. 13: 687-699.  
751 doi:10.1038/nrm3461
- 752 Ratner GA, Hodel AE, Powers MA. 2007. Molecular determinants of binding between  
753 Gly-Leu-Phe-Gly nucleoporins and the nuclear pore complex. *J Biol Chem*. 282:  
754 33968-33976. doi:10.1074/jbc.M707911200
- 755 Rout MP, Aitchison JD, Suprpto A, Hjertaas K, Zhao Y, Chait BT. 2000. The yeast  
756 nuclear pore complex: composition, architecture, and transport mechanism. *J Cell*  
757 *Biol*. 148: 635-651. doi:10.1083/jcb.148.4.635
- 758 Saitoh S, Takahashi K, Yanagida M. 1997. Mis6, a fission yeast inner centromere  
759 protein, acts during G1/S and forms specialized chromatin required for equal  
760 segregation. *Cell*. 90: 131-143. doi:10.1016/S0092-8674(00)80320-7
- 761 Sievers, F. & Higgins, D.G. Clustal Omega, accurate alignment of very large numbers  
762 of sequences. *Methods Mol Biol*. 1079, 105-116 (2014). doi:  
763 10.1007/978-1-62703-646-7\_6
- 764 Singh NS, Shao N, McLean JR, Sevugan M, Ren L, Chew TG, Bimbo A, Sharma R,  
765 Tang X, Gould KL, Balasubramanian MK. 2011. SIN-inhibitory phosphatase  
766 complex promotes Cdc11p dephosphorylation and propagates SIN asymmetry in

- 767 fission yeast. *Curr Biol.* 21: 1968-1978. doi:10.1016/j.cub.2011.10.051
- 768 Stuwe T, von Borzyskowski LS, Davenport AM, Hoelz A. 2012. Molecular basis for the  
769 anchoring of proto-oncoprotein Nup98 to the cytoplasmic face of the nuclear pore  
770 complex. *J Mol Biol.* 419: 330-346. doi:10.1016/j.jmb.2012.03.024
- 771 Stuwe T, Correia AR, Lin DH, Paduch M, Lu VT, Kossiakoff AA, Hoelz A. 2015.  
772 Nuclear pores. Architecture of the nuclear pore complex coat. *Science.* 347:  
773 1148-1152. doi:10.1126/science.aaa4136
- 774 Stuwe T, Bley CJ, Thierbach K, Petrovic S, Schilbach S, Mayo DJ, Perriches T, Rundlet  
775 EJ, Jeon YE, Collins LN, Huber FM, Lin DH, Paduch M, Koide A, Lu V, Fischer J,  
776 Hurt E, Koide S, Kossiakoff AA, Hoelz A. 2015. Architecture of the fungal nuclear  
777 pore inner ring complex. *Science.* 350: 56-64. doi:10.1126/science.aac9176
- 778 Tamura K, Fukao Y, Iwamoto M, Haraguchi T, Hara-Nishimura I. 2010. Identification  
779 and characterization of nuclear pore complex components in *Arabidopsis thaliana*.  
780 *Plant Cell.* 22: 4084-4097. doi:10.1105/tpc.110.079947
- 781 Thierbach K, von Appen A, Thoms M, Beck M, Flemming D, Hurt E. 2013. Protein  
782 interfaces of the conserved Nup84 complex from *Chaetomium thermophilum*  
783 shown by crosslinking mass spectrometry and electron microscopy. *Structure.* 21:  
784 1672-1682. doi:10.1016/j.str.2013.07.004
- 785 von Appen A, Kosinski J, Sparks L, Ori A, DiGuilio AL, Vollmer B, Mackmull MT,  
786 Banterle N, Parca L, Kastritis P, Buczak K, Mosalaganti S, Hagen W, Andres-Pons  
787 A, Lemke EA, Bork P, Antonin W, Glavy JS, Bui KH, Beck M. 2015. *In situ*  
788 structural analysis of the human nuclear pore complex. *Nature.* 526: 140-143.  
789 doi:10.1038/nature15381
- 790 Walther TC, Alves A, Pickersgill H, Loiodice I, Hetzer M, Galy V, Hülsmann BB,

- 791 Köcher T, Wilm M, Allen T, Mattaj IW, Doye V. 2003. The conserved Nup107-160  
792 complex is critical for nuclear pore complex assembly. *Cell*. 113: 195-206.  
793 doi:10.1016/S0092-8674(03)00235-6
- 794 Whittle JR, Schwartz TU. 2009. Architectural nucleoporins Nup157/170 and Nup133  
795 are structurally related and descend from a second ancestral element. *J Biol Chem*.  
796 284: 28442-28452. doi:10.1074/jbc.M109.023580
- 797 Yang HJ, Asakawa H, Haraguchi T, Hiraoka Y. 2015. Nup132 modulates meiotic  
798 spindle attachment in fission yeast by regulating kinetochore assembly. *J Cell Biol*.  
799 211: 295-308. doi:10.1083/jcb.201501035
- 800 Zuccolo M, Alves A, Galy V, Bolhy S, Formstecher E, Racine V, Sibarita JB, Fukagawa  
801 T, Shiekhattar R, Yen T, Doye V. 2007. The human Nup107-160 nuclear pore  
802 subcomplex contributes to proper kinetochore functions. *EMBO J*. 26: 1853-1864.  
803 doi:10.1038/sj.emboj.7601642
- 804

805 **Figure legends**

806 **Figure 1.** Localization of spNup131 and spNup132 at NPCs. **(a)** Distribution of  
807 secondary structure elements on spNup131 and spNup132. Both spNup131 and  
808 spNup132 have structural features in common with Nup133 found in many organisms,  
809 such as the N-terminal  $\beta$ -propeller rich region assigned as the Nup133 N-terminal like  
810 domain (Pfam PF08801; amino acid residues 44–454 in spNup131 and 50–440 in  
811 spNup132) and the C-terminal  $\alpha$ -helical stack region assigned as the  
812 Non-repetitive/WGA-negative nucleoporin C-terminal domain (Pfam PF03177; a.a.  
813 residues 581–1049 in spNup131 and 515–1084 in spNup132). **(b)** IEM of  
814 GFP-spNup131 and GFP-spNup132. Arrows indicate the nuclear pores. Scale bar, 100  
815 nm. **(c)** Quantitative representation of IEM for N-terminally tagged spNup131 and  
816 spNup132. (left) A montage image of 20 immunoelectron micrographs. The diameter of  
817 the circle is 200 nm. (right) A schematic drawing illustrating the distribution of  
818 immunogold particles shown in the montage image. Red dots represent the pore centers.  
819 **(d)** Quantitative representation of IEM for C-terminally tagged spNup131 and  
820 spNup132. Montage pictures and distributions of immunogold particles are shown as  
821 described in **(c)**.

822

823 **Figure 1–figure supplement 1. Phylogenetic tree of Nup133-like proteins.**

824 Species names and Genbank accession numbers are shown. spNup131- and  
825 spNup132-like proteins found in fission yeasts are colored. Alignment and phylogenetic  
826 reconstructions were performed using the “build” function of ETE3 v3.0.0b32  
827 (Huerta-Cepas et al., 2016) implemented on GenomeNet  
828 (<http://www.genome.jp/tools/ete/>). Alignment was performed using Clustal Omega

829 v1.2.1 with default options (Sievers and Higgins, 2014). The ML tree was inferred using  
830 PhyML v20160115 run with model JTT (Guindon et al., 2010). Branch supports are the  
831 Chi<sup>2</sup>-based parametric values determined using the approximate likelihood ratio test.

832

833 **Figure 1–figure supplement 2. IEM of spMis6, spNup131 and spNup132.**

834 **(a)** IEM of spMis6-GFP. An original electron micrograph (left) and its duplicated image  
835 (right) indicating subcellular structures are shown. SPB, spindle pole body; NE, nuclear  
836 envelope. **(b)** IEM of coexpressed GFP-spNup131 and spMis6-GFP. A representative  
837 image is shown. Arrows indicate immunogold at the nuclear pores. The yellow-lined  
838 regions indicate immunogold near the SPB, corresponding to the signals from  
839 spMis6-GFP. **(c, d)** Immunoelectron micrographs of 20 nuclear pores used to generate  
840 the montage picture and distribution analysis in **Fig. 1(c)**. Scale bars, 200 nm. **(c)** IEM  
841 of GFP-spNup131 and spMis6-GFP. **(d)** IEM of GFP-spNup132.

842

843 **Figure 2. IEM of *S. pombe* Nups.** Immunogold distribution of the projected  
844 immunoelectron micrographs is shown as a quantitative representation for each Nup  
845 (see Materials and Methods for details). **(a)** Nup107–160 subcomplex Nups. **(b)** Nup93  
846 subcomplex Nups. **(c)** Channel Nups. IEM for spNup98 was performed using  
847 anti-GLFG repeats antibody for the wild type strain and anti-GFP antibody for the  
848 spNup98-GFP strain. **(d)** Nsp1. **(e)** Cytoplasmic Nups. **(f)** Nuclear basket Nups. **(g)**  
849 Transmembrane Nups.

850

851 **Figure 2–figure supplement 1. Phylogenetic tree of Nup93-like proteins.**

852 Species names and Genebank accession numbers are shown. spNpp106- and

853 spNup97-like proteins found in fission yeasts are colored. Amino acid sequences were  
854 analyzed as described in **Figure 1–figure supplement 1**.

855

856 **Figure 3–figure supplement 1. Gels for MS analysis of immunoprecipitates with**  
857 **GFP or GFP-tagged Nups.**

858 Images of Coomassie-stained SDS-PAGE gels are shown. Arrows indicate positions of  
859 GFP-tagged proteins. Dots indicate the positions of molecular weight marker proteins  
860 shown at the far left.

861

862 **Figure 3.** Heat map of semi-quantified abundance (emPAI) of nucleoporins. Nups on  
863 the top row are nucleoporins detected by MS analysis of the sample precipitated with  
864 each GFP-Nup as a bait. The color code was determined using emPAI values. White  
865 boxes indicate no Nups detected. Blue boxes indicate subcomplexes with mutual  
866 connections between components. Pink boxes indicate subcomplexes with connections  
867 to other subcomplexes.

868

869 **Figure 4.** Interactions *S. pombe* Nup107-160 subcomplex Nups. **(a)** Yeast two-hybrid  
870 assay of spNup131, spNup132, spNup107, spNup96, spNup85, and spNup120. AD,  
871 transcriptional activation domain; BD, DNA-binding domain. BD-fused spNup120 and  
872 BD-fused spNup85 were not used in this experiment because they themselves showed  
873 transcriptional activation activity. **(b)** Yeast three-hybrid assay of spNup96, spNup85,  
874 and spNup120. BD-spNup96 or BD alone was expressed with or without spNup85  
875 expression from a BD vector. **(c)** Yeast two-hybrid assay of spEly5, spNup37, spSeh1  
876 plus spNup85, and spNup120. **(d)** Yeast three-hybrid assay of spEly5, spNup37, and

877 spNup120. BD-spEly5 or BD alone was expressed with or without spNup37. **(e)** Yeast  
878 two-hybrid assay of spEly5 and spNup37.

879

880 **Figure 5.** Model of the *S. pombe* NPC. Positions of each subcomplex were deduced  
881 according to IEM and mass spectrometry results in this study. Solid line indicates the  
882 direct interaction of Nups demonstrated by yeast two-hybrid assays. Broken line  
883 indicates the interaction of Nups demonstrated by mass spectrometry.

884

885 **Figure 6.** Localization of the spNup131 and spNup132 domains. **(a)** Schematics of the  
886 spNup131 and spNup132 fragments. **(b)** Localization of spNup131 and spNup132  
887 fragments as determined by FM. GFP-fused fragments were expressed under the  
888 spNup132 promoter in the background of the *nup131Δ nup132Δ* double mutant.  
889 spCut11-mCherry served as an NPC marker. Scale bar, 5 μm. **(c)** IEM of the spNup131  
890 and spNup132 fragments. Projection images (left) and immunogold distributions (right)  
891 are shown as described in the legend of **Fig.1(c)**. The red points indicate the pore  
892 centers. **(d)** Yeast two-hybrid assay. AD and BD indicate the transcriptional activation  
893 domain and the DNA binding domain, respectively.

894

895 **Figure 7.** Localization and functional analysis of spNup96-spNup107 fusion Nup. **(a)**  
896 Western Blot analysis of the spNup96-spNup107-GFP fusion protein. Asterisks  
897 represent non-specific cross reactions of anti-GFP antibody. **(b)** IEM of the  
898 spNup96-spNup107 fusion protein. Immunogold distribution of the projected  
899 immunoelectron micrographs is shown. **(c)** IEM of GFP-spNup132 in the background  
900 of spNup96-spNup107 fusion. **(d)** A cell growth assay in the presence (+TBZ) or

901 absence (-TBZ) of the microtubule-destabilizing drug TBZ. Five-fold serial dilutions of  
902 wild type and spNup96-spNup107 fusion strain were spotted on YES medium  
903 containing or lacking TBZ and incubated for 3 days. **(e)** Time-lapse observation of *S.*  
904 *pombe* cells (wt or spNup96-spNup107 fusion strain) undergoing meiosis. Cells  
905 expressing mCherry-fused  $\alpha$ -tubulin (spAtb2) were induced to enter meiosis. The  
906 duration of meiosis I and II was determined as the time the spindle was present. Dotted  
907 lines show cell shapes. The time 0 indicates a time for the first appearance of meiosis I  
908 spindle formation. Representative images are shown (number of cells observed: 32 for  
909 wild type and 33 for spNup96-spNup107). **(f)** Statistical analysis for images obtained in  
910 **(e)**. Duration of meiosis I and II. Error bars represent standard deviations. The duration  
911 of meiosis I was  $28.4 \pm 3.0$  min in wild type and  $37.9 \pm 6.3$  min in spNup96-spNup107  
912 fusion cells. The duration of meiosis II was  $25.8 \pm 1.8$  min in wild type and  $29.8 \pm 2.9$   
913 min in spNup96-spNup107 fusion cells. Asterisks indicate statistical significance ( $p <$   
914  $0.0001$ ) between indicated strains as revealed by Welch's t-test. Number of cells  
915 observed: 32 for wild type and 33 for spNup96-spNup107. **(g)** Abnormal spore  
916 formation was observed in the background of spNup96-spNup107 fusion. More than  
917 200 asci were counted for each strain.

918

919 **Figure 8.** spNup131 interacts with spFar8. **(a)** spFar8-GFP localizes at the nuclear  
920 periphery in an spNup131-dependent manner. Far8-GFP was expressed in the indicated  
921 strains, and cells exponentially growing in EMM2 liquid medium were observed by FM.  
922 spCut11-mCherry was observed as an NPC marker. Scale bar, 10  $\mu$ m. **(b)**  
923 NPC-dependent localization of spFar8-GFP. Wild type and *nup132 $\Delta$*  cells expressing  
924 spFar8-GFP were cultured on a YES agar plate at 30°C for 3 days and observed by FM.



925 spCut11-mCherry was observed as an NPC marker. Scale bar, 10  $\mu$ m. **(c)** Western blot  
926 analysis of spFar8-GFP. Whole cell extracts were prepared from wild type, *nup131* $\Delta$ ,  
927 and *nup132* $\Delta$  cells expressing spFar8-GFP and subjected to SDS-PAGE and Western  
928 blot analysis. spFar8-GFP was detected with anti-GFP antibody. spNup98 was detected  
929 by the anti-Nup98 antibody 13C2 for a loading control. An arrow indicates the position  
930 of spFar8-GFP. **(d)** spNup131-dependent localization of spFar11-GFP. Cells were  
931 prepared and observed as described in **(a)**. Scale bar, 10  $\mu$ m.

## Asakawa et al. Figure 1

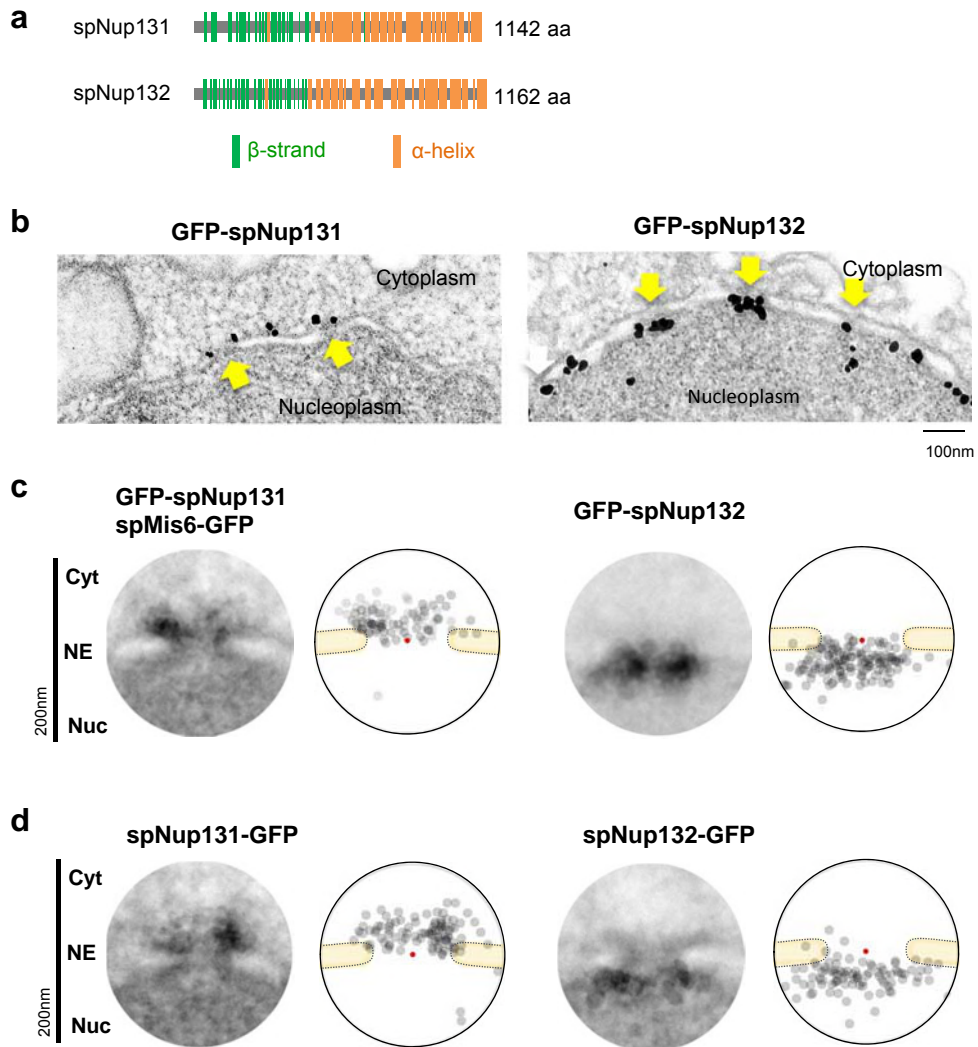

## Asakawa et al. Figure 1–figure supplement 1

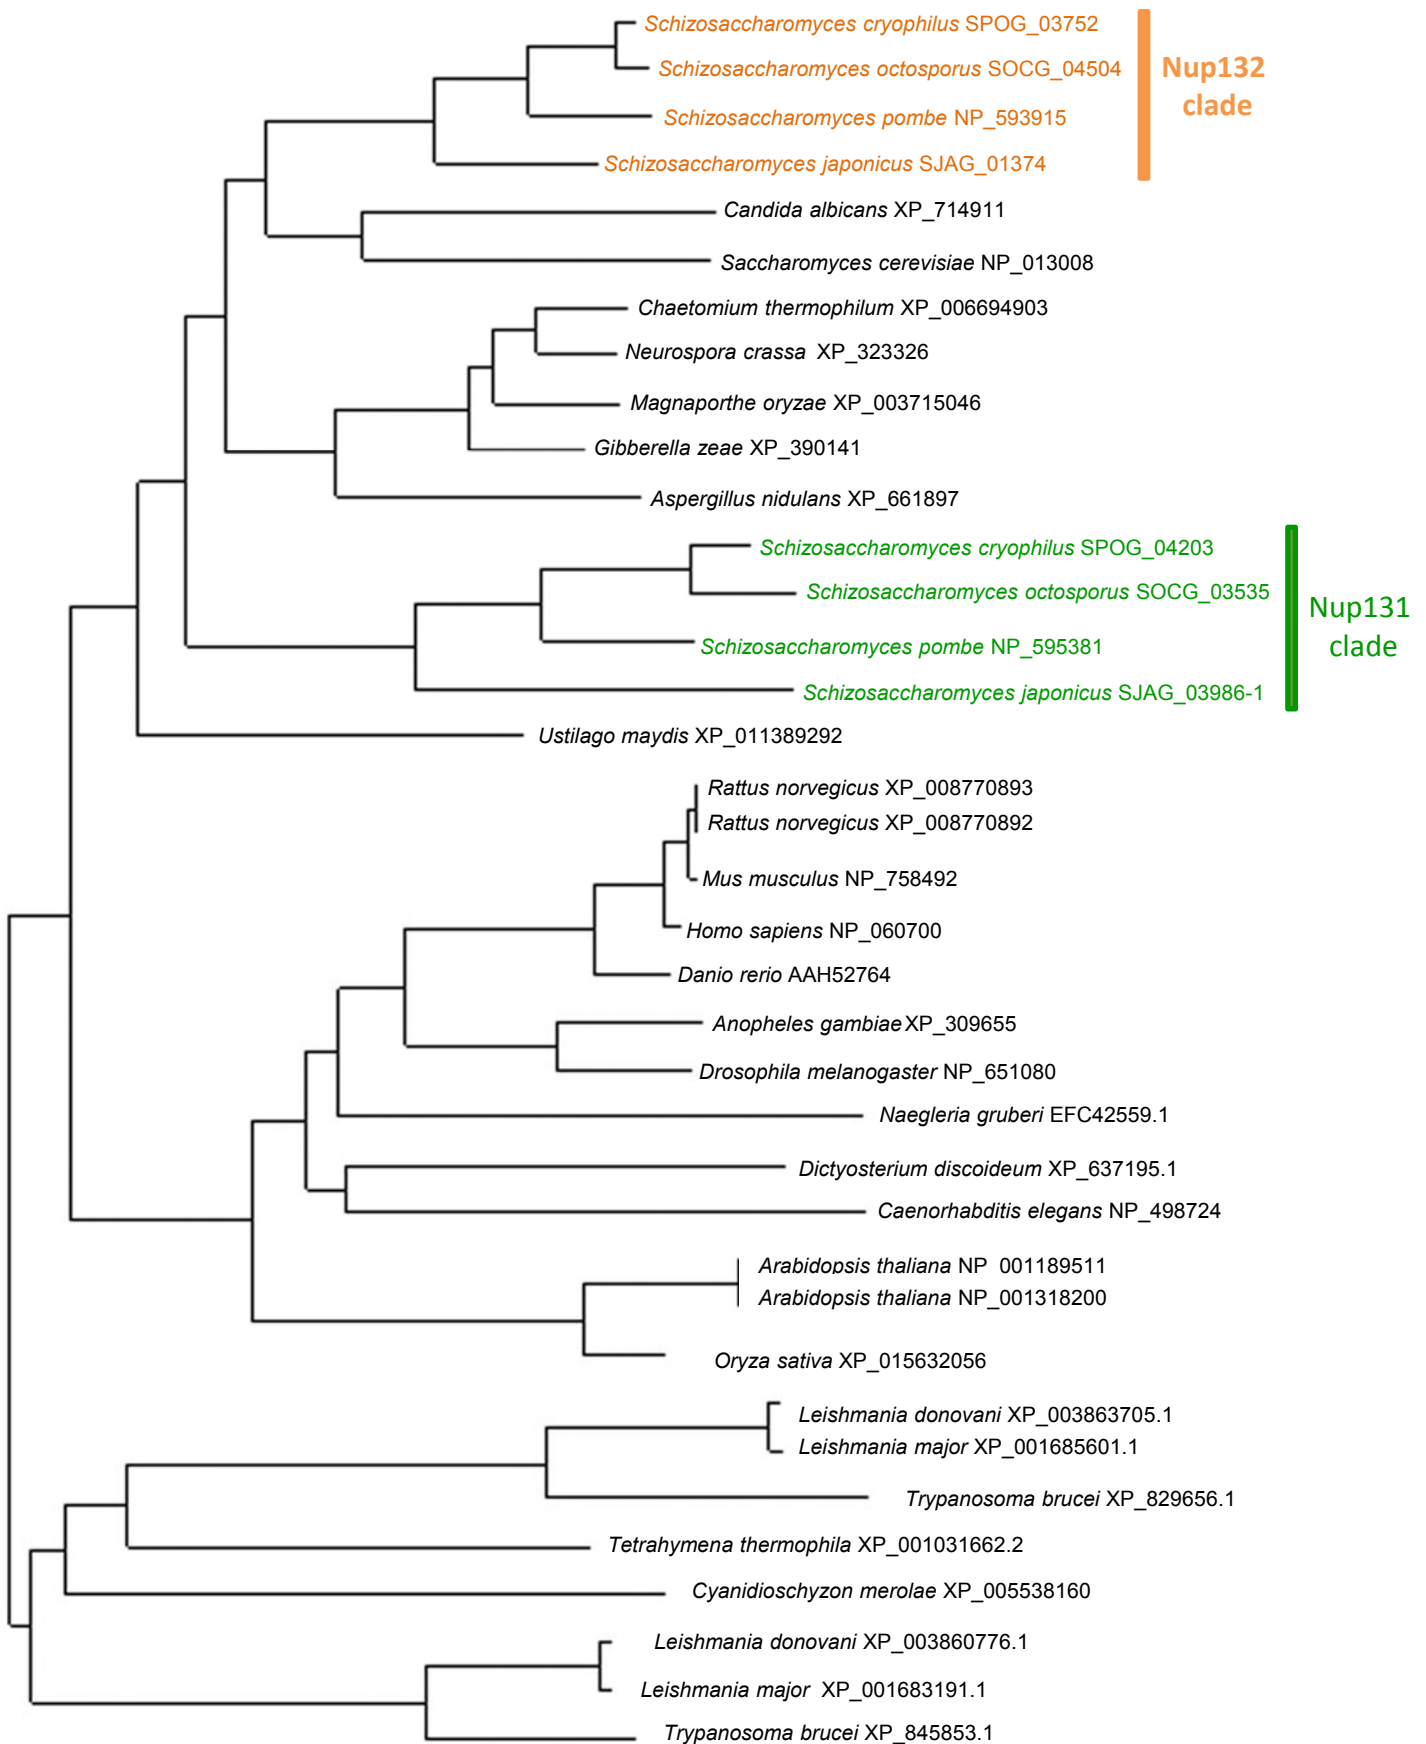

## Asakawa et al. Figure 1–figure supplement 2

**a** spMis6-GFP

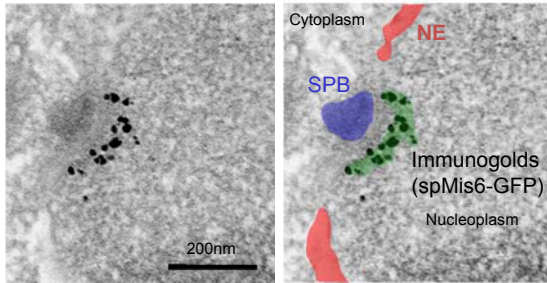

**b** GFP-spNup131, spMis6-GFP

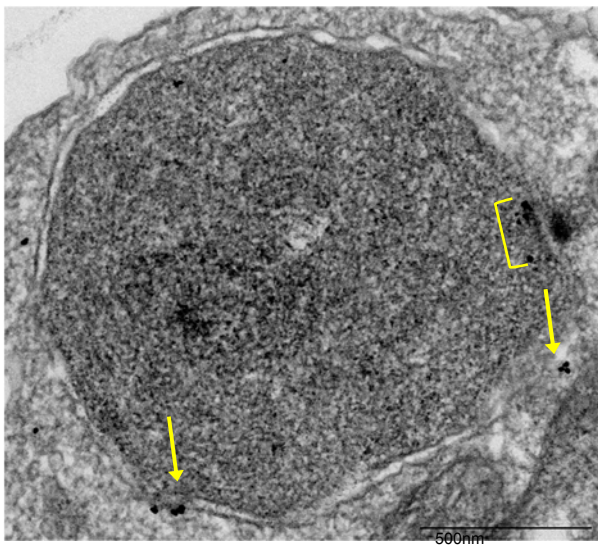

**c** GFP-spNup131, spMis6-GFP

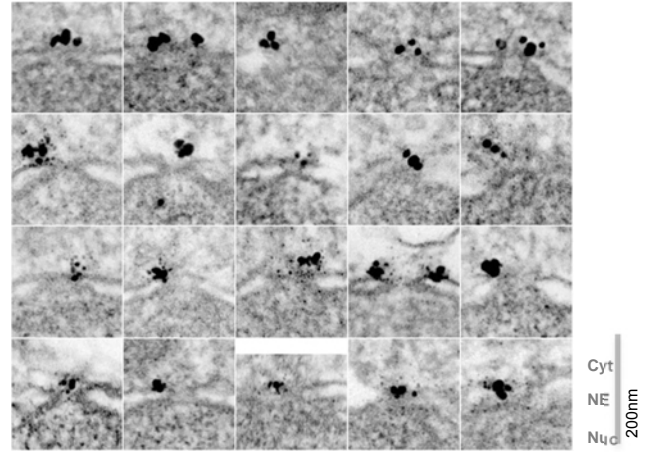

**d** GFP-spNup132

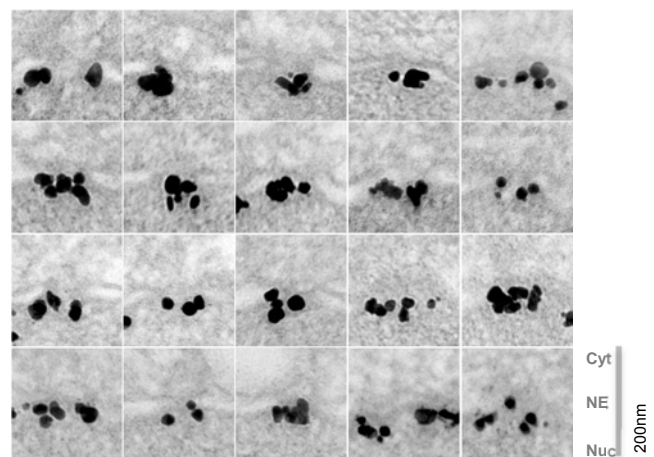

## Asakawa et al. Figure 2

### a Nup107-160 subcomplex

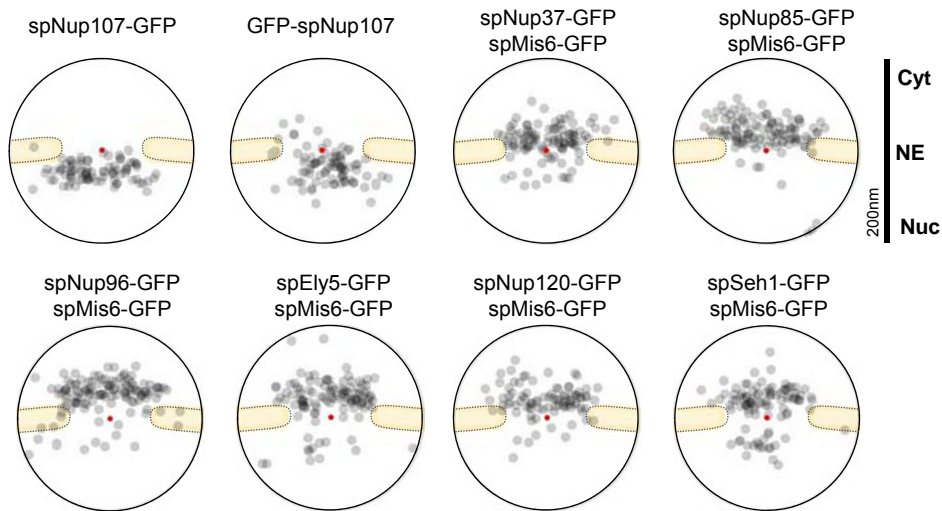

### b Nup93 subcomplex

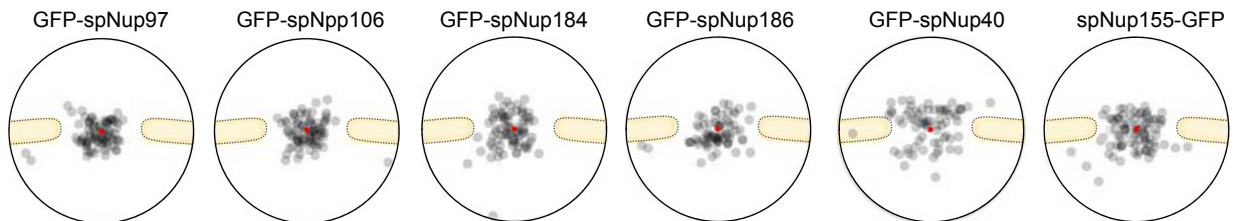

### c Channel Nups

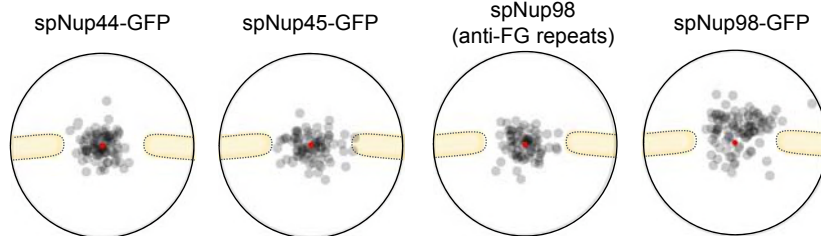

### d

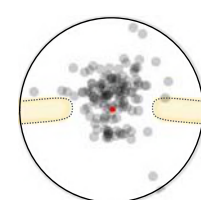

### e Cytoplasmic ring

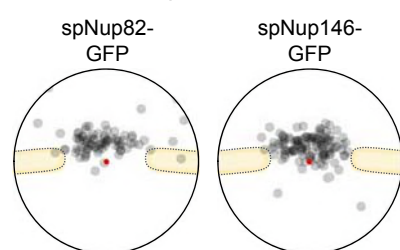

### f Nuclear basket

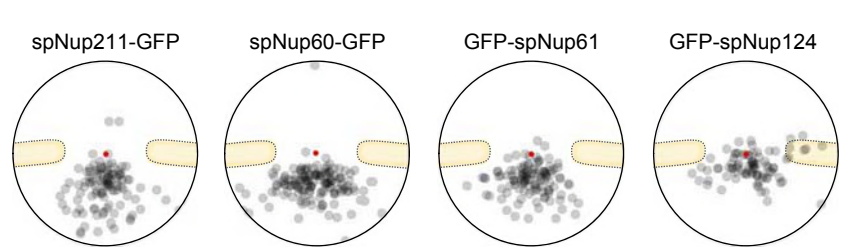

### g Transmembrane Nups

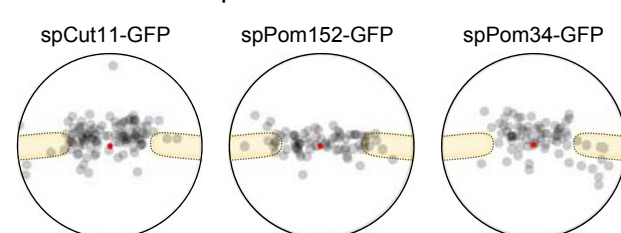

## Asakawa et al. Figure 2–figure supplement 1

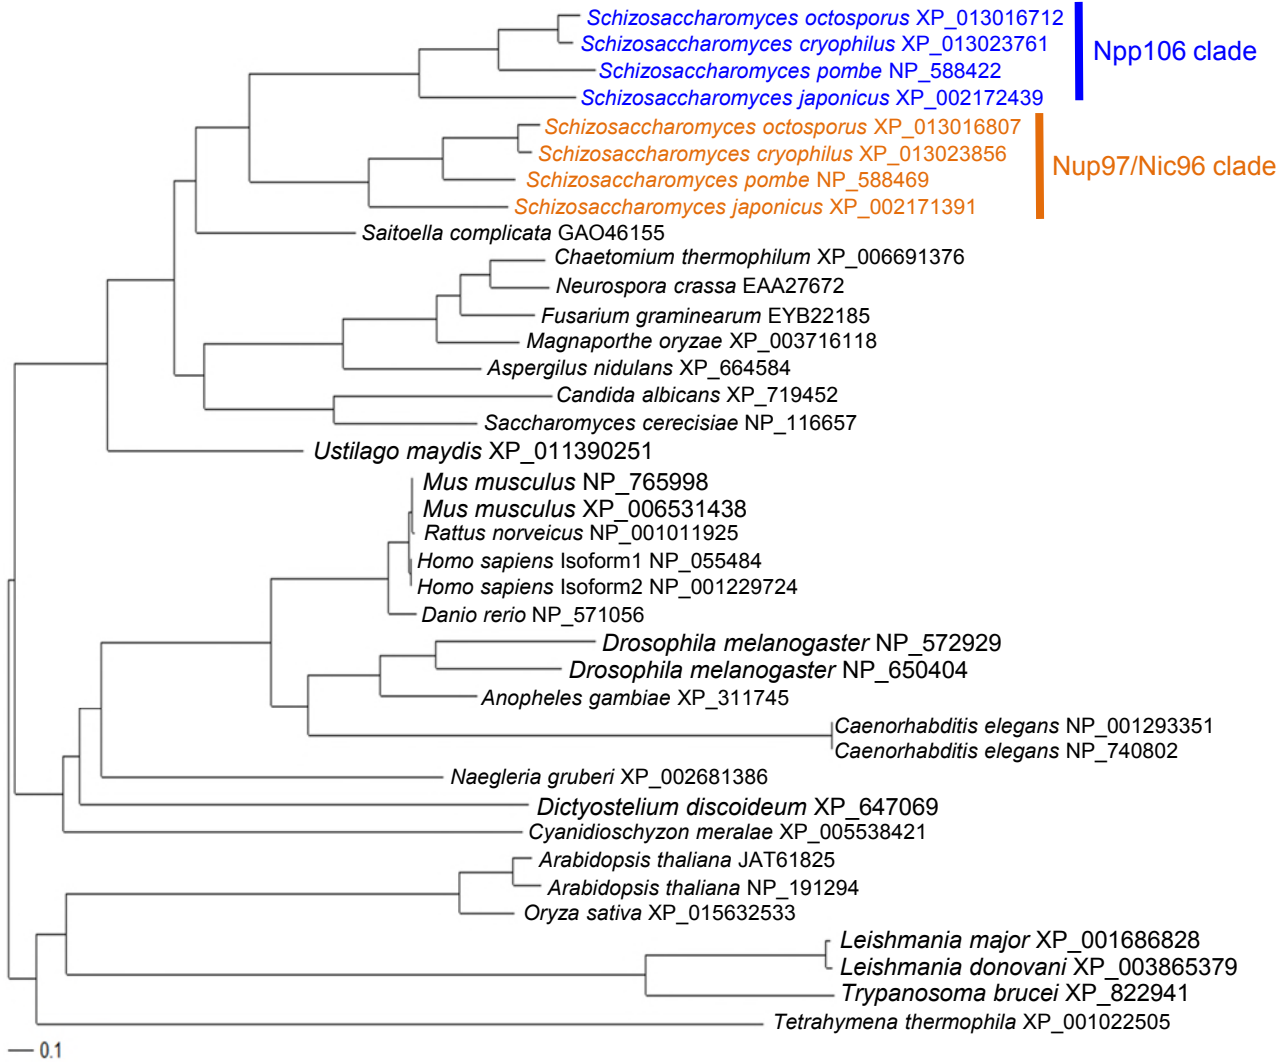

## Asakawa et al. Figure 3

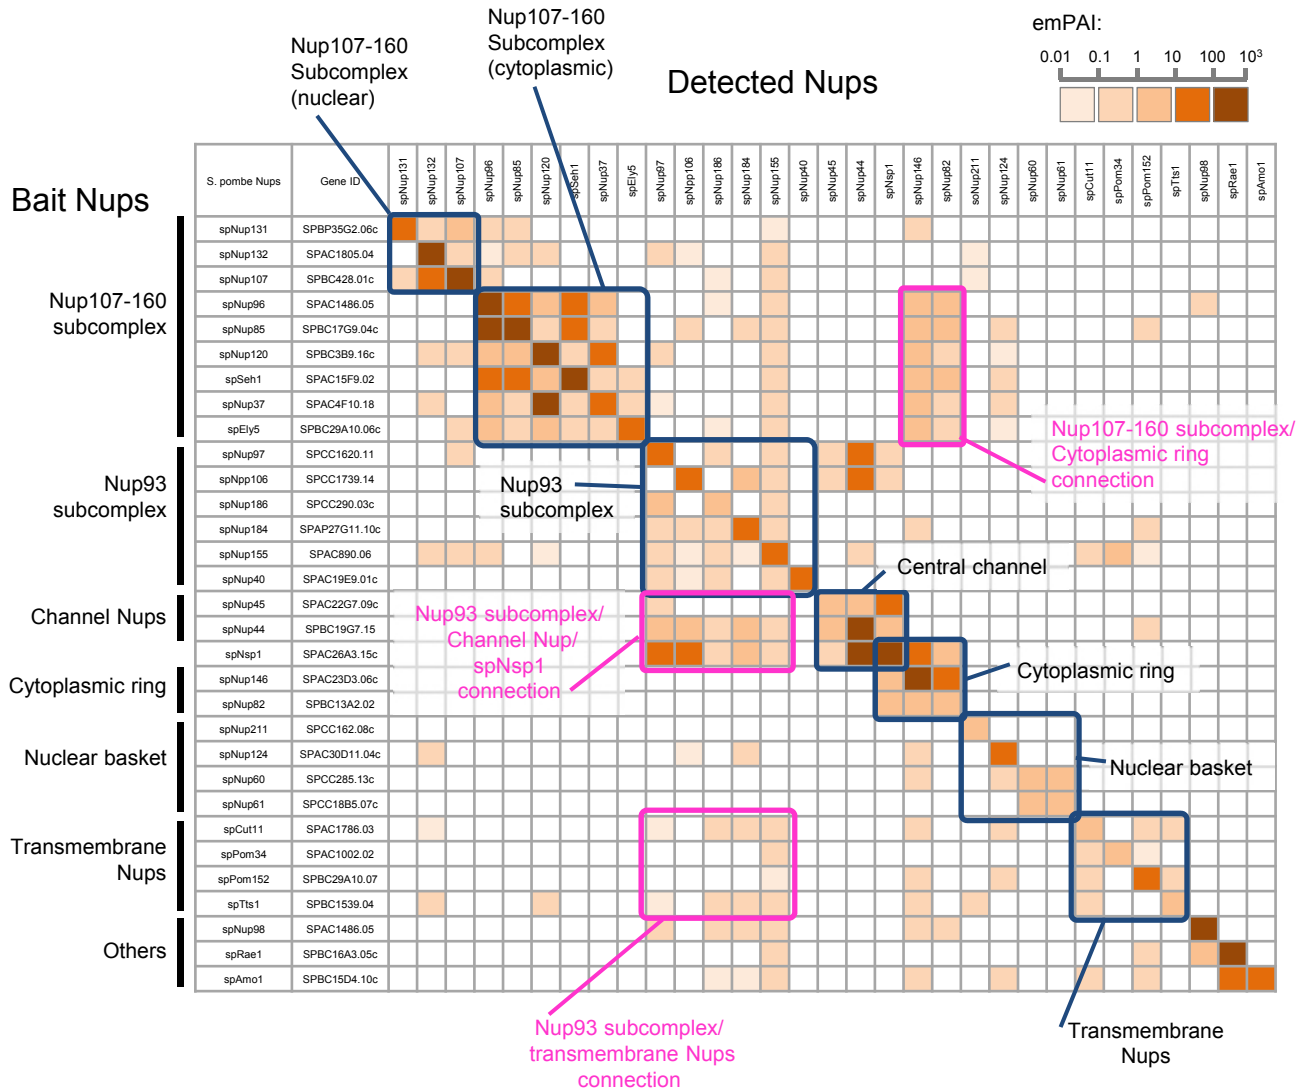

# Asakawa et al. Figure 3—figure supplement 1

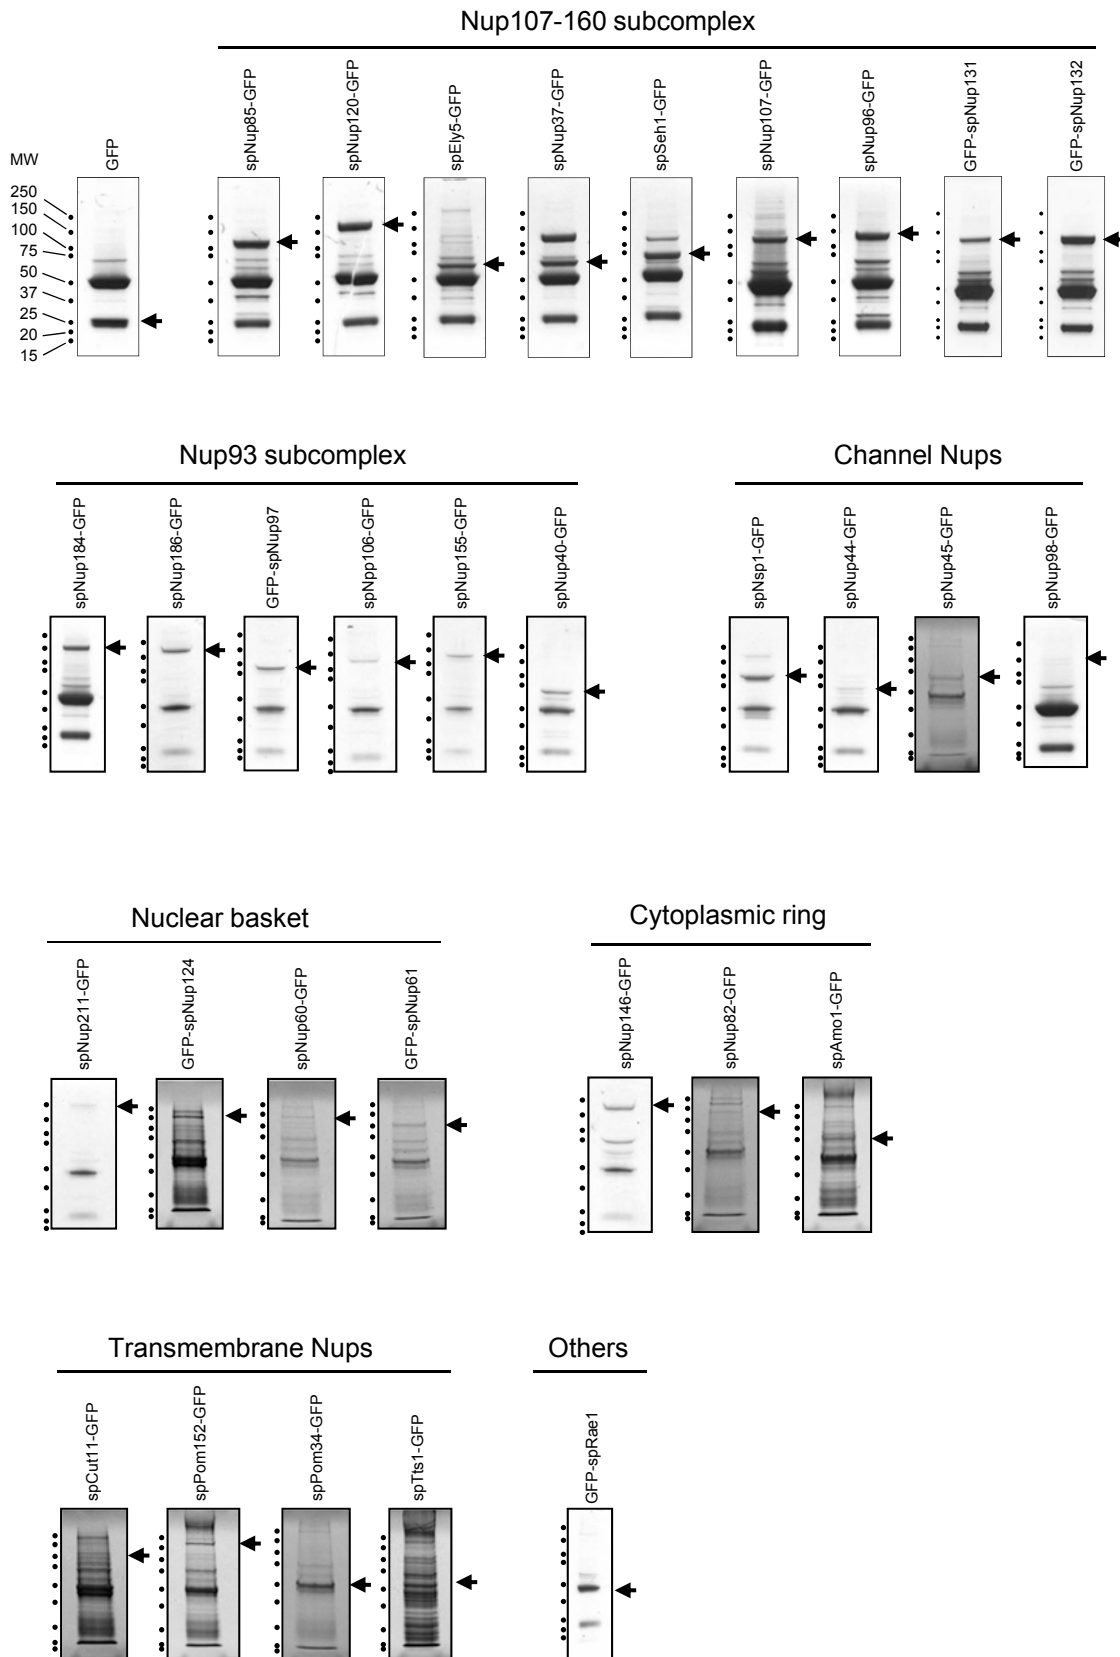



## Asakawa et al. Figure 4

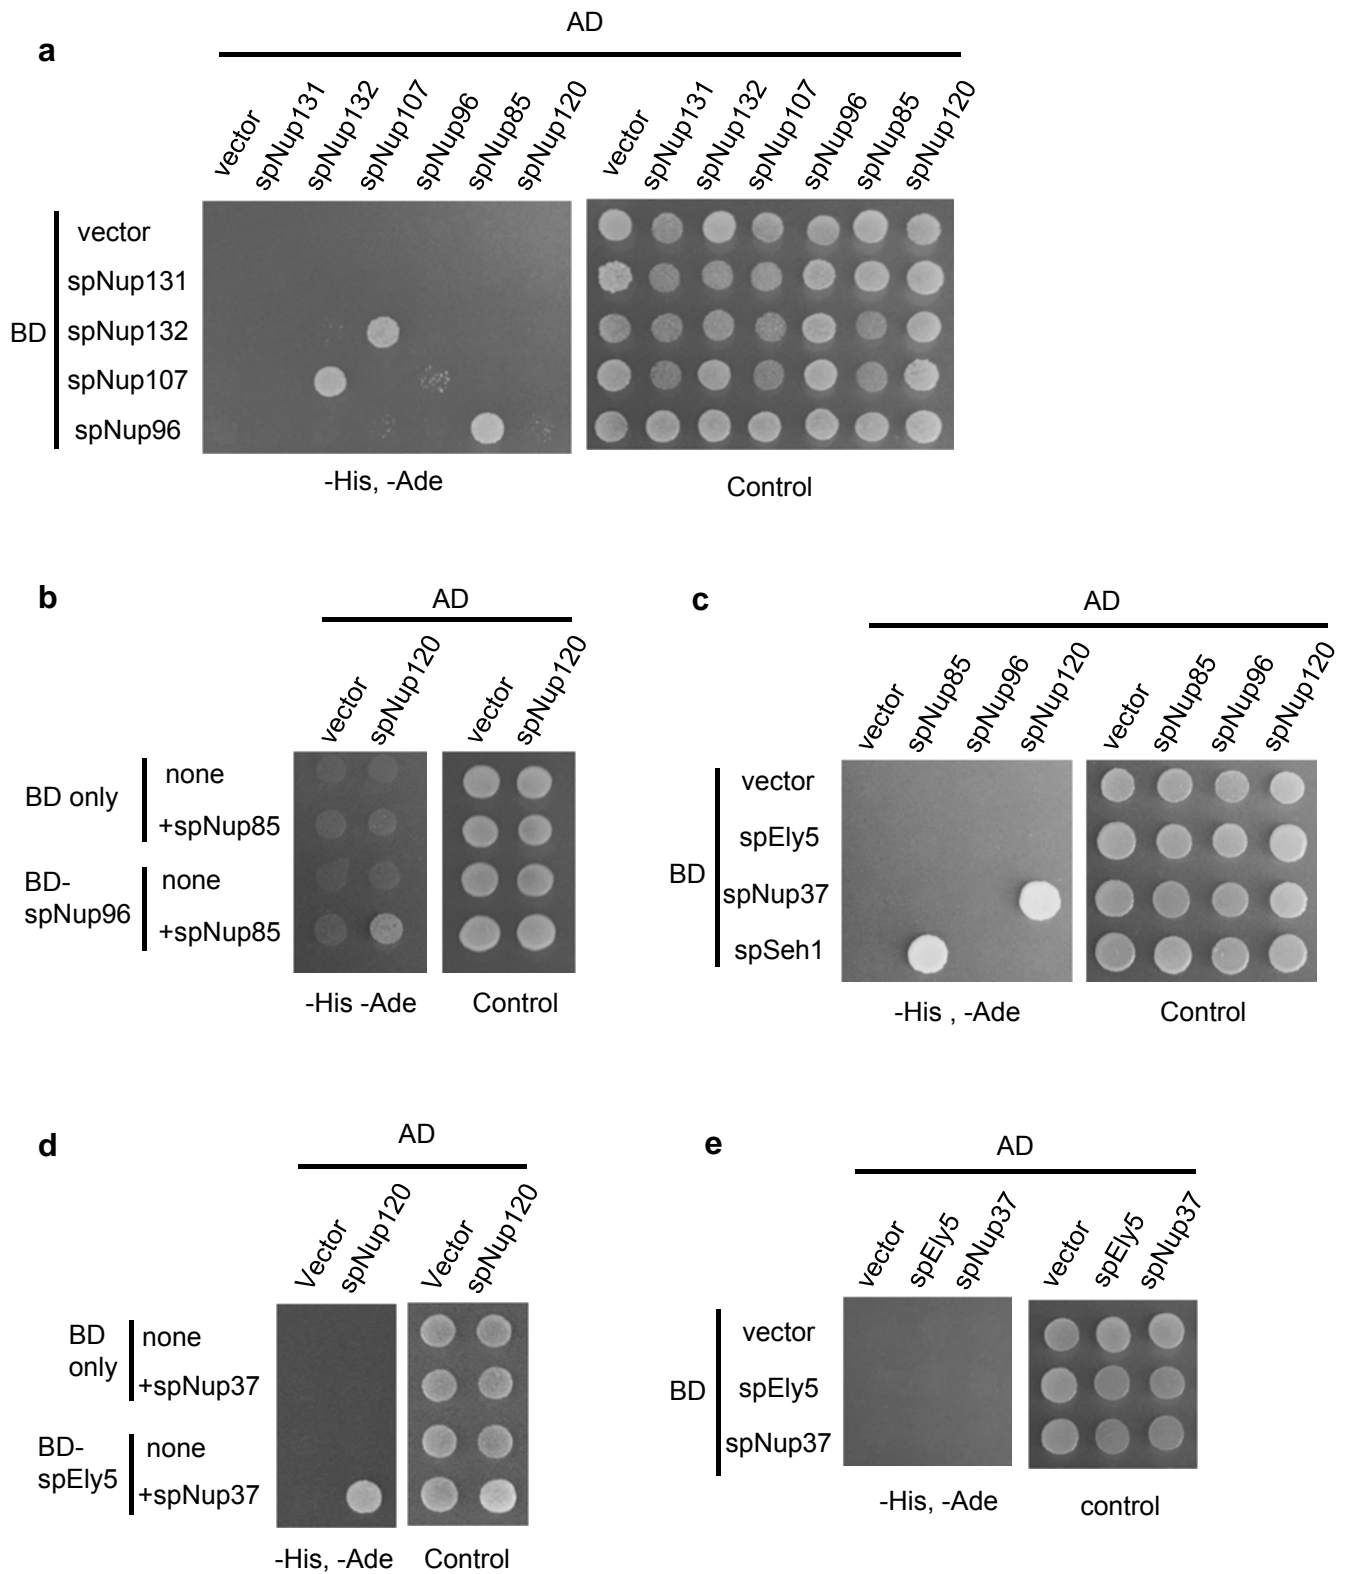

## Asakawa et al. Figure 5

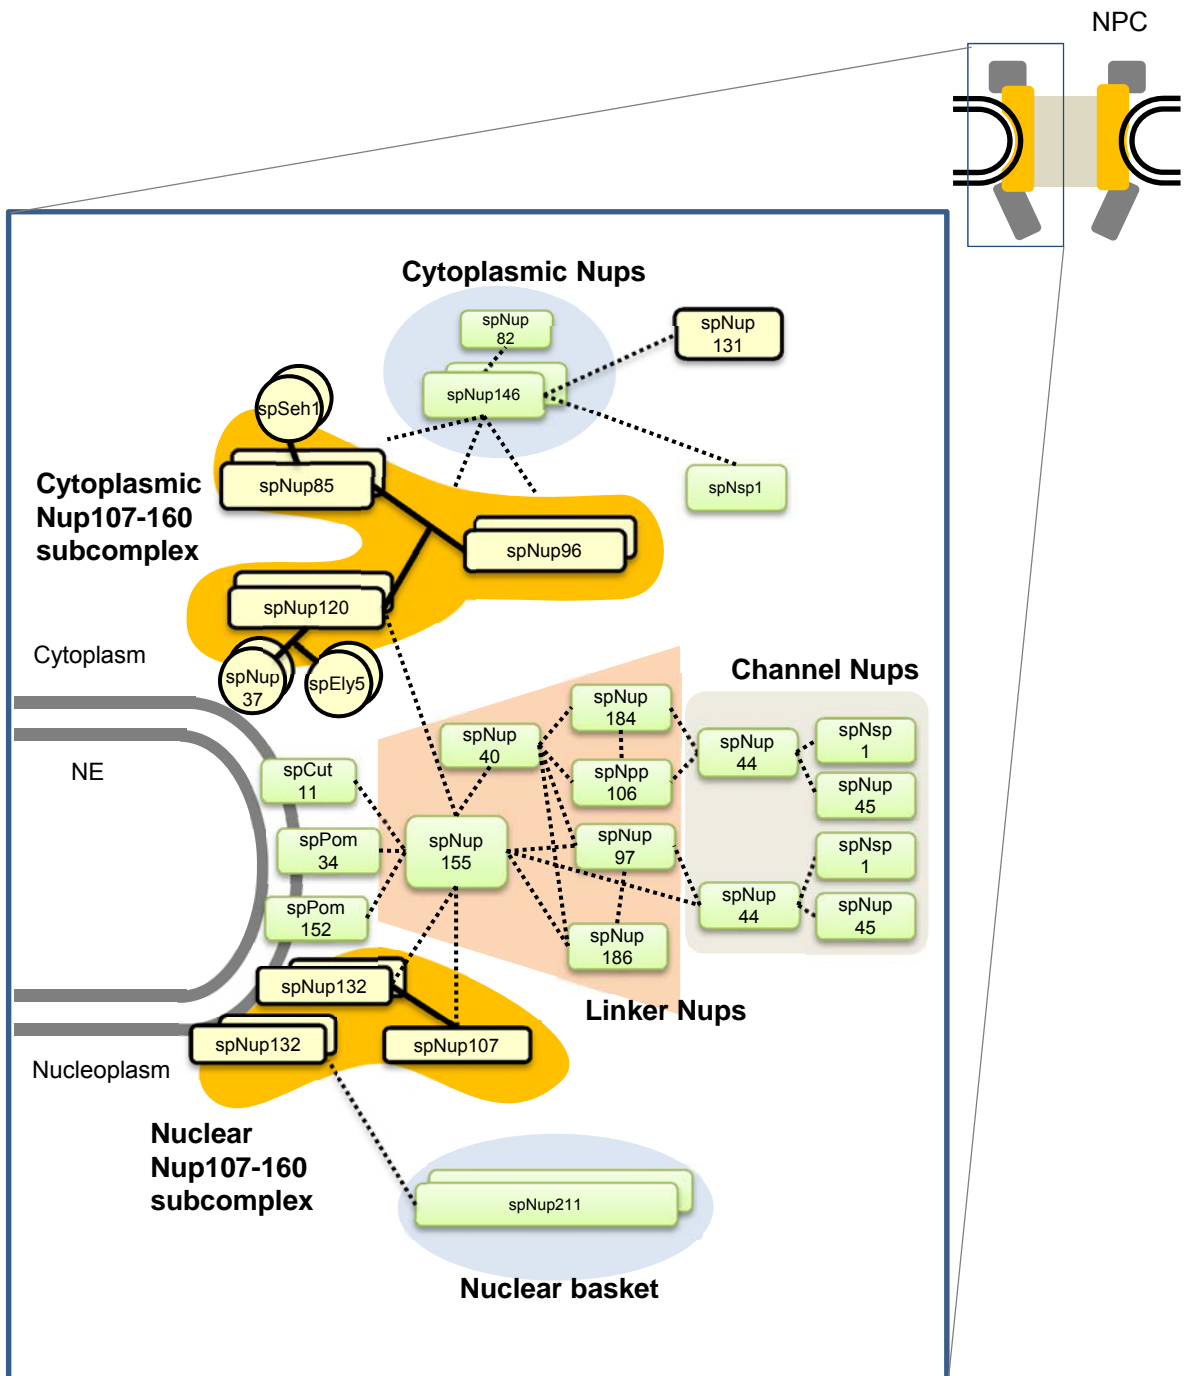

## Asakawa et al. Figure 6

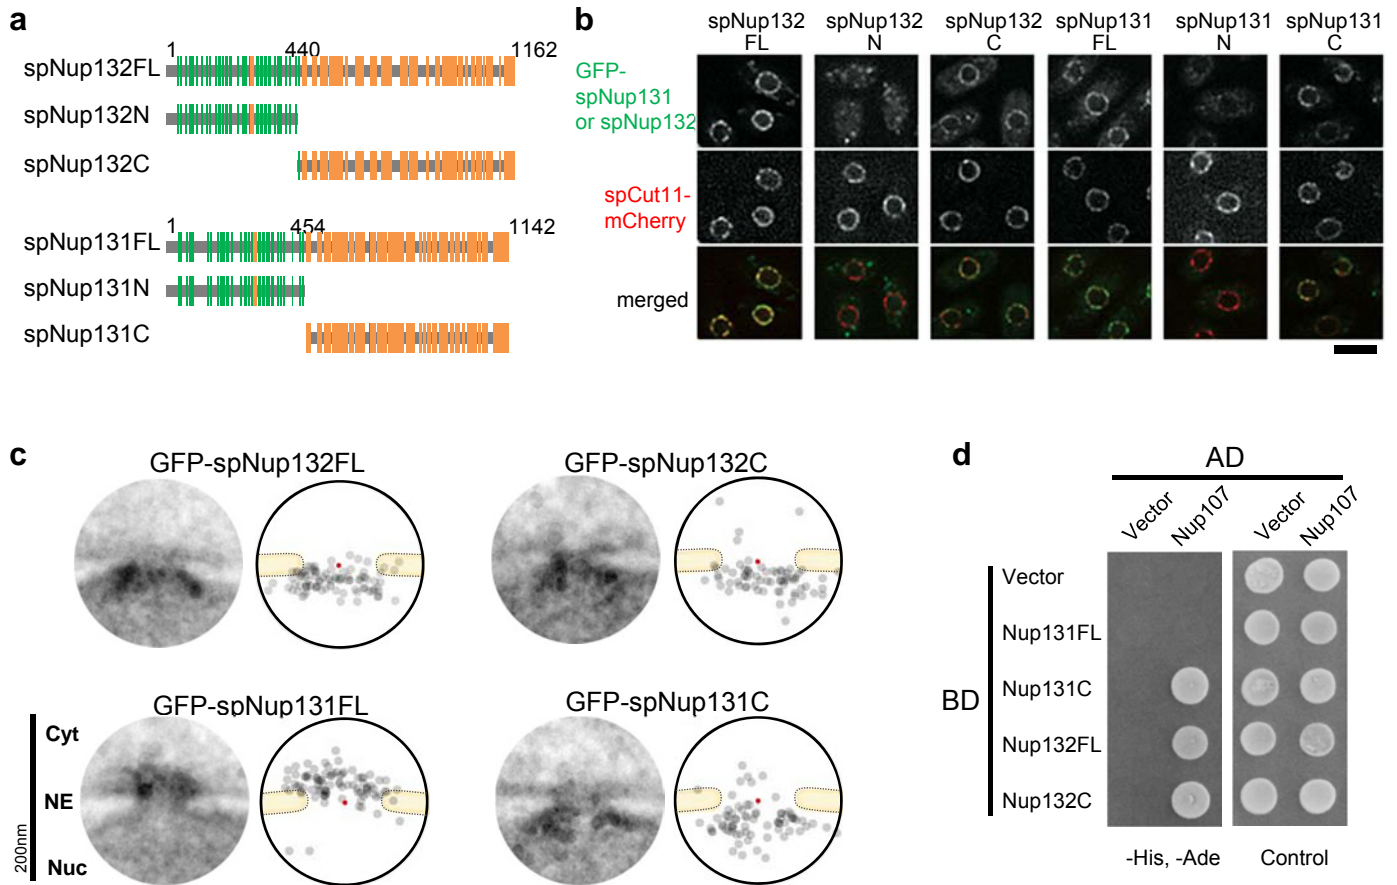

## Asakawa et al. Figure 7

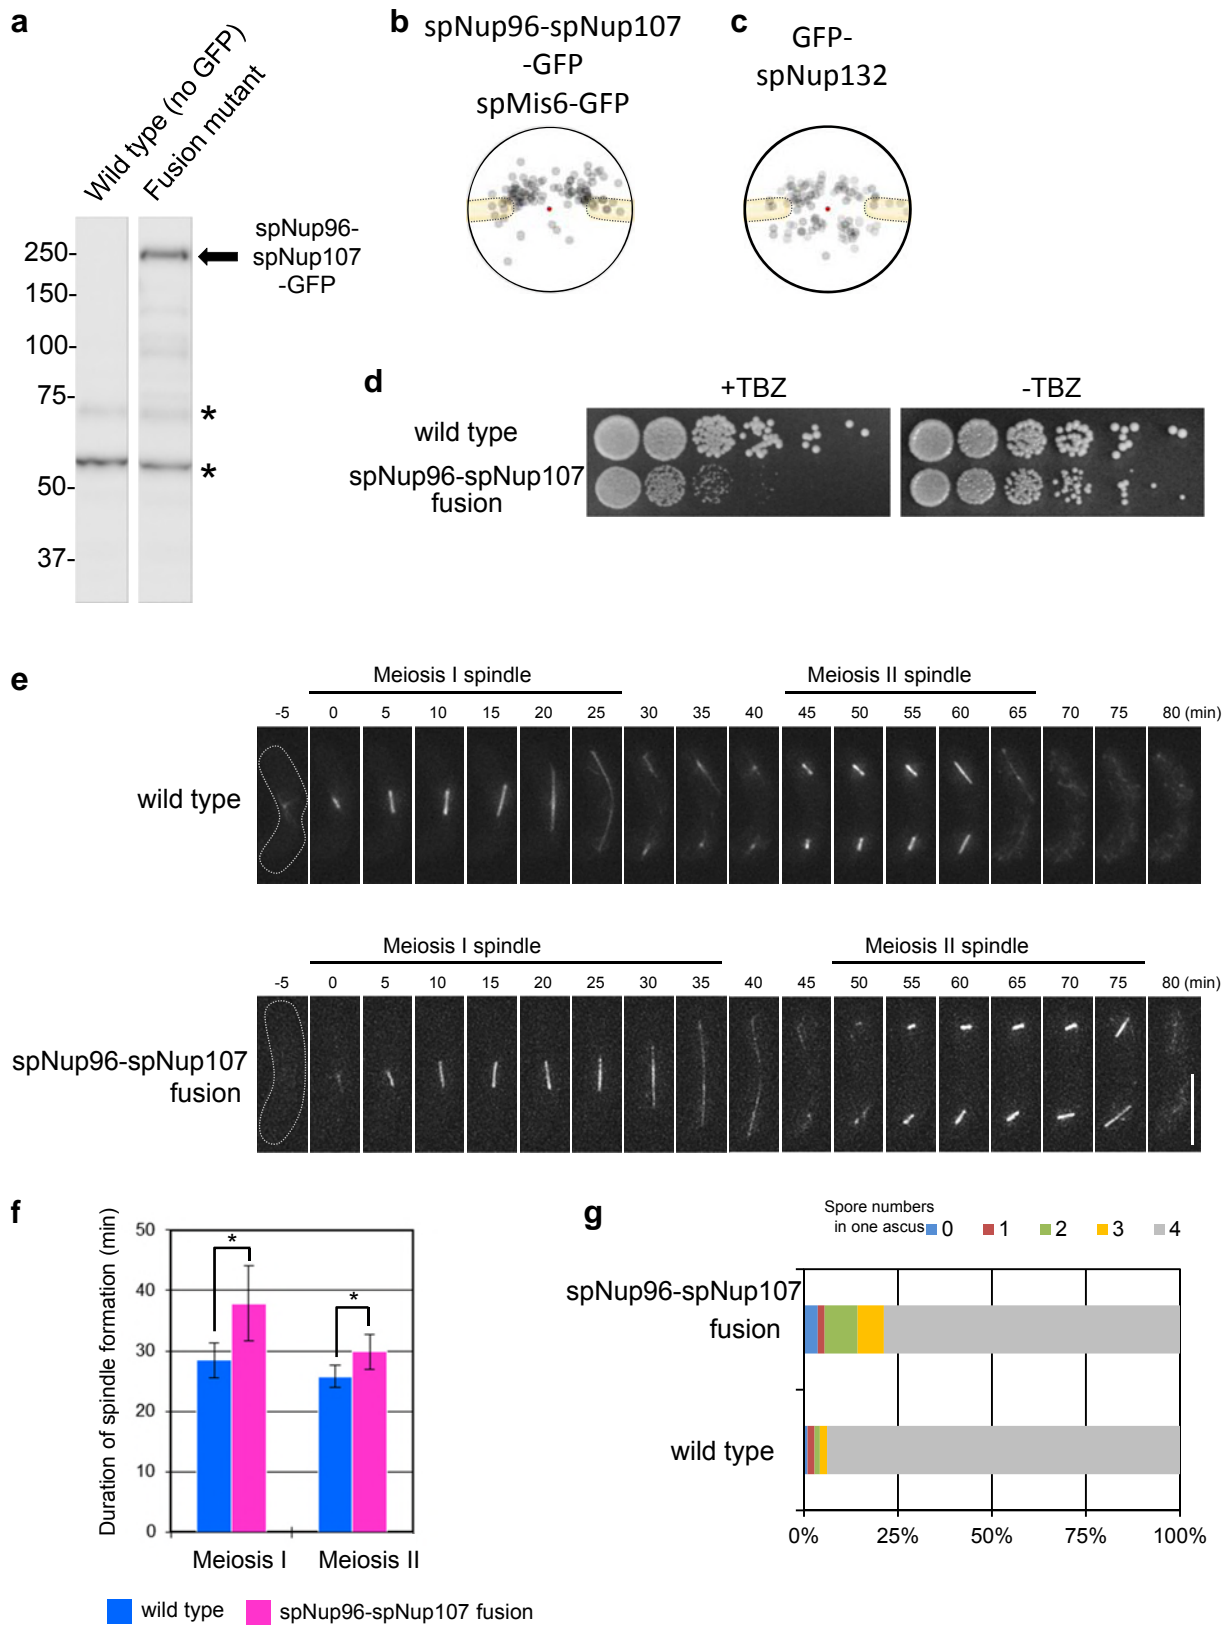

## Asakawa et al. Figure 8

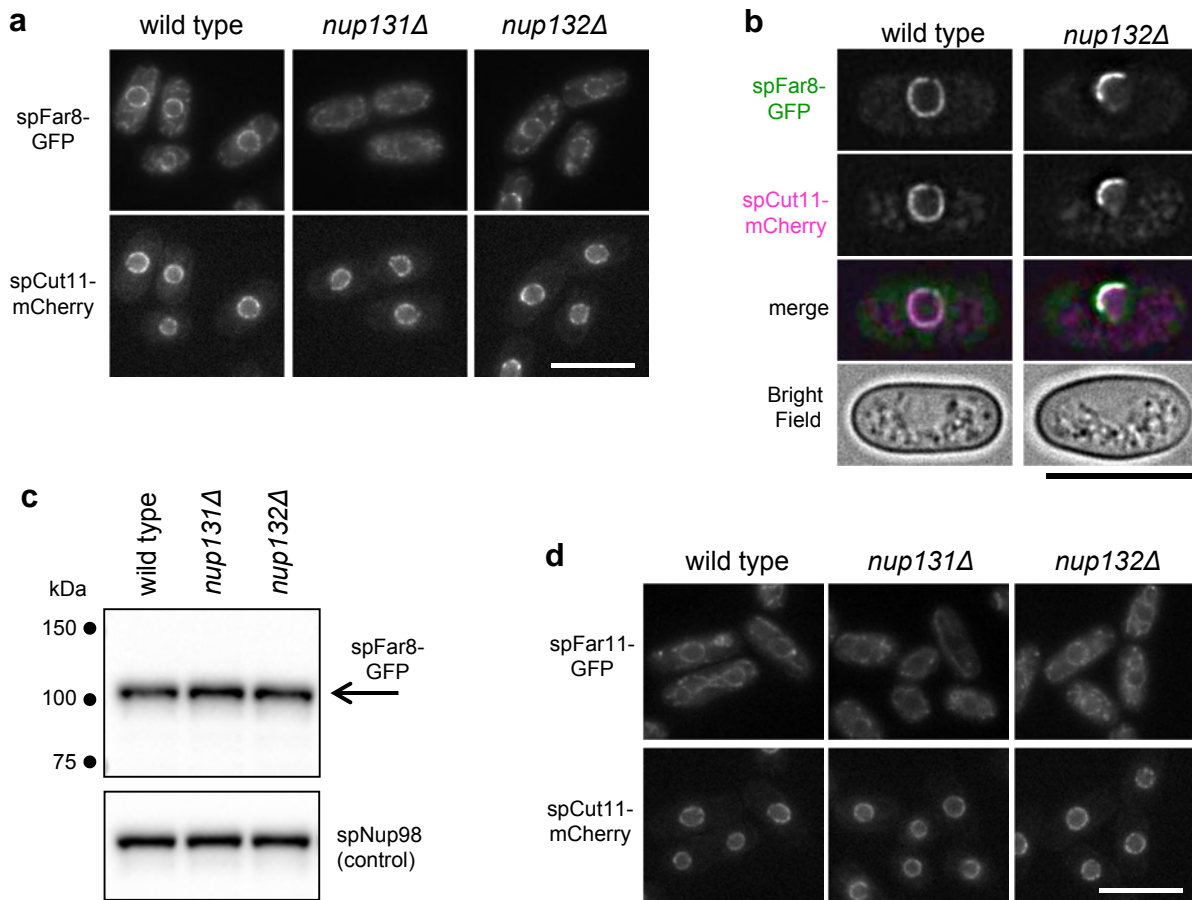

Source: http://biorxiv.org/content/10.1101/223131v1.full.pdf
