1 **Asymmetrical localization of Nup107-160 subcomplex components within the**  
2 **nuclear pore complex in fission yeast**

3

4 \*Haruhiko Asakawa<sup>1</sup>, Tomoko Kojidani<sup>2,3</sup>, Hui-Ju Yang<sup>1</sup>, Chizuru Ohtsuki<sup>1</sup>, Hiroko  
5 Osakada<sup>2</sup>, Atsushi Matsuda<sup>2</sup>, Masaaki Iwamoto<sup>2</sup>, Yuji Chikashige<sup>2</sup>, Koji Nagao<sup>4,5</sup>,  
6 Chikashi Obuse<sup>4,5</sup>, \*Yasushi Hiraoka<sup>1,2</sup> & \*Tokuko Haraguchi<sup>1,2</sup>

7

8 <sup>1</sup> Graduate School of Frontier Biosciences, Osaka University, Suita, Japan

9 <sup>2</sup> Advanced ICT Research Institute Kobe, National Institute of Information and  
10 Communications Technology, Kobe, Japan

11 <sup>3</sup> Department of Chemical and Biological Sciences, Faculty of Science, Japan Women's  
12 University, Tokyo, Japan

13 <sup>4</sup> Graduate School of Life Science, Hokkaido University, Sapporo, Japan.

14 <sup>5</sup> Graduate School of Science, Osaka University, Toyonaka, Japan.

15

16 \*Corresponding authors:

17 Tokuko Haraguchi

18 e-mail: tokuko@nict.go.jp

19 Yasushi Hiraoka

20 e-mail: hiraoka@fbs.osaka-u.ac.jp

21 Haruhiko Asakawa

22 e-mail: askw@fbs.osaka-u.ac.jp

23

24 **Abstract**

25 The nuclear pore complex (NPC) forms a gateway for nucleocytoplasmic transport. The  
26 outer ring protein complex of the NPC (the Nup107-160 subcomplex in humans) is a key  
27 component for building the NPC. Nup107-160 subcomplexes are believed to be  
28 symmetrically localized on the nuclear and cytoplasmic sides of the NPC. However, in *S.*  
29 *pombe* immunoelectron and fluorescence microscopic analyses revealed that the  
30 homologous components of the human Nup107-160 subcomplex had an asymmetrical  
31 localization: constituent proteins spNup132 and spNup107 were present only on the  
32 nuclear side (designated the spNup132 subcomplex), while spNup131, spNup120,  
33 spNup85, spNup96, spNup37, spEly5 and spSeh1 were localized only on the cytoplasmic  
34 side (designated the spNup120 subcomplex), suggesting the complex was split into two  
35 pieces at the interface between spNup96 and spNup107. This contrasts with the  
36 symmetrical localization reported in other organisms. Fusion of spNup96 (cytoplasmic  
37 localization) with spNup107 (nuclear localization) caused cytoplasmic relocation of  
38 spNup107. In this strain, half of the spNup132 proteins, which interact with spNup107,  
39 changed their localization to the cytoplasmic side of the NPC, leading to defects in  
40 mitotic and meiotic progression similar to an spNup132 deletion strain. These  
41 observations suggest the asymmetrical localization of the outer ring spNup132 and  
42 spNup120 subcomplexes of the NPC is necessary for normal cell cycle progression in  
43 fission yeast.

44

45

46 **Author summary**

47 The nuclear pore complexes (NPCs) form gateways to transport intracellular molecules  
48 between the nucleus and the cytoplasm across the nuclear envelope. The Nup107-160  
49 subcomplex, that forms nuclear and cytoplasmic outer rings, is a key complex  
50 responsible for building the NPC by symmetrical localization on the nuclear and  
51 cytoplasmic sides of the nuclear pore. This structural characteristic was found in various  
52 organisms including humans and budding yeasts, and therefore believed to be common  
53 among “all” eukaryotes. However, in this paper, we revealed an asymmetrical  
54 localization of the homologous components of the human Nup107-160 subcomplex in  
55 fission yeast by immunoelectron and fluorescence microscopic analyses: in this  
56 organism, the Nup107-160 subcomplex is split into two pieces, and each of the split  
57 pieces is differentially distributed to the nuclear and cytoplasmic side of the NPC: one  
58 piece is only in the nuclear side while the other piece is only in the cytoplasmic side.  
59 This contrasts with the symmetrical localization reported in other organisms. In addition,  
60 we confirmed that the asymmetrical configuration of the outer ring structure is  
61 necessary for cell cycle progression in fission yeast. This study provides notions of  
62 diverse structures and functions of NPCs evolved in eukaryotes.

63

64

65 **Keywords:** nuclear pore complex, nucleoporin, Nup133, Y-complex, immunoelectron  
66 microscopy, fluorescence microscopy

67

68 **Introduction**

69 In eukaryotes, the nuclear envelope (NE) separates the nucleus from the cytoplasm.  
70 Molecular transport between the nucleus and cytoplasm across the NE occurs through  
71 nuclear pore complexes (NPCs). These complexes are cylindrical, eight-fold  
72 symmetrical structures that perforate the NE and are made of multiple sets of about 30  
73 different protein species known as nucleoporins (Nups) [1–3]. Nups are classified into  
74 three groups: transmembrane Nups, FG repeat Nups, and scaffold Nups.  
75 Transmembrane Nups have transmembrane helices and anchor NPCs to the NE. FG  
76 repeat Nups contain phenylalanine-glycine (FG) rich repeats and are involved in  
77 molecular transport through the NPC cylinder structure. Scaffold Nups form two inner  
78 rings and two outer rings, which serve as the NPC structural core [4–7], and associate  
79 with the membrane through interactions with transmembrane Nups [3,8,9]. These NPC  
80 structures and most Nups are generally conserved among eukaryotes [1,2,10–13],  
81 although numerous species-dependent differences are found [14].

82 The Nup107-160 subcomplex is a key component of the outer rings and in most  
83 eukaryotes is composed of equal numbers of Nup107, Nup85, Nup96, Nup160, Nup133,  
84 Sec13, and Seh1, and depending on the species Nup37, Nup43, and ELYS are also  
85 included [15–20]. These Nups assemble to form, both *in vitro* and *in vivo*, the Y-shaped  
86 Nup107-160 subcomplex in *Homo sapiens*, the budding yeast *Saccharomyces cerevisiae*,  
87 and the thermophile *Chaetomium thermophilum* [5,20–25]. Nup85, Nup43, and Seh1  
88 form one of the two short arms, while Nup160, Nup37, and ELYS form the other. The  
89 two arms are connected to Nup96 and Sec13, and Nup96 is connected to Nup107 and  
90 Nup133 to form the long stem (Nup96-Nup107-Nup133) of the Y-shaped molecule.  
91 Multiple copies of the Nup107-160 subcomplex form the outer rings on the

92 nucleoplasmic and cytoplasmic sides of the NPC [4,5,26].

93 Like other eukaryotes, the fission yeast *Schizosaccharomyces pombe* has a set of  
94 conserved Nups [27–29] (hereafter, we use ‘sp’ to denote *S. pombe* proteins and ‘sc’ and  
95 ‘hs’ to indicate *S. cerevisiae* and *H. sapiens* proteins) (**S1 Table**). However, the *S. pombe*  
96 NPC has several unique features. It contains spEly5 (a potential homolog of metazoan  
97 ELYS) and spNup37, but lacks Sec13 and Nup43 [29], and it has two redundant  
98 Nup133 homologs (spNup131 and spNup132) in addition to two redundant  
99 scNic96/hsNup93 homologs (spNpp106 and spNup97). Most strikingly, the  
100 Nup107-160 subcomplex in *S. pombe* is composed of unequal numbers of spNup107,  
101 spNup120 (a homolog of hsNup160), spNup85, spNup96, spNup37, spEly5, spSeh1,  
102 spNup131 and spNup132 [29]; the relative numbers of spNup107 and spNup131 are 4 -  
103 8 in a single NPC, and that of spNup132 is approximately 48 whereas the other  
104 components are approximately 16. Thus, a unique/different structural organization of the  
105 Nup107-160 subcomplex is suggested in *S. pombe* compared with *S. cerevisiae* and  
106 humans [29].

107 spNup131 (spNup133a) and spNup132 (spNup133b) have similar molecular  
108 structure and both are able to bind to spNup107 [27]. Despite their similar biochemical  
109 features, spNup131 and spNup132 are likely to have different functions because gene  
110 disruption strains show different phenotypes. The strain lacking spNup132 (*nup132Δ*)  
111 displays altered NPC distribution [27]; its growth is inhibited in the presence of  
112 thiabendazole (a microtubule-depolymerizing drug) or hydroxyurea (a DNA replication  
113 inhibitor) [28,29]; and it exhibits delayed chromosome segregation in meiosis and  
114 unusual spore formation [29,30]. The strain lacking spNup131 (*nup131Δ*) doesn't  
115 display any of these characteristics. In addition, telomere elongation and deficiency in

116 SUMOylation have been reported in *nup132* $\Delta$ -specific phenotypes [31,32]. The causes  
117 of these functional differences remain unknown.

118 In the present study, we examined the positioning of each Nup within the NPC in *S.*  
119 *pombe* using immunoelectron microscopy and high-precision distance measurements  
120 using fluorescence microscopy and found asymmetrical positionings of the outer ring  
121 complex components in the nuclear and cytoplasmic sides of the NPC. In addition,  
122 genetical alteration of positioning of the key molecule Nup132 of the outer ring  
123 subcomplex resulted in the defects observed in *nup132* $\Delta$ .

124

## 125 **Results**

### 126 **spNup131 and spNup132 are differently positioned at the cytoplasmic and** 127 **nucleoplasmic sides of the NPC**

128 The molecular architectures of spNup131 and spNup132 are similar to that found in  
129 other species, with an N-terminal  $\beta$ -propeller domain followed by a C-terminal  $\alpha$ -helix  
130 stack domain [33] (**S1A Fig**). However, phylogenetic analysis indicates that spNup131  
131 and spNup132 belong to evolutionarily distant clades, with the spNup131-containing  
132 clade branching from a common ancestor of yeast Nup133 homologs much earlier than  
133 that of spNup132 (**S1B Fig**). This suggests that despite the similarity in their domain  
134 architecture, spNup131 and spNup132 may have structural features that are distinct  
135 enough to confer different functions.

136 To understand the differences between spNup131 and spNup132, we examined  
137 the positioning of those Nups within the NPC by immunoelectron microscopy (IEM).  
138 The spNup131 or spNup132 gene was replaced with the respective gene N-terminally  
139 fused to GFP (GFP-spNup131 or GFP-spNup132). IEM was carried out using a specific

140 antibody against GFP. The results showed that GFP-spNup131 is located at the  
141 cytoplasmic side of the NPC, while GFP-spNup132 is located at the nuclear side (**Fig**  
142 **1A**). To confirm the accessibility of the nucleus to immunogold particles using this  
143 method, the nuclear centromere protein spMis6 [34] was co-stained (**S2A-C Fig**); only  
144 the cells positive for spMis6 were evaluated for staining of spNup131(**S2B,C Fig**). A  
145 montage picture of spNup131 with quantification shows that spNup131 was exclusively  
146 located in the cytoplasmic side of the NPC (left panels of **Fig 1B**). In contrast, the  
147 localization of spNup132 was exclusively in the nuclear side (right panels of **Fig 1B**),  
148 indicating that spNup131 and spNup132 have distinct localizations. To resolve potential  
149 artifacts of GFP-tagging at the N-terminus, we repeated these experiments using strains  
150 in which spNup131 and spNup132 were C-terminally fused to GFP. We obtained  
151 essentially the same results with N- and C-tagged proteins (**Fig 1C**), suggesting that  
152 spNup131 and spNup132 are differentially positioned at the cytoplasmic and nuclear  
153 sides, respectively, of the NPC.

154           To confirm the different localization of spNup131 and spNup132 in living cells  
155 by fluorescence microscopy (FM), we observed cells simultaneously expressing  
156 spNup131 and spNup132 fused with GFP and mCherry, respectively; we also tested  
157 cells expressing spNup131 and spNup132 fused with mCherry and GFP, respectively  
158 (**Fig 1D**). To determine their localizations within nuclear pores with high-precision, we  
159 applied an open-source program “Chromagnon” [35] (This software is available at  
160 <https://github.com/macronucleus/Chromagnon> [36]). After the chromatic correction, the  
161 average distance of spNup131 from spNup132 in each nucleus along its radial direction  
162 was measured (see Materials and Methods for details). As a result, the position of  
163 mCherry-spNup132 relative to GFP-spNup131 was  $-49.3 \pm 1.8$  nm (mean  $\pm$  SEM), and

164 the position of mCherry-spNup131 relative to GFP-spNup132 was  $32.7 \pm 1.4$  nm, both  
165 indicating that spNup131 was located at the exterior position (distant from the nuclear  
166 center) compared with the location of spNup132 within the NPC (**Fig 1E**). These results  
167 support the interpretation of the IEM observation that spNup131 and spNup132 are  
168 separately localized in the NPC: spNup131 is positioned at the cytoplasmic side and  
169 spNup132 is positioned at the nucleoplasmic side of the NPC.

170

### 171 **Different functions of spNup131 and spNup132 at the cytoplasmic and** 172 **nucleoplasmic sides of the NPC**

173 To determine the function of spNup131 and spNup132, we identified its interacting  
174 proteins using affinity capture/mass spectrometry (**S3A, B Fig**). Several non-Nup  
175 proteins that interact with spNup131 and spNup132 were identified (**S3C Fig**).

176         Among the candidate proteins specifically interacting with spNup131, we  
177 selected spFar8 (also known as spCsc3) and examined its functional relationship with  
178 spNup131. spFar8 is one of the components of the striatin-interacting phosphatase and  
179 kinase (STRIPAK) complex [37,38] that regulates the functions of the spindle pole body  
180 (SPB; the yeast microtubule-organizing center) during mitosis [39]. GFP-fused spFar8  
181 (spFar8-GFP) localized at the nuclear periphery during interphase, as previously  
182 reported [39] (see “wild type” in **Fig 2A**). IEM analysis revealed that spFar8-GFP  
183 localized at the cytoplasmic side of the nuclear pores (**Fig 2B**). This NPC localization of  
184 spFar8-GFP was greatly decreased in the *nup131Δ* cells (see “*nup131Δ*” in **Fig 2A**) but  
185 not in the *nup132Δ* cells (“*nup132Δ*” in **Fig 2A**). Previous studies have reported that in  
186 the *nup132Δ* background, NPCs cluster on the NE [27]. This NPC-clustering phenotype  
187 in the *S. pombe nup132Δ* cells is of low penetrance, when the cells are in exponential



188 growth. In our experiment, NPCs did not cluster in the *nup132* $\Delta$  cells because the cells  
189 were growing exponentially. Western blotting analysis of the cell strains tested above  
190 showed no marked changes in the amount of spFar8 protein (**Fig 2C**). The  
191 mislocalization of spFar8 in the *nup131* $\Delta$  cells occurred when spNup132 was  
192 ectopically expressed, whereas normal localization was restored when spNup131 was  
193 expressed (**Fig 2D, E**). Localization of another STRIPAK complex protein, spFar11, to  
194 the nuclear periphery was also decreased in *nup131* $\Delta$  cells (**S4 Fig**). These results  
195 suggest that spNup131 plays a role in retaining the STRIPAK complex at the  
196 cytoplasmic side of the NPC in interphase cells. The genetic interaction of STRIPAK  
197 proteins with spNup131 shown by this experiment is consistent with their localization at  
198 the cytoplasmic side of the NPC indicated by IEM.

199         Among the candidate spNup132 interacting proteins identified by affinity  
200 capture/mass spectrometry (**S3C Fig**), we examined the functional relationship of  
201 spNup211 with spNup132. spNup211 is an *S. pombe* homolog of human Tpr and *S.*  
202 *cerevisiae* Mlp1 and Mlp2 [40]; Tpr homologs are known to localize on the nuclear side  
203 of the NPC [41,42]. IEM analysis of spNup211, whose C-terminal was tagged with GFP  
204 (spNup211-GFP), showed that spNup211 localized at the nuclear side of the nuclear  
205 pores as expected (**Fig 3A**). To examine its localization in relationship to spNup132,  
206 spNup211-GFP was observed by FM in wild type, *nup131* $\Delta$ , and *nup132* $\Delta$  cells. In wild  
207 type and *nup131* $\Delta$  cells, spNup211-GFP was localized at the nuclear periphery (see  
208 “wild type” and “*nup131* $\Delta$ ” in **Fig 3B**). In contrast, in the *nup132* $\Delta$  cells,  
209 spNup211-GFP formed several bright foci at the nuclear periphery (“*nup132* $\Delta$ ” in **Fig**  
210 **3B**). We measured the maximum fluorescence intensity of spNup211-GFP in each  
211 nucleus in wild type, *nup131* $\Delta$ , and *nup132* $\Delta$  cells. The value was significantly higher in

212 the *nup132Δ* cells (**Fig 3C, left graph**); the value was decreased when spNup132 was  
213 expressed (**Fig 3C, left graph**). On the other hand, spCut11-mCherry, as a control, was  
214 uniformly distributed at the nuclear periphery with similar maximum fluorescence  
215 intensities in all strains (**Fig 3C, right graph**). This result suggests that spNup132, but  
216 not spNup131, is the NPC component that contributes to spNup211 localization;  
217 however, we cannot exclude the contribution of additional factors. This fact is consistent  
218 with their localizations at the nucleoplasmic side of the NPC, and the lack of interaction  
219 between spNup211 and spNup131 is also consistent with their different localizations  
220 within the NPC.

221

#### 222 **Immunoelectron microscopy of spNup107-160 subcomplex Nups**

223 Because the Nup133 homologs are integrated components of the Nup107-160  
224 subcomplex, we next examined the positioning of the other Nup107-160 subcomplex  
225 components in *S. pombe*: spNup107 (scNup84/hsNup107), spNup120  
226 (scNup120/hsNup160), spNup85 (scNup85/hsNup85), spNup96 (also known as  
227 spNup189C; scNup145C/hsNup96), spNup37 (hsNup37), spEly5 (hsELYS), and  
228 spSeh1 (scSeh1/hsSeh1) in cells expressing each of these Nups fused to GFP. A  
229 spNup98-spNup96 fusion protein is expressed as the *nup189<sup>+</sup>* gene product, and  
230 spNup96 is generated by cleavage with the autopeptidase activity in the C-terminus of  
231 spNup98 [43].

232 IEM results showed that of the 7 Nups, spNup120, spNup85, spNup96,  
233 spNup37, spEly5, and spSeh1 were predominantly located on the cytoplasmic side of  
234 the NPC, whereas spNup107 was located on the nuclear side of the NPC (**Fig 4A**). The  
235 localization of spNup107 on the nuclear side was also confirmed using an N-terminus

236 fusion protein (**Fig 4A**). Simultaneous detection of spMis6-GFP further confirmed the  
237 localization of spNup120, spNup85, spNup96, spNup37, spEly5 and spSeh1 on the  
238 cytoplasmic side of the NPC (**Fig 4A**). This result suggests that the Nup107-160  
239 subcomplex is split into two pieces in *S. pombe* and that these two pieces are differentially  
240 located on the cytoplasmic and nuclear sides of the NPC. This result contrasts with the  
241 structure of the Nup107-160 complex reported in *S. cerevisiae* and humans, in which all  
242 of the components are connected to form the Y-shape structure. Thus, this result  
243 suggests an unexpected separation of the Nup107-160 subcomplex at the junction of  
244 spNup96 and spNup107 in *S. pombe*.

245         To confirm the different localizations of the Nup107-160 subcomplex  
246 components by FM, we examined the localization of these components in living cells.  
247 We chose spNup85 and spNup107 as representatives of cytoplasmic and nucleoplasmic  
248 components identified by IEM. We first determined the position of spNup85-GFP  
249 within NPCs by comparing it with that of mCherry-spNup131 and mCherry-spNup132  
250 (**Fig 4B**). The position of mCherry-spNup131 relative to spNup85-GFP was  $11.4 \pm 1.9$   
251 nm (mean  $\pm$  SEM) and the position of mCherry-spNup132 relative to spNup85-GFP  
252 was  $-26.2 \pm 1.0$  nm (**Fig 4B**; the relative position of Nup85 to Nup131 and Nup132 is  
253 indicated in the right panel). This result supports cytoplasmic positioning of spNup85 as  
254 indicated by IEM. Second, we determined the position of spNup107-GFP within NPCs  
255 using a similar method. The position of mCherry-spNup131 relative to spNup107-GFP  
256 was  $34.0 \pm 2.1$  nm and the position of mCherry-spNup132 relative to spNup107-GFP  
257 was  $-4.4 \pm 1.0$  nm (**Fig 4C**; the relative position of Nup107 to Nup131 and Nup132 is  
258 indicated in the right panel). This result supports nuclear positioning of spNup107 as  
259 indicated by IEM.

260           Taken together, these results demonstrate that the Nup107-160 subcomplex  
261 components are differentially localized at the cytoplasmic and nucleoplasmic sides  
262 within the NPC in *S. pombe* (**Fig 4D**). Thus, we call hereafter the cytoplasmic  
263 components (spNup131, spNup120, spNup85, spNup96, spNup37, spEly5 and spSeh1)  
264 as the spNup120 subcomplex and the nucleoplasmic components (spNup132 and  
265 spNup107) as the spNup132 subcomplex.

266           Based on the localization analysis in this study and quantification of each Nup  
267 reported previously [29], we estimated the molecular weight of the cytoplasmic outer  
268 ring (composed of the spNup120 subcomplex) and nucleoplasmic outer ring (composed  
269 of the spNup132 subcomplex) as 7.4 MDa and 7.0 MDa, respectively: the cytoplasmic  
270 outer ring is estimated as 8-fold of a single unit (two each of spNup120, spNup85,  
271 spNup96, spEly5, and spNup37 and one each of spSeh1 and spNup131), and the  
272 nucleoplasmic outer ring is estimated as 8-fold of a single unit (six spNup132 and one  
273 spNup107). In this estimation, a single unit of both the cytoplasmic and nucleoplasmic  
274 outer rings consist of 7  $\alpha$ -solenoids and 6  $\beta$ -propellers as elements, suggesting that  
275 similar ring structures may be consequently built in both sides. The values are a bit  
276 larger than the molecular weight (4.65 MDa) of one outer ring in *S. cerevisiae*, which  
277 consists of 8-fold of a single unit containing 5  $\alpha$ -solenoids and 4  $\beta$ -propellers as  
278 elements [26].

279

280 **Enforced cytoplasmic localization of Nup107 by fusing to Nup96 results in**  
281 **reduction of Nup132 from the nuclear side, leading to defects in meiosis**

282 To address the significance of the separated localization of the Nup107-160 subcomplex,  
283 we generated an *S. pombe* strain with spNup96 (one of the cytoplasmic outer ring

284 Nup120 subcomplex components) artificially fused to spNup107 (one of the nuclear  
285 outer ring Nup132 subcomplex components) in a *nup107* $\Delta$  background  
286 (spNup96-spNup107-GFP). The strain was viable, and Western blot analysis confirmed  
287 expression of the fusion protein with the predicted molecular weight (**Fig 5A**). By IEM,  
288 the majority of the spNup96-spNup107-GFP fusion protein molecules were localized at  
289 the cytoplasmic side of the NPC (**Fig 5B**), showing a change in the location of  
290 spNup107 from the nuclear side to the cytoplasmic side. Under this condition,  
291 spNup132 was recruited to both the nuclear and cytoplasmic sides of the NPC (**Fig 5C**),  
292 suggesting that a significant fraction of the spNup132 molecules was recruited by  
293 spNup107. We assumed that the cytoplasmic recruitment of spNup132 molecules would  
294 result in a reduction of spNup132 at the nuclear side. It is known that the *nup132* $\Delta$  cells  
295 exhibit growth sensitivity to the microtubule-destabilizing drug, thiabendazole (TBZ)  
296 [28, 29], and also exhibit delayed meiotic division and abnormal spore formation [30];  
297 however, the *nup131* $\Delta$  cells did not exhibit these phenotypes [29] (S6 Fig). Thus, we  
298 examined whether the spNup96-spNup107-GFP strain showed those deficiencies. We  
299 found that this strain exhibited growth sensitivity to TBZ (**Fig 5D**), delayed meiotic  
300 division (**Fig 5E, F**), and abnormal spore formation (**Fig 5G**), similarly to the defects  
301 found in *nup132* $\Delta$  cells. This result suggests that these defects are caused by reduction  
302 in the number of spNup132 located at the nuclear outer ring of the NPC, and also  
303 suggests that concomitant localization of spNup107 and a part of Nup132 with the  
304 spNup120 subcomplex at the cytoplasmic side of the NPC caused defects in normal  
305 progression of mitosis and meiosis. Alternatively, these defects might be caused by the  
306 altered dynamics of spNup96 and spNup107 at the NPC. Thus, split structure and  
307 asymmetrical localization of the Nup107-160 subcomplex are necessary for the normal

308 progression of mitosis and meiosis in *S. pombe*.

309

310 **The N-terminal  $\beta$ -propeller region is required for differential localization of**  
311 **Nup133 homologs**

312 Finally, we determined which domains of spNup131 and spNup132 were responsible for  
313 their different localizations. In this experiment, we expressed full length spNup131 or  
314 spNup132, fragments of spNup131 or spNup132, or chimeric proteins of spNup131 and  
315 spNup132 (**Fig 6A**). To exclude the possibility that endogenous spNup131 or spNup132  
316 predominantly occupy preferred sites for spNup131 and spNup132 fragments or  
317 chimeric proteins, a *nup131 $\Delta$  nup132 $\Delta$*  double-deletion strain (lacking genes for both  
318 spNup131 and spNup132) was used. Protein expression was confirmed by Western blot  
319 analysis (**S7A Fig**). FM observation showed that GFP fused full-length spNup131  
320 (spNup131FL) and spNup132 (spNup132FL) were localized at the nuclear periphery  
321 (**Fig 6B**). The N-terminal domains of both Nup131 and Nup132 (spNup131N and  
322 spNup132N) were not localized at the nuclear periphery, while the C-terminal domain  
323 of both proteins (spNup131C and spNup132C) were localized at the nuclear periphery,  
324 consistent with a previous report [44]. Interestingly, IEM analysis showed that  
325 spNup131C localized to the nuclear side of the NPC (**Fig 6C**) in contrast with the  
326 localization of full length spNup131 on the cytoplasmic side (compare the upper two  
327 panels in **Fig 6C**; also see **Fig 1B**). These results suggest that the C-terminal domains of  
328 both spNup131 and spNup132 have the ability to localize on the nuclear side of the  
329 NPC, probably through binding to Nup107, and also suggest that the N-terminal  
330 domains of spNup131 and spNup132 are involved in determining their differential  
331 localizations. To test this idea, we examined the localization of the chimeric proteins

332 spNup131N+spNup132C and spNup132N+spNup131C: If the C-terminal domains were  
333 independent and functioning correctly, both chimeric proteins should be localized to the  
334 nuclear side of the NPC via interaction with Nup107, and if the N-terminal domains  
335 were independent and functioning correctly, the spNup131N+spNup132C protein  
336 should then be localized to the cytoplasmic side via Nup131N and the  
337 spNup132N+spNup131C protein should be retained on the nuclear side via Nup132N.  
338 The results showed that the spNup131N+spNup132C chimeric protein was  
339 predominantly diffused in the cytoplasm, with slight enrichment at the NE (**Fig 6B**) and  
340 that the other chimeric protein, spNup132N+spNup131C, also diffused to the cytoplasm  
341 but with no enrichment in the NE (**Fig 6B**). The relatively strong cytoplasmic staining  
342 of the chimeric proteins suggests that the N-terminal domains may function to prevent  
343 "abnormal" localization of spNup131 and spNup132. Overall, this result indicates that  
344 both N-terminal and C-terminal domains are required for the proper differential  
345 localization of spNup131 and spNup132. Consistent with this result, expression of these  
346 chimeric proteins failed to overcome the TBZ sensitivity in *nup132Δ* (**S7B Fig**), and to  
347 rescue the defects in meiosis in *nup132Δ* (**S7C Fig**).

348

### 349 **Immunoelectron microscopy of the other nucleoporins**

350 Because the Nup107-160 subcomplex seems to have a unique organization in *S. pombe*,  
351 we wished to understand the overall structure of the NPC. For this purpose, we  
352 performed IEM of other Nups to reveal their positionings within the NPC. GFP-fused  
353 Nups were used and IEM was carried out using a specific antibody against GFP, unless  
354 specified otherwise (**Fig 7**). We first examined inner ring Nups known as the Nup93  
355 subcomplex in vertebrates. spNup97 and spNpp106, redundant *S. pombe* homologs of

356 scNic96/hsNup93, were both similarly positioned near the center of the NPC (**Fig 7A**);  
357 the redundancy of scNic96/hsNup93 homologs is unique to the *Schizosaccharomyces*  
358 genus. spNup184 (scNup188/hsNup188) and spNup186 (scNup192/hsNup205) were  
359 also positioned near the center (**Fig 7A**). spNup40 (scNup53/scNup59/hsNup35) and  
360 spNup155 (scNup157/scNup170/hsNup155) were also located near the center of the  
361 NPC, but they showed a slightly broader range of localization (**Fig 7A**).

362         The channel Nups spNup44 (scNup57/hsNup54) and spNup45  
363 (scNup49/hsNup58) were positioned at the center of the pore (**Fig 7B**). spNup98  
364 (scNup145n/hsNup98) was detected at the center of the pore, when using an anti-Nup98  
365 antibody (clone 13C2) [45], which specifically recognizes GLFG repeats located at the  
366 N-terminal region of endogenous spNup98 (see “spNup98” in **Fig 7B**). On the other  
367 hand, spNup98 (scNup145n/hsNup98) that was fused with GFP at its C-terminus was  
368 detected on the cytoplasmic side of the nuclear pore, when using an anti-GFP antibody  
369 (see “spNup98-GFP” in **Fig 7B**). In *H. sapiens* and *S. cerevisiae*, the C-terminal region  
370 of the Nup98 homologs (hsNup98/scNup145n/scNup100/scNup116) interacts with  
371 Nup96 homologs (hsNup96/scNup145c) [46–49], and the C-terminal Nup98-APD  
372 (autoproteolytic and NPC-targeting domain) binds to Nup88 homologs  
373 (hsNup88/scNup82) and to Nup96 in a mutually exclusive manner [49]. Thus, the  
374 C-terminal region of spNup98 is located near the positions of spNup96 and spNup82,  
375 both of which are positioned at the cytoplasmic side of the NPC, while the N-terminal  
376 region is extended to the center of the pore. The *S. pombe* homolog of the conserved  
377 Nup Nsp1 (scNsp1/hsNup62) was localized frequently in the cytoplasmic side and  
378 infrequently in the nuclear side of the NPC (**Fig 7B**).

379         spNup82 (scNup82/hsNup88) and spNup146 (scNup159/hsNup214) were



380 detected at the cytoplasmic side (**Fig 7C**) as expected from their homologous  
381 counterparts. spAmo1(scNup42/hsNlp1) was also detected at the cytoplasmic side (**Fig**  
382 **7C**). The transmembrane Nups, spCut11 (scNdc1/hsNdc1), spPom152 (scPom152), and  
383 spPom34 (scPom34) were localized at the center of the pore and slightly biased toward  
384 the cytoplasm (**Fig 7D**). The conserved Nups, spNup60 (scNup60), spNup61  
385 (scNup2/hsNup50), and spNup124 (scNup1/hsNup153) (**Fig 7E**) as well as  
386 spNup211(scMlp1/scMlp2/hsTpr) (**Fig 3A**) were detected at the nuclear side as  
387 expected from their homologous counterparts. We added a recently identified Nup  
388 spAlm1 [50] to the group of nuclear Nups, according to its nucleoplasmic localization  
389 (**Fig 7E**).

390 We summarized the positionings of the *S. pombe* Nups within the NPC in **Fig 8**.  
391 Transmembrane Nups (spCut11, spPom152, and spPom34); inner ring Nups (spNup97,  
392 spNpp106, spNup184, spNup186, spNup40, and spNup155); cytoplasmic ring Nups  
393 (spNup82, spNup146, spAmo1, spNsp1); central channel Nups (spNsp1, spNup98,  
394 spNup44, and spNup45); and nuclear basket Nups (spNup124, spNup60, spNup61,  
395 spNup211, and spAlm1) are positioned similarly to the positions of their orthologs in *S.*  
396 *cerevisiae* and human [1,4,5,26,51]. Thus, these NPC substructures, which include a  
397 central channel structure that is required for nucleocytoplasmic transport, seem to be  
398 common to other eukaryotes. In contrast, the outer ring Nup107-160 subcomplex  
399 (spNup131, spNup120, spNup85, spNup96, spNup37, spEly5 and spSeh1, spNup107  
400 and spNup132) in *S. pombe* has a highly unusual asymmetrical organization: It splits  
401 into two pieces (spNup120 and spNup132 subcomplexes). The spNup120 subcomplex  
402 (spNup131, spNup120, spNup85, spNup96, spNup37, spEly5 and spSeh1) is located in  
403 the cytoplasmic side of the NPC while the spNup132 subcomplex (spNup107 and

404 spNup132) is located in the nuclear side of the NPC. This asymmetrical organization of  
405 the Nup107-160 subcomplex may be required for building and maintaining the  
406 structural organization of the central channel and other NPC elements common to other  
407 eukaryotes, and consequently, the Nup107-160 subcomplex would be required for  
408 normal cell cycle progression in *S. pombe*.

409

## 410 **Discussion**

411 IEM of *S. pombe* Nups suggest that the *S. pombe*-specific Nup107-160 subcomplex  
412 structure is uniquely split into two pieces that localize differentially to the cytoplasmic  
413 and nuclear sides of the NPC while preserving the conserved modular structures of the  
414 Nup107-160 subcomplexes of other eukaryotes. High-precision distance measurements  
415 using FM also support this result (**Fig 1D, E, and 4b**). The asymmetrical organization  
416 of the *S. pombe* Nup107-160 subcomplex contrasts with the localization of the  
417 Nup107-160 subcomplexes in *H. sapiens*, *S. cerevisiae* and *Trypanosoma brucei*, in  
418 which Nup107-160 complexes are found on both the cytoplasmic and nuclear sides of  
419 the NPC [1,5,13,26,52]. Our results suggest that the *S. pombe* NPC has a novel  
420 organization that has evolved in the *Schizosaccharomyces* genus, which commonly  
421 bears the Nup132 and Nup131 clades (**S1B Fig**).

422 In *H. sapiens* and *S. cerevisiae*, the Nups in the Nup107-160 subcomplex  
423 assemble to form Y-shaped structures [5,21,24,25,53]. A total of 32 Y-complexes form  
424 two concentric reticulated rings at both the nuclear and cytoplasmic sides of the human  
425 NPC [4,5]. This organization may be supported by the iso-stoichiometry of each Nup in  
426 the Nup107-160 subcomplex: the amounts of each Nup in the Nup107-160 subcomplex  
427 in human cells are nearly equal [54]. In contrast, in *S. pombe*, the amounts of each Nup

428 in the Nup107-160 subcomplex are not equal but highly divergent, ranging from 1 copy  
429 to 5-6 copies/unit [29]. In addition, the Sec13 homolog in *S. pombe* does not localize in  
430 the NPC, and Nup43 is not conserved in the genome [29]. The different stoichiometry  
431 and composition of the *S. pombe* Nup107-160 subcomplex components are likely due to  
432 the unique fission yeast-specific separated structure of the Nup107-160 subcomplex  
433 revealed in this study.

434           The mechanisms underlying the difference in the positioning of spNup131 and  
435 spNup132 at the NPC are still uncharacterized. Affinity capture/mass spectrometry  
436 showed that both spNup131 (cytoplasmic side) and spNup132 (nuclear side) bind to  
437 spNup107 (nuclear side) and spNup85 (cytoplasmic side). Considering that the  
438 molecular structural features of the spNup131 and spNup132 proteins are similar to  
439 each other, it is possible that both Nup131 and Nup132 interact with spNup107 and  
440 Nup85 *in vitro* in the whole cell extract, where there is no steric hindrance. In contrast,  
441 under *in vivo* conditions, the steric hindrance of these proteins can be a more important  
442 factor in determining their position in the NPC structure. In fact, neither  
443 spNup131N+spNup132C nor spNup132N+spNup131C was properly positioned in the  
444 NPC (Fig. 6B), supporting this notion. Although affinity capture/mass spectrometry  
445 showed the above-mentioned confusing results, this analysis also showed the interactor  
446 specific to each of spNup131 and spNup132. spNup146 (cytoplasmic side) appeared as  
447 a specific interactor to spNup131 (S3A Fig). On the other hand, spNup211 (nuclear  
448 side) appeared as a specific interactor to spNup132 (S3B Fig). These results suggest that  
449 spNup146 and spNup211 may be involved in the differential localization of spNup131  
450 and spNup132, respectively. In fact, enforced relocalization of spNup107 to the  
451 cytoplasm side by expressing the spNup96-spNup107 fusion protein translocated half

452 the fraction of spNup132 to the cytoplasmic side, while the other half remained in the  
453 nuclear side (Fig. 5C), suggesting that at least one more factor, other than spNup107, is  
454 involved in the positioning of spNup132. spNup211 can be such a factor that positions  
455 spNup132 in the nuclear side of the NPC.

456 Two Nup133 homologs spNup131 and spNup132 play different roles with  
457 different positions at the NPC. spNup132 is required for normal kinetochore formation  
458 during meiosis in *S. pombe* [30]. Deletion of the *nup132* gene but not the *nup131* gene  
459 causes untimely kinetochore assembly and activates spindle assembly checkpoint  
460 machinery during the first meiotic chromosome segregation [30]. The deletion of the  
461 *nup132* gene also increases the sensitivity to the microtubule-destabilizing drug  
462 thiabendazole, likely due to defects in the kinetochore structure in mitosis [29].  
463 Similarly, in mammalian cells, kinetochore-related functions have been reported for the  
464 Nup107-160 subcomplex. A fraction of the Nup107-160 subcomplex is found at the  
465 kinetochores and spindle poles during mitosis [16,17,55,56], and depletion of the  
466 Nup107-160 subcomplex from kinetochores results in altered kinetochore protein  
467 recruitment [57-59]. While the molecular mechanism of underlying  
468 spNup132-mediated regulation of kinetochore proteins remains unknown, considering  
469 the similarity in kinetochore-related functions, spNup132, but not spNup131, is likely to  
470 be a functional homolog of mammalian Nup133.

471 On the other hand, spNup131 plays a different role at the cytoplasmic side of  
472 the NPC. IEM analysis in this study revealed that spNup131 is localized only on the  
473 cytoplasmic side of the NPC, and a genetic analysis showed interaction between  
474 spNup131 and spFar8. spFar8, which was proven to be located at the cytoplasmic side  
475 of the NPC in this study, is an *S. pombe* ortholog of the STRIPAK complex component

476 Striatin [38]. In *S. pombe*, the STRIPAK complex regulates the septation initiation  
477 network through the conserved protein kinase Mob1 [37,60] and is required for  
478 asymmetric division of mother and daughter SPBs during mitosis [39]. The  
479 spNup131-dependent NPC localization of spFar8 revealed by this study implies that the  
480 NPC regulates STRIPAK localization in interphase cells. Human STRIPAK complexes  
481 have been proposed to play roles at the interface between the Golgi and the outer  
482 nuclear envelope [38]. Considering the physical and genetic interaction with spNup131,  
483 STRIPAK is likely to interact with the NPC on the cytoplasmic side of the NE.  
484 Although the role of the STRIPAK complex in interphase cells in *S. pombe* is not fully  
485 understood, the interaction between spNup131 and spFar8 may provide an important  
486 example linking the NPC to cytoplasmic structures.

487         This study demonstrates that the *S. pombe* Nup107-160 subcomplex has a  
488 novel separated structure and exhibits a localization pattern not reported in other  
489 organisms. Recent studies suggest that NPC structures are not necessarily the same  
490 among eukaryotes [26,61,62]. For example, the binucleated ciliate *Tetrahymena*  
491 *thermophila*, a single-cell organism, has two functionally distinct nuclei, the  
492 macronucleus (MAC) and micronucleus (MIC), in a single cell: The MAC and MIC  
493 differ in size, transcriptional activity, and nucleocytoplasmic transport specificity [63].  
494 Interestingly, in *T. thermophila*, the MAC and the MIC NPCs are composed of differ  
495 amounts of the Nup107-160 subcomplex components [61]. The amount of the  
496 subcomplex in the MIC is about three times more than that in the MAC, suggesting that  
497 the Nup107-160 subcomplex forms different structures in the MAC from the MIC. In  
498 the green algae *Chlamydomonas reinhardtii*, a single cell organism, the NPCs have 24  
499 Nup107-160 subcomplexes asymmetrically distributed within a single NPC: 16 at the

500 nuclear side forming double outer rings and 8 at the cytoplasmic side forming one outer  
501 ring [62]. The asymmetrical distribution of the Nup107-160 subcomplex in *C.*  
502 *reinhardtii* may suggest a specific function of the complex in either cytoplasmic or  
503 nuclear side of the NPC although it is currently unclear. In some multicellular organisms,  
504 the expression level of Nups varies between cell types and during development  
505 [54,64–67]. It is also known that some mutations in Nups result in developmental  
506 defects in metazoans [68]. These findings suggest that the NPC composition in cell  
507 types and during development is biologically significant. Altered compositions might  
508 alter the NPC structure, at least in part; thus, unidentified NPC subcomplex structures  
509 may play roles in specific biological events such as differentiation and development.  
510 Thus, we speculate that novel NPC structures may be important to elucidate the  
511 biological functions of the NPC.

512

## 513 **Materials and Methods**

### 514 ***S. pombe* cell cultivation**

515 Strains used in this study are listed in S2 Table. YES or EMM2 culture medium was  
516 used for routine cultures [69]. For fluorescence microscopy, cells were grown in EMM2  
517 liquid medium. ME medium was used to induce meiosis and spore formation. When  
518 necessary, TBZ (T5535-50G, Sigma-Aldrich Inc, Tokyo, Japan) was added to the YES  
519 medium to a final concentration of 20 µg/mL.

520

### 521 ***Immunoelectron microscopy***

522 For immunoelectron microscopy,  $1.5 \times 10^8$  cells expressing GFP-Nup131 were fixed in  
523 1 mL of a mixture of 4% formaldehyde (18814-10, Polysciences, Inc, Warrington, PA,

524 USA) and 0.01% glutaraldehyde (1909-10, Polysciences, Inc.) dissolved in 0.1 M  
525 phosphate buffer (PB) (pH 7.4) for 20 min at room temperature, treated with 0.5 mg/mL  
526 Zymolyase 100T (7665-55, Nacalai Tesque, Inc., Kyoto, Japan) in PB for 20-30 min at  
527 30°C, and then permeabilized with 0.2% saponin (30502-42, Nacalai Tesque, Inc.) and  
528 1% bovine serum albumin (BSA) in PB for 15 min. The GFP epitope tag was labeled  
529 with a primary antibody (600-401-215, rabbit polyclonal anti-GFP antibody, Rockland  
530 Immunochemicals, Limerick, PA, USA) diluted 1:400 in PB containing 1% BSA and  
531 0.01% saponin, and a secondary antibody (7304, goat anti-rabbit Alexa 594  
532 FluoroNanogold Fab' fragment; Nanoprobes Inc., Yaphank, NY, USA) diluted 1:400.  
533 The same immunostaining conditions were used for the cells expressing each of the  
534 other GFP-fused Nups except for the dilution ratios of primary and secondary  
535 antibodies; the conditions used for each experiment are listed in S3 Table. For analysis  
536 of the spNup98 N-terminal region, we used a mouse monoclonal anti-Nup98 antibody  
537 (13C2) [43,45] (available from BioAcademia Inc, Japan, Cat. #70-345) diluted 1:100  
538 and anti-mouse Alexa594 FluoroNanogold Fab' fragment (7302, Nanoprobes) diluted  
539 1:400. Cells then were fixed again with 1% glutaraldehyde in PB for 1 h at room  
540 temperature and treated with 100 mM lysine HCl in PB twice for 10 min each. The cells  
541 were stored at 4°C until use. Before use, the cells were incubated with 50 mM HEPES  
542 (pH 5.8) three times for 3 min each and with distilled water (DW) once, incubated with  
543 Silver enhancement reagent (a mixture of equal volumes of the following A, B, and C  
544 solutions: A, 0.2% silver acetate solution; B, 2.8% trisodium citrate-2H<sub>2</sub>O, 3% citric  
545 acid-H<sub>2</sub>O, and 0.5% hydroquinone; C, 300 mM HEPES, pH 8.2) at 25°C for 2-5 min.  
546 Cells were embedded in 2% low melting agarose dissolved in DW. Cells were  
547 post-fixed with 2% OsO<sub>4</sub> in DW for 15 min and stained with 1% uranyl acetate in DW

548 at room temperature. Cells were dehydrated using stepwise incubations in ethanol and  
549 acetone and finally embedded in epoxy resin Epon812. Solidified blocks containing  
550 cells were sectioned, and the ultra-thin sections were stained with uranyl acetate and  
551 lead citrate, the usual pretreatment for EM observations. Images were obtained using a  
552 JEM1400 transmission electron microscope (JEOL, Tokyo, Japan) at 120kV.

553 Nuclear pores containing more than two immunogold particles were chosen for  
554 localization analysis as described previously [1]. To confirm the accessibility of the  
555 nucleus to immunogold particles, the nuclear centromere protein spMis6-GFP was  
556 co-expressed with GFP-fused Nups in cells and stained with anti-GFP antibody for IEM.  
557 For quantification of the Nup signals, we chose only cell specimens with a positive  
558 spMis6-GFP signal. For quantitative representations, montage pictures were produced  
559 by stacking 20 NPC images with 5% opacity on Adobe Photoshop CS software.

560 We also quantified the distribution of GFP-fused proteins in the cytoplasmic,  
561 middle, and nucleoplasmic regions of the NPC by counting the number of gold particles  
562 in each region (**S8 Fig**).

563

#### 564 *cDNA clones*

565 *nup107<sup>+</sup>* and *nup37<sup>+</sup>* cDNAs were provided by National BioResource Project Japan  
566 (<http://yeast.lab.nig.ac.jp/yeast/top.xhtml>). cDNA fragments of other Nups were  
567 amplified from a cDNA library pTN-RC5 or pTN-FC9 (National BioResource Project  
568 Japan) using PCR.

569

#### 570 *Strain construction*

571 To visualize nuclear pore localization of the different domains of Nup131 and Nup132,



572 *lysI*<sup>+</sup>-integrating plasmids carrying GFPs65t-fused with respective Nup domains were  
573 introduced into cells with a *nup131Δnup132Δ* double-deletion mutant background. To  
574 construct the spNup96-spNup107 fusion Nup, a cDNA fragment encoding spNup107 or  
575 spNup107-GFP followed by a drug resistance marker gene was integrated after the  
576 chromosomal spNup96 coding region. After a diploid strain was obtained by crossing  
577 the spNup96-spNup107 fusion containing strain with the wild type strain, the *nup107*<sup>+</sup>  
578 gene on the original chromosomal locus was deleted. To introduce the chromosomal  
579 fluorescent tag and gene disruption, a two-step PCR method was applied [70]. Nup-GFP  
580 fusion constructs were described previously [29]. The spMis6-GFP fusion was  
581 constructed as described previously [71] or using the two-step PCR method.  
582 mCherry-spAtb2 was visualized as described previously [30].

583

#### 584 ***Plasmid construction***

585 To express the full-length or domains of the spNup131 and spNup132 proteins, cDNA  
586 fragments were amplified by PCR. For overexpression, the PCR products were  
587 sub-cloned into the plasmid that carries the *nmt1* promoter and terminator. For  
588 physiological expression, the PCR products were sub-cloned into the *Bgl*III site of the  
589 plasmid (pY53) that carries the *nup132* promoter (-1000bp)-driven GFPs65t and the  
590 *nmt1* terminator. Each sub-cloning was done by using the In-Fusion PCR cloning kit  
591 (Clontech Laboratories, Mountain View, CA, USA). Plasmids were integrated at the  
592 *lysI* gene locus. Correct integrations were confirmed by PCR.

593

#### 594 ***Fluorescence microscopy***

595 Images were obtained using a DeltaVision microscope system (GE Healthcare, Tokyo,

596 Japan) equipped with a CoolSNAP HQ<sup>2</sup> CCD camera (Photometrics, Tucson, AZ, USA)  
597 through an oil-immersion objective lens (PlanApoN60×OSC; NA, 1.4) (Olympus,  
598 Tokyo, Japan) as described previously [29]. Z-stack images were obtained and  
599 processed by deconvolution and denoising algorithm [72] when necessary. For time  
600 lapse microscopy, cells were observed every 5 minutes as described previously [30].  
601 The projection images of z-stacks were made by softWoRx software equipped in the  
602 microscope system.

603

#### 604 ***Precise distance measurements with fluorescence microscopy***

605 Cells to be analyzed were cultured in 150  $\mu$ l of the EMM2 5S medium on an 8-well  
606 chambered coverglass, Lab-Tek II (Thermo Fisher Scientific Japan, Yokohama, Japan);  
607 cells used for references for chromatic correction were also cultured in a chamber of the  
608 same coverglass. Simultaneously acquired multicolor images were obtained with OMX  
609 SR (GE Healthcare) equipped with three sCMOS cameras. The three-dimensional (3D)  
610 images were deconvolved by constrained iterative deconvolution using the Priism suite  
611 (<http://msg.ucsf.edu/IVE/>) with a Wiener filter enhancement of 0.9 and 15 iterations. To  
612 correct for chromatic shifts of multicolor FM images, green-to-red photoconversion of  
613 GFP was used as the reference as previously reported [73,74]: Nup96-GFP was used in  
614 this study. For photoconversion, cells were illuminated with 405 nm light at about 393  
615  $W/cm^2$  for 4 seconds, then both green and red-converted GFP species were excited with  
616 488 nm to obtain images of the same object in the green and red channels. Chromatic  
617 shifts were measured using such images, and the correction parameters were determined  
618 using the Chromagnon software (<https://github.com/macronucleus/Chromagnon>), by  
619 which a chromatic shift can be corrected with an accuracy of  $\sim 10$  nm in 2D XY plane

620 and ~15 nm in 3D XYZ space using test samples [35]. The correction parameters were  
621 applied to all images obtained from the same chambered coverglass as described in [35].

622           Next, individual nuclei in the images were identified and segmented by our  
623 software using functions from the “ndimage” module of the Scipy package  
624 (<http://www.scipy.org>). The centers of the nuclei were identified by least-square fitting  
625 with 3D ellipses using the 3D coordinates of the nucleoporin fluorescence above  
626 threshold. The images of the NE at the midsection were linearized with polar  
627 transformation. These images were then averaged across all angles to produce 1D  
628 intensity profiles along the radial direction of the nuclei. The intensity profiles were  
629 fitted to Gaussian profiles to determine a distance between the peaks of green and red  
630 for each of the individual nuclei. The mean distance was determined from more than 70  
631 nuclei. Because not all nuclei were round, we rejected nuclei of elliptical or irregular  
632 shapes before the final calculation.

633

#### 634 ***Western blot analysis***

635 For western blot analysis, whole cell extracts were prepared from approximately  $5 \times 10^6$   
636 cells by trichloroacetic acid (TCA) precipitation as described previously [29]. To detect  
637 GFP-fused proteins, a rabbit polyclonal anti-GFP antibody (600-401-215, Rockland  
638 Immunochemicals Inc.) was used. To detect spNup98, a mouse monoclonal anti-Nup98  
639 antibody (13C2) was used [45]. HRP-conjugated goat anti-rabbit or anti-mouse IgG  
640 (NA9340-1ml or NA9310-1ml, GE Healthcare) was used as a secondary antibody.  
641 Protein bands were detected by chemiluminescence using ChemiDoc MP imaging  
642 system (Bio-Rad).

643

644 ***Preparation of whole cell extracts for affinity-capture experiments***

645 Growing cells (about  $5 \times 10^9$ ) were collected and washed with 10 mM HEPES buffer  
646 (pH 7.5) containing 1 mM phenylmethylsulfonyl fluoride (PMSF). The washed cells  
647 were divided into aliquots of  $3 \times 10^8$  cells in 10 mM HEPES buffer (pH 7.5) containing  
648 1 mM PMSF. Cells were again collected by centrifugation, and the cell pellet was kept  
649 frozen by liquid nitrogen until use. To make a cell extract, the cell pellet was thawed  
650 and suspended in 100  $\mu$ L of lysis buffer (50 mM HEPES (pH 7.5), 150 mM NaCl, 1%  
651 Triton X-100, 1 mM EDTA, 2 mM PMSF) with a protease inhibitor cocktail (165-20281,  
652 Wako, Tokyo, Japan) and mashed by glass beads using Multi-beads shocker (Yasui  
653 Kikai Corporation, Osaka, Japan). We chose this extraction condition based on a  
654 previous study identifying the components of plant NPCs [11]. Because the presence of  
655 1% Triton X-100 gave better results for extracting plant NPC components, we decided  
656 to use 1% Triton X-100 as a detergent, and we examined three different salt conditions  
657 (50 mM, 150 mM or 500 mM NaCl) in the presence of the detergent. As a result, 150  
658 mM NaCl gave better results with low background. At least for extracting spNup131  
659 and spNup132, this condition was better than that optimized for extracting NPCs in  
660 other organisms such as budding yeast (1.5 M ammonium acetate, 1% Triton X-100)  
661 [75] and trypanosoma (20 mM HEPES (pH7.4), 250 mM NaCitrate, 0.5% Triton X-100,  
662 0.5% deoxy Big CHAP) [76]. After further addition of 400  $\mu$ L of lysis buffer, the  
663 mashed cell pellet was transferred to new microtubes. The supernatant was collected  
664 after centrifugation at 15000 rpm for 15 min at 4°C and used as the whole-cell extract.

665

666 ***Affinity-capture and LC/MS/MS analysis***

667 The whole-cell extract was incubated with a rabbit anti-GFP antibody (600-401-215,

668 Rockland Immunochemicals). Antibody-conjugated proteins were collected by  
669 incubating with Protein A Sepharose beads (17528001, GE Healthcare). Beads were  
670 then washed 4-5 times with the lysis buffer described above. After elution in  
671 SDS-PAGE sample buffer, protein samples were loaded onto a 12% SDS-PAGE gel for  
672 liquid chromatography coupled to tandem MS (LC/MS/MS). Data analysis for  
673 LC/MS/MS was performed as described previously [77] using the Pombase protein  
674 dataset released on November 12<sup>th</sup>, 2015. To identify proteins interacting with  
675 spNup131 and spNup132, protein samples were prepared from two independent  
676 experiments and each preparation was analyzed by LC/MS/MS. Proteins detected as  
677 more than one unique spectrum were identified as interacting proteins with spNup131  
678 and spNup132. Alternatively, when proteins detected as only one unique spectrum in the  
679 first experiment were repeatedly detected in the second experiment, they were also  
680 identified as interacting proteins.

681

## 682 **Acknowledgments**

683 We thank Naomi Takagi for technical assistance for mass spectrometry analysis and the  
684 National BioResource Project Japan for the Nup cDNA clones. We also thank Drs.  
685 Thomas U. Schwartz, Valérie Doye, and David B Alexander for critical reading of this  
686 paper.

687

## 688 **Competing financial interests**

689 The authors declare no competing financial interests.

690

## 691 **Supporting information**

692 **S1 Fig.** Phylogenetic analysis of Nup133 proteins

693 **S2 Fig.** IEM images of spMis6-GFP, GFP-spNup131, and GFP-spNup132

694 **S3 Fig.** Affinity capture/mass spectrometry of GFP-spNup131 and GFP-spNup132

695 **S4 Fig.** FM images of spFar11-GFP in wild type, *nup131* $\Delta$ , and *nup132* $\Delta$  cells

696 **S5 Fig.** Projections of raw IEM images

697 **S6 Fig.** Duration of meiosis I and II in *nup131* $\Delta$  cells

698 **S7 Fig.** Characterization of the strains used in Fig. 6

699 **S8 Fig.** Distribution of Nups within the NPC

700 **S1 Table.** Nucleoporins in *S. pombe*, *S. cerevisiae*, and *H. sapiens*

701 **S2 Table.** *S. pombe* strains used in this study

702 **S3 Table.** Dilution ratios of primary and secondary antibodies used for IEM

703 **S1 Dataset.** Individual IEM images of 20 NPCs used for superimposed images of Fig

704 1C (spNup131-GFP and spNup132-GFP)

705 **S2 Dataset.** Values of the distance between mCherry-spNup132 and GFP-spNup131

706 and those between mCherry-spNup131 and GFP-spNup132 measured for Fig 1E

707 **S3 Dataset.** Individual IEM images of 20 NPCs used for superimposed images of Fig

708 2B (spFar8-GFP)

709 **S4 Dataset.** Individual IEM images of 20 NPCs and the projection image analyzed for

710 Fig 3A (spNup211-GFP)

711 **S5 Dataset.** Values of the maximum fluorescence intensity of spNup211-GFP in wild

712 type, *nup131* $\Delta$  and *nup132* $\Delta$  cells measured for Fig 3C

713 **S6 Dataset.** Individual IEM images of 20 NPCs and their projection images analyzed

714 for Fig 4A (pNup120-GFP, spNup85-GFP, spNup96-GFP, spNup37-GFP, spEly5-GFP,

715 spSeh1-GFP, spNup107-GFP and GFP-spNup107)

716 **S7 Dataset.** Values of the distance between spNup85-GFP and mCherry-spNup131 and  
717 those between spNup85-GFP and mCherry-spNup132 measured for Fig 4B

718 **S8 Dataset.** Values of the distance between spNup107-GFP and mCherry-spNup131  
719 and those between spNup107-GFP and mCherry-spNup132 measured for Fig 4C

720 **S9 Dataset.** Individual IEM images of 20 NPCs and their projection images analyzed  
721 for Fig 5B (spNup96-spNup107-GFP) and 5C (GFP-spNup132 in the presence of the  
722 spNup96-spNup107 fusion protein)

723 **S10 Dataset.** Individual IEM images of 20 NPCs and their projection images analyzed  
724 for Fig 6C (full length GFP-spNup131 and GFP-spNup132, and their C-terminal  
725 domains in the *nup131Δnup132Δ* mutant cells)

726 **S11 Dataset.** Individual IEM images of 20 NPCs and their projection images analyzed  
727 for Fig 7 (inner ring Nups, channel Nups, cytoplasmic ring Nups, transmembrane Nups  
728 and nuclear basket Nups)

729

730 **References**

- 731 [1] Rout MP, Aitchison JD, Suprapto A, Hjertaas K, Zhao Y, Chait BT. The yeast  
732 nuclear pore complex: composition, architecture, and transport mechanism. *J Cell*  
733 *Biol.* 2000; 148: 635-651. doi:10.1083/jcb.148.4.635.
- 734 [2] Cronshaw JM, Krutchinsky AN, Zhang W, Chait BT, Matunis MJ. Proteomic  
735 analysis of the mammalian nuclear pore complex. *J Cell Biol.* 2002; 158: 915-927.  
736 doi:10.1083/jcb.200206106.
- 737 [3] Alber F, Dokudovskaya S, Veenhoff LM, Zhang W, Kipper J, Devos D, et al. The  
738 molecular architecture of the nuclear pore complex. *Nature.* 2007; 450: 695-701.  
739 doi:10.1038/nature06405.
- 740 [4] Bui KH, von Appen A, DiGuilio AL, Ori A, Sparks L, Mackmull MT, et al.  
741 Integrated structural analysis of the human nuclear pore complex scaffold. *Cell.*  
742 2013; 155: 1233-1243. doi:10.1016/j.cell.2013.10.055.
- 743 [5] von Appen A, Kosinski J, Sparks L, Ori A, DiGuilio AL, Vollmer B, et al. *In situ*  
744 structural analysis of the human nuclear pore complex. *Nature.* 2015; 526:  
745 140-143. doi:10.1038/nature15381.
- 746 [6] Kosinski J, Mosalaganti S, von Appen A, Teimer R, DiGuilio AL, Wan W, et al.  
747 Molecular architecture of the inner ring scaffold of the human nuclear pore  
748 complex. *Science.* 2016; 352: 363-365. doi: 10.1126/science.aaf0643.
- 749 [7] Lin DH, Stuwe T, Schilbach S, Rundlet EJ, Perriches T, Mobbs G, et al.  
750 Architecture of the symmetric core of the nuclear pore. *Science.* 2016; 352:  
751 aaf1015. doi:10.1126/science.aaf1015.
- 752 [8] Onischenko E, Stanton LH, Madrid AS, Kieselbach T, Weis K. Role of the Ndc1  
753 interaction network in yeast nuclear pore complex assembly and maintenance. *J*



- 754 Cell Biol. 2009; 185:475-491. doi: 10.1083/jcb.200810030.
- 755 [9] Eisenhardt N, Redolfi J, Antonin W. Interaction of Nup53 with Ndc1 and Nup155  
756 is required for nuclear pore complex assembly. J Cell Sci. 2014; 127: 908-921.  
757 doi: 10.1242/jcs.141739.
- 758 [10] DeGrasse JA, DuBois KN, Devos D, Siegel TN, Sali A, Field MC, et al. Evidence  
759 for a shared nuclear pore complex architecture that is conserved from the last  
760 common eukaryotic ancestor. Mol Cell Proteomics. 2009; 8: 2119-2130. doi:  
761 10.1074/mcp.M900038-MCP200.
- 762 [11] Tamura K, Fukao Y, Iwamoto M, Haraguchi T, Hara-Nishimura I. Identification  
763 and characterization of nuclear pore complex components in *Arabidopsis thaliana*.  
764 Plant Cell. 2010; 22: 4084-4097. doi: 10.1105/tpc.110.079947.
- 765 [12] Amlacher S, Sarges P, Flemming D, van Noort V, Kunze R, Devos DP, et al.  
766 Insight into structure and assembly of the nuclear pore complex by utilizing the  
767 genome of a eukaryotic thermophile. Cell. 2011; 146: 277-286. doi:  
768 10.1016/j.cell.2011.06.039.
- 769 [13] Obado SO, Brillantes M, Uryu K, Zhang W, Ketaren NE, Chait BT, et al.  
770 Interactome mapping reveals the evolutionary history of the nuclear pore complex.  
771 PLoS Biol. 2016; 14: e1002365. doi: 10.1371/journal.pbio.1002365.
- 772 [14] Knockenhauer KE, Schwartz TU. The nuclear pore complex as a flexible and  
773 dynamic gate. Cell. 2016; 164: 1162-1171. doi: 10.1016/j.cell.2016.01.034.
- 774 [15] Walther TC, Alves A, Pickersgill H, Loiodice I, Hetzer M, Galy V, et al. The  
775 conserved Nup107-160 complex is critical for nuclear pore complex assembly.  
776 Cell. 2003; 113: 195-206. doi: 10.1016/S0092-8674(03)00235-6.
- 777 [16] Harel A, Orjalo AV, Vincent T, Lachish-Zalait A, Vasu S, Shah S, et al. Removal

- 778 of a single pore subcomplex results in vertebrate nuclei devoid of nuclear pores.  
779 Mol Cell. 2003; 11: 853-864. doi: 10.1016/S1097-2765(03)00116-3.
- 780 [17] Loiodice I, Alves A, Rabut G, Van Overbeek M, Ellenberg J, Sibarita JB, et al.  
781 The entire Nup107-160 complex, including three new members, is targeted as one  
782 entity to kinetochores in mitosis. Mol Biol Cell. 2004; 15: 3333-3344. doi:  
783 10.1091/mbc.E03-12-0878.
- 784 [18] Rasala BA, Orjalo AV, Shen Z, Briggs S, Forbes DJ. ELYS is a dual  
785 nucleoporin/kinetochore protein required for nuclear pore assembly and proper  
786 cell division. Proc Natl Acad Sci U S A. 2006; 103: 17801-17806. doi:  
787 10.1073/pnas.0608484103.
- 788 [19] Liu HL, De Souza CP, Osmani AH, Osmani SA. The three fungal transmembrane  
789 nuclear pore complex proteins of *Aspergillus nidulans* are dispensable in the  
790 presence of an intact An-Nup84-120 complex. Mol. Biol. Cell. 2009; 20: 616-630.  
791 doi: 10.1091/mbc.E08-06-0628.
- 792 [20] Thierbach K, von Appen A, Thoms M, Beck M, Flemming D, Hurt E. Protein  
793 interfaces of the conserved Nup84 complex from *Chaetomium thermophilum*  
794 shown by crosslinking mass spectrometry and electron microscopy. Structure.  
795 2013; 21: 1672-1682. doi: 10.1016/j.str.2013.07.004.
- 796 [21] Kampmann M, Blobel G. Three-dimensional structure and flexibility of a  
797 membrane-coating module of the nuclear pore complex. Nat Struct Mol Biol.  
798 2009; 16: 782-788. doi: 10.1038/nsmb.1618.
- 799 [22] Flemming D, Thierbach K, Stelter P, Böttcher B, Hurt E. Precise mapping of  
800 subunits in multiprotein complexes by a versatile electron microscopy label. Nat  
801 Struct Mol Biol. 2010; 17: 775-778. doi:10.1038/nsmb.1811.

- 802 [23] Fernandez-Martinez J, Phillips J, Sekedat MD, Diaz-Avalos R, Velazquez-Muriel  
803 J, Franke JD, et al. Structure-function mapping of a heptameric module in the  
804 nuclear pore complex. *J. Cell Biol.* 2012; 196: 419-434. doi:  
805 10.1083/jcb.201109008.
- 806 [24] Kelley K, Knockenhauer KE, Kabachinski G, Schwartz TU. Atomic structure of  
807 the Y complex of the nuclear pore. *Nat Struct Mol Biol.* 2015; 22: 425-431. doi:  
808 10.1038/nsmb.2998.
- 809 [25] Stuwe T, Correia AR, Lin DH, Paduch M, Lu VT, Kossiakoff AA, et al. Nuclear  
810 pores. Architecture of the nuclear pore complex coat. *Science.* 2015; 347:  
811 1148-1152. doi: 10.1126/science.aaa4136.
- 812 [26] Kim SJ, Fernandez-Martinez J, Nudelman I, Shi Y, Zhang W, Raveh B, et al.  
813 Integrative structure and functional anatomy of a nuclear pore complex. *Nature.*  
814 2018; 555: 475-482. doi: 10.1038/nature26003.
- 815 [27] Bai SW, Rouquette J, Umeda M, Faigle W, Loew D, Sazer S, et al. The fission  
816 yeast Nup107-120 complex functionally interacts with the small GTPase Ran/Spi1  
817 and is required for mRNA export, nuclear pore distribution, and proper cell  
818 division. *Mol Cell Biol.* 2004; 24: 6379-6392. doi:  
819 10.1128/MCB.24.14.6379-6392.2004
- 820 [28] Chen XQ, Du X, Liu J, Balasubramanian MK, Balasundaram D. Identification of  
821 genes encoding putative nucleoporins and transport factors in the fission yeast  
822 *Schizosaccharomyces pombe*: a deletion analysis. *Yeast.* 2004; 21: 495-509. doi:  
823 10.1002/yea.1115.
- 824 [29] Asakawa H, Yang HJ, Yamamoto TG, Ohtsuki C, Chikashige Y, Sakata-Sogawa K,  
825 et al. Characterization of nuclear pore complex components in fission yeast

- 826 *Schizosaccharomyces pombe*. Nucleus. 2014; 5: 149-162. doi:  
827 10.4161/nucl.28487.
- 828 [30] Yang HJ, Asakawa H, Haraguchi T, Hiraoka Y. Nup132 modulates meiotic spindle  
829 attachment in fission yeast by regulating kinetochore assembly. J Cell Biol. 2015;  
830 211: 295-308. doi: 10.1083/jcb.201501035.
- 831 [31] Liu NN, Han TX, Du LL, Zhou JQ. A genome-wide screen for  
832 *Schizosaccharomyces pombe* deletion mutants that affect telomere length. Cell  
833 Res. 2010; 20: 963-965. doi: 10.1038/cr.2010.107.
- 834 [32] Nie M, Boddy MN. Pli1(PIAS1) SUMO ligase protected by the nuclear  
835 pore-associated SUMO protease Ulp1/SEN1/2. J Biol Chem. 2015; 290:  
836 22678-22685. doi: 10.1074/jbc.M115.673038.
- 837 [33] Whittle JR, Schwartz TU. Architectural nucleoporins Nup157/170 and Nup133  
838 are structurally related and descend from a second ancestral element. J Biol Chem.  
839 2009; 284: 28442-28452. doi: 10.1074/jbc.M109.023580.
- 840 [34] Saitoh S, Takahashi K, Yanagida M. Mis6, a fission yeast inner centromere protein,  
841 acts during G1/S and forms specialized chromatin required for equal segregation.  
842 Cell. 1997; 90: 131-143. doi: 10.1016/S0092-8674(00)80320-7.
- 843 [35] Matsuda A, Schermelleh L, Hirano Y, Haraguchi T, Hiraoka Y. Accurate and  
844 fiducial-marker-free correction for three-dimensional chromatic shift in biological  
845 fluorescence microscopy. Sci Rep. 2018; 8:7583. doi:  
846 10.1038/s41598-018-25922-7.
- 847 [36] Matsuda A. 2018. Chromagnon. Github.  
848 <https://github.com/macronucleus/chromagnon>. 84d4506.
- 849 [37] Goudreault M, D'Ambrosio LM, Kean MJ, Mullin MJ, Larsen BG, Sanchez A, et

- 850 al. A PP2A phosphatase high density interaction network identifies a novel  
851 striatin-interacting phosphatase and kinase complex linked to the cerebral  
852 cavernous malformation 3 (CCM3) protein. *Molecular & Cellular Proteomics*.  
853 2009; 8: 157-171. doi: 10.1074/mcp.M800266-MCP200.
- 854 [38] Frost A, Elgort MG, Brandman O, Ives C, Collins SR, Miller-Vedam L, et al.  
855 Functional repurposing revealed by comparing *S. pombe* and *S. cerevisiae* genetic  
856 interactions. *Cell*. 2012; 149: 1339-1352. doi: 10.1016/j.cell.2012.04.028.
- 857 [39] Singh NS, Shao N, McLean JR, Sevugan M, Ren L, Chew TG, et al.  
858 SIN-inhibitory phosphatase complex promotes Cdc11p dephosphorylation and  
859 propagates SIN asymmetry in fission yeast. *Curr Biol*. 2011; 21: 1968-1978. doi:  
860 10.1016/j.cub.2011.10.051.
- 861 [40] Bae JA, Moon D, Yoon JH. Nup211, the fission yeast homolog of Mlp1/Tpr, is  
862 involved in mRNA export. *J Microbiol*. 2009; 47:337-343. doi:  
863 10.1007/s12275-009-0125-7.
- 864 [41] Strambio-de-Castillia C, Blobel G, Rout MP. Proteins connecting the nuclear pore  
865 complex with the nuclear interior. *J Cell Biol*. 1999; 144: 839-855. doi:  
866 10.1083/jcb.144.5.839.
- 867 [42] Krull S, Thyberg J, Björkroth B, Rackwitz HR, Cordes VC. Nucleoporins as  
868 components of the nuclear pore complex core structure and Tpr as the  
869 architectural element of the nuclear basket. *Mol Biol Cell*. 2004; 15: 4261-4277.  
870 doi: 10.1091/mbc.e04-03-0165.
- 871 [43] Asakawa H, Mori C, Ohtsuki C, Iwamoto M, Hiraoka Y, Haraguchi T.  
872 Uncleavable Nup98-Nup96 is functional in the fission yeast *Schizosaccharomyces*  
873 *pombe*. *FEBS Open Bio*. 2015; 5: 508-514. doi: 10.1016/j.fob.2015.06.004.

- 874 [44] Berke IC, Boehmer T, Blobel G, Schwartz TU. Structural and functional analysis  
875 of Nup133 domains reveals modular building blocks of the nuclear pore complex.  
876 J Cell Biol. 2004; 167: 591-597. doi: 10.1083/jcb.200408109.
- 877 [45] Iwamoto M, Asakawa H, Ohtsuki C, Osakada H, Koujin T, Hiraoka Y, et al.  
878 Monoclonal antibodies recognize Gly-Leu-Phe-Gly repeat of nucleoporin Nup98  
879 of *Tetrahymena*, yeasts, and humans. Monoclon Antib Immunodiagn Immunother.  
880 2013; 32: 81-90. doi: 10.1089/mab.2012.0118.
- 881 [46] Hodel AE, Hodel MR, Griffis ER, Hennig KA, Ratner GA, Xu S, et al. The  
882 three-dimensional structure of the autoproteolytic, nuclear pore-targeting domain  
883 of the human nucleoporin Nup98. Mol Cell. 2002; 10: 347-358. doi:  
884 10.1016/S1097-2765(02)00589-0.
- 885 [47] Griffis ER, Xu S, Powers MA. Nup98 localizes to both nuclear and cytoplasmic  
886 sides of the nuclear pore and binds to two distinct nucleoporin subcomplexes. Mol  
887 Biol Cell. 2003; 14: 600-610. doi: 10.1091/mbc.E02-09-0582.
- 888 [48] Ratner GA, Hodel AE, Powers MA. Molecular determinants of binding between  
889 Gly-Leu-Phe-Gly nucleoporins and the nuclear pore complex. J Biol Chem. 2007;  
890 282: 33968-33976. doi: 10.1074/jbc.M707911200.
- 891 [49] Stuwe T, von Borzyskowski LS, Davenport AM, Hoelz A. Molecular basis for the  
892 anchoring of proto-oncoprotein Nup98 to the cytoplasmic face of the nuclear pore  
893 complex. J Mol Biol. 2012; 419: 330-346. doi: 10.1016/j.jmb.2012.03.024.
- 894 [50] Salas-Pino S, Gallardo P, Barrales RR, Braun S, Daga RR. The fission yeast  
895 nucleoporin Alm1 is required for proteasomal degradation of kinetochore  
896 components. J Cell Biol. 2017; 216:3591-3608. doi: 10.1083/jcb.201612194.
- 897 [51] Maimon T, Elad N, Dahan I, Medalia O. The human nuclear pore complex as

- 898 revealed by cryo-electron tomography. *Structure*. 2012; 20: 998-1006. doi:  
899 10.1016/j.str.2012.03.025.
- 900 [52] D'Angelo MA, Anderson DJ, Richard E, Hetzer MW. Nuclear pores form de novo  
901 from both sides of the nuclear envelope. *Science*. 2006; 312: 440-443. doi:  
902 10.1126/science.1124196.
- 903 [53] Lutzmann M, Kunze R, Buerer A, Aebi U, Hurt E. Modular self-assembly of a  
904 Y-shaped multiprotein complex from seven nucleoporins. *EMBO J*. 2002; 21:  
905 387-397. doi: 10.1093/emboj/21.3.387.
- 906 [54] Ori A, Banterle N, Iskar M, Andrés-Pons A, Escher C, Bui KH, et al. Cell  
907 type-specific nuclear pores: a case in point for context-dependent stoichiometry of  
908 molecular machines. *Mol Syst Biol*. 2013; 9: 648. doi: 10.1038/msb.2013.4.
- 909 [55] Belgareh N, Rabut G, Bai SW, van Overbeek M, Beaudouin J, Daigle N, et al. An  
910 evolutionarily conserved NPC subcomplex, which redistributes in part to  
911 kinetochores in mammalian cells. *J Cell Biol*. 2001; 154: 1147-1160. doi:  
912 10.1083/jcb.200101081.
- 913 [56] Orjalo AV, Arnaoutov A, Shen Z, Boyarchuk Y, Zeitlin SG, Fontoura B, et al. The  
914 Nup107-160 nucleoporin complex is required for correct bipolar spindle assembly.  
915 *Mol Biol Cell*. 2006; 17: 3806-3818. doi: 10.1091/mbc.E05-11-1061.
- 916 [57] Zuccolo M, Alves A, Galy V, Bolhy S, Formstecher E, Racine V, et al. The human  
917 Nup107-160 nuclear pore subcomplex contributes to proper kinetochore functions.  
918 *EMBO J*. 2007; 26: 1853-1864. doi: 10.1038/sj.emboj.7601642.
- 919 [58] Platani M, Santarella-Mellwig R, Posch M, Walczak R, Swedlow JR, Mattaj IW.  
920 The Nup107-160 nucleoporin complex promotes mitotic events via control of the  
921 localization state of the chromosome passenger complex. *Mol Biol Cell*. 2009; 20:

- 922 5260-5275. doi: 10.1091/mbc.E09-05-0377.
- 923 [59] Mishra RK, Chakraborty P, Arnaoutov A, Fontoura BM, Dasso M. The  
924 Nup107-160 complex and gamma-TuRC regulate microtubule polymerization at  
925 kinetochores. *Nat Cell Biol.* 2010; 12: 164-169. doi: 10.1038/ncb2016.
- 926 [60] Moreno CS, Lane WS, Pallas DC. A mammalian homolog of yeast MOB1 is both  
927 a member and a putative substrate of striatin family-protein phosphatase 2A  
928 complexes. *J. Biol. Chem.* 2001; 276: 24253–24260. doi:  
929 10.1074/jbc.M102398200.
- 930 [61] Iwamoto M, Osakada H, Mori C, Fukuda Y, Nagao K, Obuse C, et al.  
931 Compositionally distinct nuclear pore complexes of functionally distinct  
932 dimorphic nuclei in the ciliate *Tetrahymena*. *J Cell Sci.* 2017; 130: 1822-1834.  
933 doi: 10.1242/jcs.199398.
- 934 [62] Mosalaganti S, Kosinski J, Albert S, Schaffer M, Strenkert D, Salomé PA, et al. In  
935 situ architecture of the algal nuclear pore complex. *Nature Comm.* 2018; 9: 236.  
936 doi : 10.1038/s41467-018-04739-y.
- 937 [63] Karrer KM. Nuclear dualism. *Methods Cell Biol.* 2012; 109: 29-52. doi:  
938 10.1016/B978-0-12-385967-9.00003-7.
- 939 [64] Cho AR, Yang KJ, Bae Y, Bahk YY, Kim E, Lee H, et al. Tissue-specific  
940 expression and subcellular localization of ALADIN, the absence of which causes  
941 human triple A syndrome. *Exp. Mol. Med.* 2009; 41: 381–386. doi:  
942 10.3858/emm.2009.41.6.043.
- 943 [65] Olsson M, Schéele S, Ekblom P. Limited expression of nuclear pore membrane  
944 glycoprotein 210 in cell lines and tissues suggests cell-type specific nuclear pores  
945 in metazoans. *Exp Cell Res.* 2004; 292, 359-370. doi:



- 946           10.1016/j.yexcr.2003.09.014.
- 947 [66] D'Angelo MA, Raices M, Panowski SH, Hetzer MW. Age-dependent  
948           deterioration of nuclear pore complexes causes a loss of nuclear integrity in  
949           postmitotic cells. *Cell*. 2009; 136: 284-295. doi:10.1016/j.cell.2008.11.037.
- 950 [67] D'Angelo MA, Gomez-Cavazos JS, Mei A, Lackner DH, Hetzer MW. A change in  
951           nuclear pore complex composition regulates cell differentiation. *Dev Cell*. 2012;  
952           22: 446-458. doi: 10.1016/j.devcel.2011.11.021.
- 953 [68] Raices M, D'Angelo MA. Nuclear pore complex composition: a new regulator of  
954           tissue-specific and developmental functions. *Nat Rev Mol Cell Biol*. 2012; 13:  
955           687-699. doi: 10.1038/nrm3461.
- 956 [69] Moreno S, Klar A, Nurse P. Molecular genetic analysis of fission yeast  
957           *Schizosaccharomyces pombe*. *Methods Enzymol*. 1991; 194: 795-823. doi:  
958           10.1016/0076-6879(91)94059-L.
- 959 [70] Bähler J, Wu JQ, Longtine MS, Shah NG, McKenzie A 3rd, Steever AB, et al.  
960           Heterologous modules for efficient and versatile PCR-based gene targeting in  
961           *Schizosaccharomyces pombe*. *Yeast*. 1998; 14: 943-951. doi:  
962           10.1002/(SICI)1097-0061(199807)14:10<943::AID-YEA292>3.0.CO;2-Y.
- 963 [71] Chikashige Y, Kurokawa R, Haraguchi T, Hiraoka Y. Meiosis induced by  
964           inactivation of Pat1 kinase proceeds with aberrant nuclear positioning of  
965           centromeres in the fission yeast *Schizosaccharomyces pombe*. *Genes Cells*. 2004;  
966           9: 671-684. doi: 10.1111/j.1356-9597.2004.00760.x.
- 967 [72] Boulanger J, Kervrann C, Bouthemy P. A simulation and estimation framework  
968           for intracellular dynamics and trafficking in video-microscopy and fluorescence  
969           imagery. *Med. Image Anal*. 2009; 13: 132–142. doi: 10.1016/j.media.2008.06.017.

- 970 [73] Sawin KE, Nurse P. Photoactivation of green fluorescent protein. *Curr Biol.* 1997;  
971 7: R606-607. doi: 10.1016/S0960-9822(06)00313-7
- 972 [74] Matsuda A, Shao L, Boulanger J, Kervrann C, Carlton PM, Kner P, et al.  
973 Condensed mitotic chromosome structure at nanometer resolution using PALM  
974 and EGFP- histones. *PLoS ONE.* 2010; 5: e12768. doi:  
975 10.1371/journal.pone.0012768.
- 976 [75] Hakhverdyan Z, Domanski M, Hough LE, Oroskar AA, Oroskar AR, Keegan S, et  
977 al. Rapid, optimized interactomic screening. *Nat Methods.* 2015; 12: 553-560. doi:  
978 10.1038/nmeth.3395.
- 979 [76] Obado SO, Field MC, Chait BT, Rout MP. High-efficiency isolation of nuclear  
980 envelope protein complexes from Trypanosomes. *Methods Mol Biol.* 2016; 1411:  
981 67-80. doi: 10.1007/978-1-4939-3530-7\_3.
- 982 [77] Nozawa RS, Nagao K, Igami KT, Shibata S, Shirai N, Nozaki N, et al. Human  
983 inactive X chromosome is compacted through a polycomb-independent  
984 SMCHD1-HBiX1 pathway. *Nature Struct Mol Biol.* 2013; 20: 566–573. doi:  
985 10.1038/nsmb.2532.
- 986

987 **Figure legends**

988

989 **Fig 1. Localization of spNup131 and spNup132 at the NPC.**

990 **(A)** IEM of GFP-spNup131 and GFP-spNup132. Arrows indicate the nuclear pores.

991 Scale bar, 100 nm. **(B)** Quantitative representation of IEM for N-terminally tagged

992 spNup131 and spNup132. (left) A montage image of 20 immunoelectron micrographs.

993 The diameter of the circle is 200 nm. (right) A schematic drawing illustrating the

994 distribution of immunogold particles shown in the montage image. Red dots represent

995 the pore centers. **(C)** Quantitative representation of IEM for C-terminally tagged

996 spNup131 and spNup132. Montage pictures and distributions of immunogold particles

997 are shown as described in **(B)**. IEM micrographs used for the quantitative analysis are

998 available in S1 Dataset. **(D)** Fluorescence microscopy of a nucleus simultaneously

999 expressing spNup131 and spNup132 fused to GFP and mCherry in living cells. Single

1000 section images of the same focal plane are shown. (left) A nucleus expressing

1001 GFP-spNup131 and mCherry-spNup132. Green, GFP-spNup131; Magenta,

1002 mCherry-spNup132. (right) A nucleus expressing mCherry-spNup131 and

1003 GFP-spNup132. Magenta, mCherry-spNup132; Green, GFP-spNup131. Scale bar, 1  $\mu$ m.

1004 **(E)** Distances between spNup131 and spNup132 in living cells. Results from cells

1005 expressing GFP-spNup131 and mCherry-spNup132 (n=90, left) and results from cells

1006 expressing mCherry-spNup131 and GFP-spNup132 (n=138, right) are shown in the box

1007 plot: values of the distance determined in individual cells are shown in S2 Dataset.

1008 Center lines show the medians; box limits indicate the 25th and 75th percentiles.

1009 Whiskers extend to the 5th and 95th percentiles. The diagram on the right shows the

1010 positions of spNup131 and spNup132 within the NPC.

1011

1012 **Fig 2. spNup131 is required for spFar8 localization on the cytoplasmic side of the**  
1013 **NPC.**

1014 **(A)** Localization of spFar8-GFP in wild type, *nup131* $\Delta$ , and *nup132* $\Delta$  cells. spFar8-GFP  
1015 was expressed in the indicated strains, and cells exponentially growing in EMM2 liquid  
1016 medium were observed by FM. Single section images of the same focal plane are shown.  
1017 spCut11-mCherry was observed as an NPC marker. Scale bar, 10  $\mu$ m. **(B)** IEM of  
1018 spFar8-GFP. For quantitative representation, a montage image of 20 immunoelectron  
1019 micrographs and a schematic drawing illustrating the distribution of immunogold  
1020 particles are shown. The red point indicates the pore center. IEM micrographs used for  
1021 the quantitative analysis are available in S3 Dataset. **(C)** Western blot analysis of  
1022 spFar8-GFP. Whole cell extracts were prepared from wild type, *nup131* $\Delta$ , and *nup132* $\Delta$   
1023 cells expressing spFar8-GFP and subjected to SDS-PAGE and Western blot analysis.  
1024 spFar8-GFP was detected with anti-GFP antibody. spNup98 was detected with  
1025 anti-Nup98 antibody (13C2) as a loading control. The arrow indicates the position of  
1026 spFar8-GFP. Small dots on the left indicate positions of molecular weight markers. **(D)**  
1027 Overexpression of spNup131 and spNup132 in *nup131* $\Delta$  cells expressing spFar8-GFP.  
1028 spNup131 or spNup132 were overexpressed in *nup131* $\Delta$  cells and localization of  
1029 spFar8-GFP and spCut11-mCherry was observed by FM. Empty vector was also  
1030 introduced for a control strain. Single section images of the same focal plane are shown.  
1031 Scale bar, 10 $\mu$ m. **(E)** Quantitative analysis of cells exhibiting spFar8-GFP at the NE in  
1032 the experiment described in **(D)**. Cells observed were: 81, 102, and 130 for vector,  
1033 spNup131<sup>op</sup>, and spNup132<sup>op</sup>, respectively.

1034

1035 **Fig 3. spNup132 is required for the distribution of the nucleoplasmic nucleoporin**

1036 **spNup211 at the NPC.**

1037 (A) IEM of spNup211-GFP. For quantitative representation, a schematic drawing  
1038 illustrating the distribution of immunogold particles based on 20 immunoelectron  
1039 micrographs is shown. The red point indicates the pore center. Individual IEM  
1040 micrographs and the projection image are available in S4 Dataset. (B) FM of  
1041 spNup211-GFP in living cells growing exponentially. Single section images of the same  
1042 focal plane are shown. Arrows indicate bright dots observed in *nup132* $\Delta$  cells. Scale bar,  
1043 10  $\mu$ m. (C) Maximum intensity values of spNup211-GFP and spCut11-mCherry in wild  
1044 type (n=76), *nup131* $\Delta$  (n=50), *nup132* $\Delta$  (n=73), *nup132* $\Delta$  +vector (n=61) and *nup132* $\Delta$   
1045 +*nup132*<sup>+</sup> (n=46) cells: values of the maximum intensity determined in individual cells  
1046 are shown in S5 Dataset. In the box plot, the center lines show the medians; box limits  
1047 indicate the 25th and 75th percentiles. Whiskers extend to the 5th and 95th percentiles.  
1048 Averages ( $\pm$  standard deviations) are  $110.1 \pm 22.7$ ,  $105.0 \pm 21.5$ ,  $154.7 \pm 64.1$ ,  $153.2 \pm$   
1049  $56.5$  and  $121.9 \pm 23.9$  for spNup211-GFP, and  $18.0 \pm 3.2$ ,  $17.6 \pm 3.0$ ,  $18.8 \pm 4.0$ ,  $18.2 \pm$   
1050  $3.1$  and  $20.8 \pm 3.3$  for spCut11-mCherry in wild type, *nup131* $\Delta$ , *nup132* $\Delta$ ,  
1051 *nup132* $\Delta$ +vector and *nup132* $\Delta$ +*nup132*<sup>+</sup>, respectively. Asterisks represent the *p* value of  
1052 Mann-Whitney's U-test, when compared with wild type: \*\*,  $p < 0.01$ ; \*\*\*,  $p < 0.001$ . n.s.,  
1053 no significant difference ( $p > 0.05$ ).

1054

1055 **Fig 4. Localization of Nup107-160 subcomplex orthologs.**

1056 (A) IEM of *S. pombe* Nup107-160 subcomplex orthologs. Immunogold distributions of  
1057 the projected immunoelectron micrographs are shown as a quantitative representation.

1058 To confirm the accessibility of the nucleus to immunogold particles, spMis6-GFP was

1059 used. spMis6-positive nuclei were evaluated for staining with anti-GFP antibody.  
1060 Projections of raw IEM micrographs are shown in S5A Fig. Individual IEM  
1061 micrographs of 20 NPCs are available in S6 Dataset. **(B)** Position of spNup85-GFP  
1062 determined by high-precision distance measurements using FM. **(upper panel)** FM  
1063 images of a nucleus expressing spNup85-GFP and mCherry-spNup131 or  
1064 mCherry-spNup132. Green, spNup85-GFP; magenta, mCherry-spNup131 or  
1065 mCherry-spNup132. Single section images of the same focal plane are shown. Scale bar,  
1066 1  $\mu\text{m}$ . **(lower panel)** Distance between spNup85-GFP and mCherry-spNup131 (left) or  
1067 mCherry-spNup132 (right). The relative positions of spNup131 and spNup132 to  
1068 spNup85 are shown in the box plot: center lines show the medians; box limits indicate  
1069 the 25th and 75th percentiles; whiskers extend to the 5th and 95th percentiles. n, cell  
1070 number examined. Values of the distance determined in individual cells are shown in S7  
1071 Dataset. The diagram on the right shows the positions of spNup85, spNup131 and  
1072 spNup132 within the NPC. **(C)** Position of spNup107-GFP determined by  
1073 high-precision distance measurements using FM. **(upper panel)** FM images of a  
1074 nucleus expressing spNup107-GFP and mCherry-spNup131 or mCherry-spNup132.  
1075 Green, spNup107-GFP; magenta, mCherry-spNup131 or mCherry-spNup132. Single  
1076 section images of the same focal plane are shown. Scale bar, 1  $\mu\text{m}$ . **(lower panel)**  
1077 Distance between spNup107-GFP and mCherry-spNup131 (left) or mCherry-spNup132  
1078 (right). The relative positions of spNup131 and spNup132 to spNup107 are shown in the  
1079 box plot as described in **(B)**. Values of the distance determined in individual cells are  
1080 shown in S8 Dataset. The diagram on the right shows the positions of spNup107,  
1081 spNup131 and spNup132 within the NPC. **(D)** A schematic drawing showing the  
1082 localization of Nup107-160 subcomplex orthologs in *S. pombe*.

1083

1084 **Fig 5. Localization and functional analysis of an spNup96-spNup107 fusion Nup.**

1085 (A) Western blot analysis of the spNup96-spNup107-GFP fusion protein. Asterisks  
1086 represent non-specific cross reactions of the anti-GFP antibody. (B) IEM of the  
1087 spNup96-spNup107 fusion protein. Immunogold distribution of the projected  
1088 immunoelectron micrographs is shown. Projection of raw IEM images is shown in S5B  
1089 Fig. Individual IEM micrographs of 20 NPCs are available in S9 Dataset. (C) IEM of  
1090 GFP-spNup132 in wild type and spNup96-spNup107 fusion backgrounds. Localization  
1091 of GFP-spNup132 in a wild type background is taken from the data shown in **Fig 1B**.  
1092 Projection of raw IEM images is shown in S5B Fig. Individual IEM micrographs of 20  
1093 NPCs are available in S9 Dataset. (D) A cell growth assay in the presence (+TBZ) or  
1094 absence (-TBZ) of TBZ. Five-fold serial dilutions of wild type and spNup96-spNup107  
1095 fusion strains were spotted on YES medium containing or lacking TBZ and incubated  
1096 for 3 days. (E) Time-lapse observation of *S. pombe* cells (wt or spNup96-spNup107  
1097 fusion strains) undergoing meiosis. Cells expressing mCherry-fused  $\alpha$ -tubulin (spAtb2)  
1098 were induced to enter meiosis. The duration of meiosis I and II was determined as the  
1099 time the spindle was present. Dotted lines show cell shapes. The time 0 indicates the  
1100 time of the first appearance of meiosis I spindle formation. Representative images are  
1101 shown as a maximum intensity projection of the serial z-sections (number of cells  
1102 observed: 32 for wild type and 33 for spNup96-spNup107). (F) Statistical analysis for  
1103 images obtained in (E). Duration of meiosis I and II. Error bars represent standard  
1104 deviations. The duration of meiosis I was  $28.4 \pm 3.0$  min in wild type and  $37.9 \pm 6.3$   
1105 min in spNup96-spNup107 fusion cells. The duration of meiosis II was  $25.8 \pm 1.8$  min  
1106 in wild type and  $29.8 \pm 2.9$  min in spNup96-spNup107 fusion cells. Asterisks indicate

1107 statistical significance ( $p < 0.0001$ ) between the indicated strains by Welch's t-test.  
1108 Number of cells observed: 32 for wild type and 33 for spNup96-spNup107. **(G)**  
1109 Abnormal spore formation was observed in the spNup96-spNup107 fusion background.  
1110 More than 200 asci were counted for each strain.

1111

1112 **Fig 6. Localization of the spNup131 and spNup132 domains.**

1113 **(A)** Schematics of the spNup131 and spNup132 fragments. Magenta represents peptides  
1114 from spNup131 and light blue represents peptides from spNup132. **(B)** Localization of  
1115 spNup131 and spNup132 fragments as determined by FM. GFP-fused fragments were  
1116 expressed under the spNup132 promoter in the background of the *nup131Δ nup132Δ*  
1117 double mutant. Cells were grown on YES plate media for only one day. For this short  
1118 period of incubation, the NPC-clustering phenotype was not apparent. spCut11-mCherry  
1119 served as an NPC marker. Single section images of the same focal plane are shown.  
1120 Scale bar, 5  $\mu\text{m}$ . **(C)** IEM of the spNup131 and spNup132 fragments. Projection images  
1121 (left) and immunogold distributions (right) are shown as described in the legend of **Fig**  
1122 **1B**. The red points indicate the pore centers. IEM micrographs used for the quantitative  
1123 analysis are available in S10 Dataset.

1124

1125 **Fig 7. IEM of *S. pombe* nucleoporins.**

1126 **(A)** Inner ring Nups. **(B)** Channel Nups. IEM for spNup98 was performed using an  
1127 anti-Nup98 antibody (13C2) for the wild type strain and an anti-GFP antibody for the  
1128 spNup98-GFP strain. **(C)** Cytoplasmic ring Nups. **(D)** Transmembrane Nups. **(E)**  
1129 Nuclear basket Nups. The localization of the other nuclear basket Nup, spNup211, is  
1130 shown in **Fig 3A**. Immunogold distributions are shown based on the projected



1131 immunoelectron micrographs for quantitative representation. The red points indicate the  
1132 pore centers. Projections of raw IEM images are shown in S5C-G Fig. Individual IEM  
1133 micrographs of 20 NPCs are available in S11 Dataset.

1134

1135 **Fig 8. Model of the *S. pombe* NPC.**

1136 **(A)** Positions of the *S. pombe* Nups. The numbers of the Nup107-160 subcomplex  
1137 components were deduced based on the FM and biochemical analysis reported  
1138 previously [29]: spNup131 (1 molecule, dark blue), the  
1139 spNup120-spNup85-spNup96-spNup37-spEly5 complex (2 molecules each, dark green),  
1140 spSeh1 (1 molecule, light green), spNup107 (1 molecule, orange), spNup132 (6  
1141 molecules, right blue). **(B)** Schematic drawings of the NPC structure in *H. sapiens* (left)  
1142 [5] and *S. cerevisiae* (middle) [26] in comparison to that in *S. pombe* (right).

1143

## Asakawa et al. Fig 1

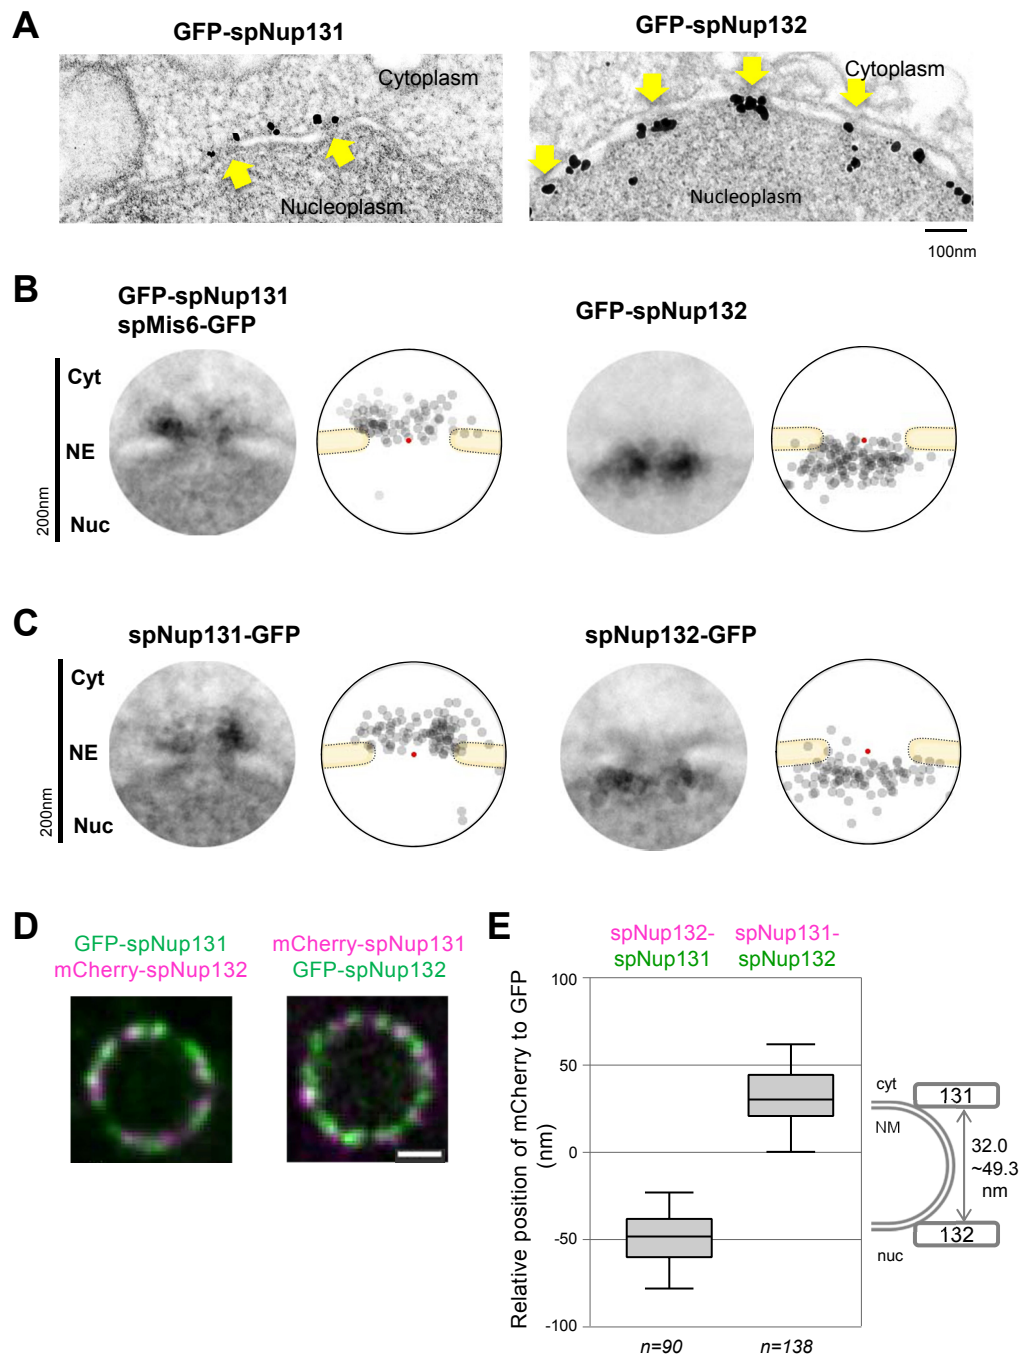

## Asakawa et al. Fig 2

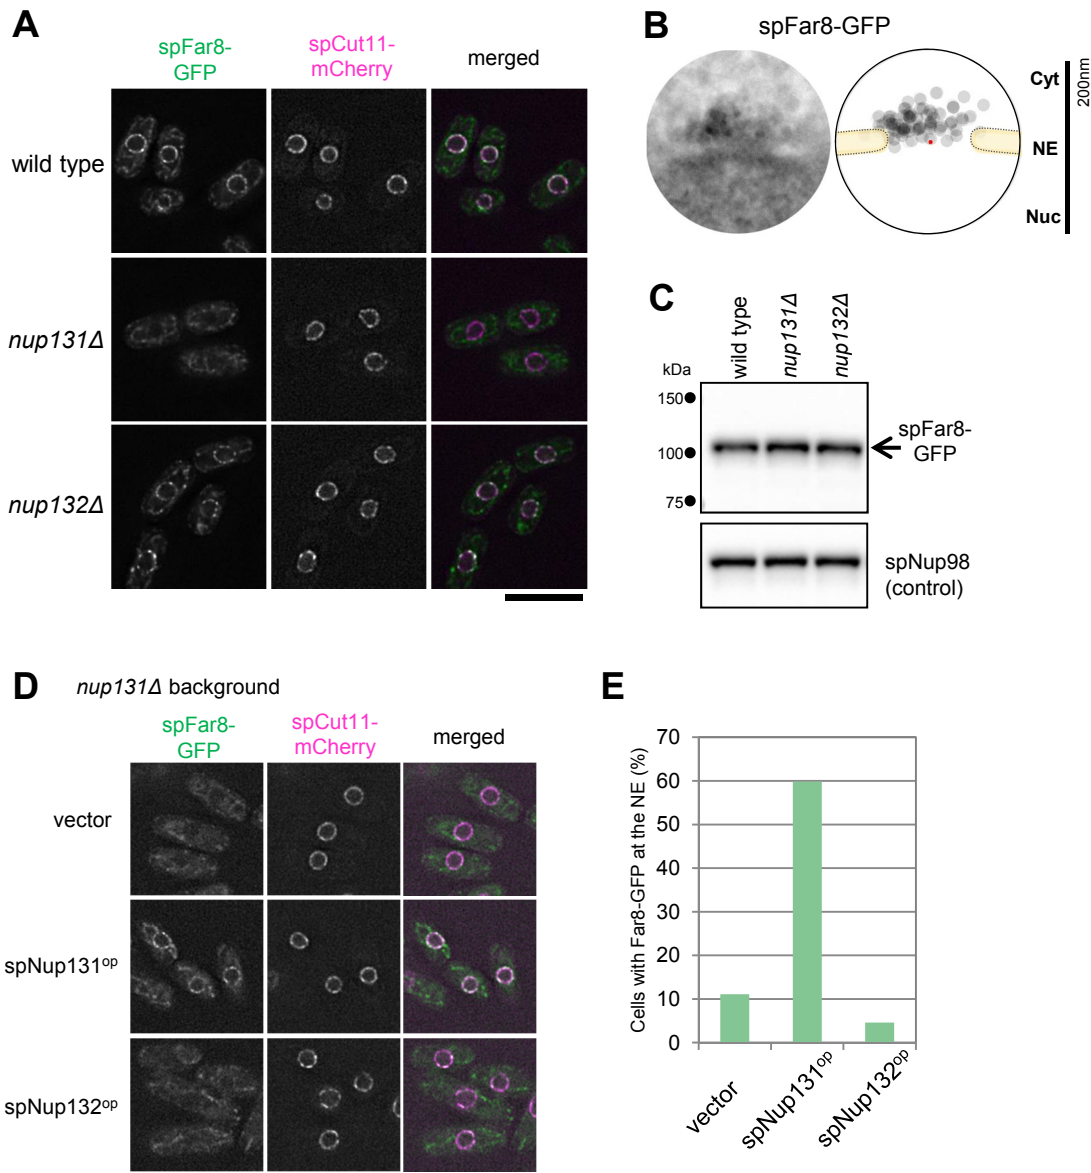

# Asakawa et al. Fig 3

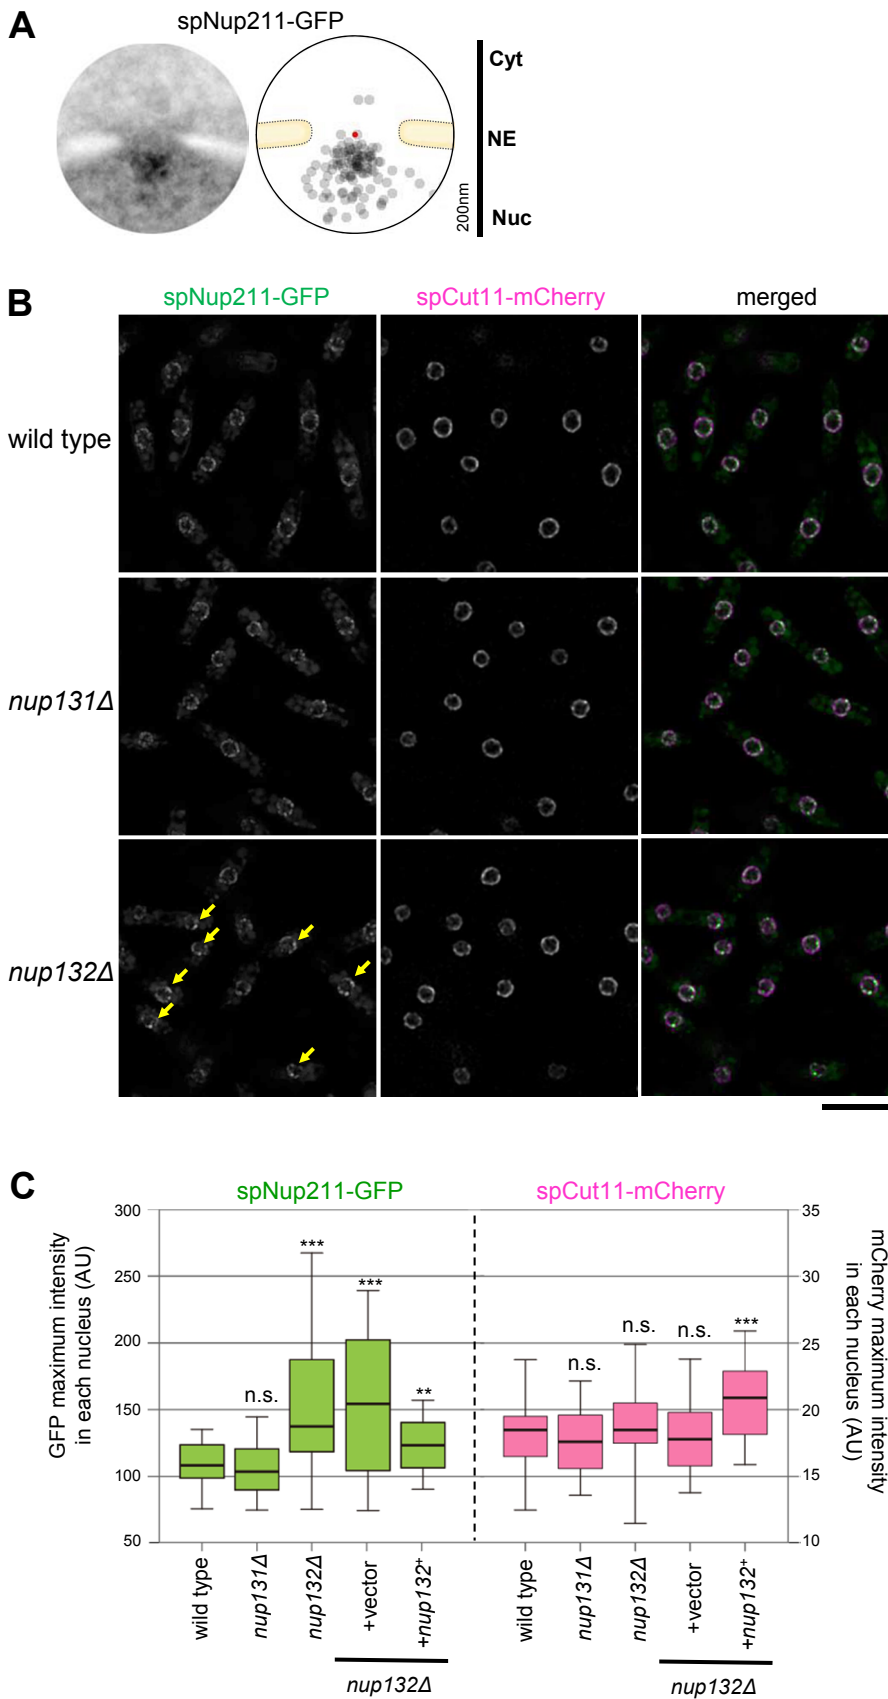

## Asakawa et al. Fig 4

### A Biased to cytoplasmic side

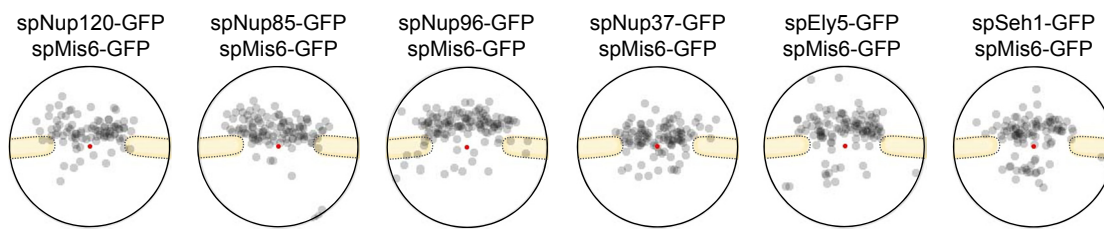

### Biased to nucleoplasmic side

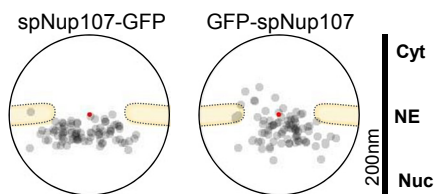

### B

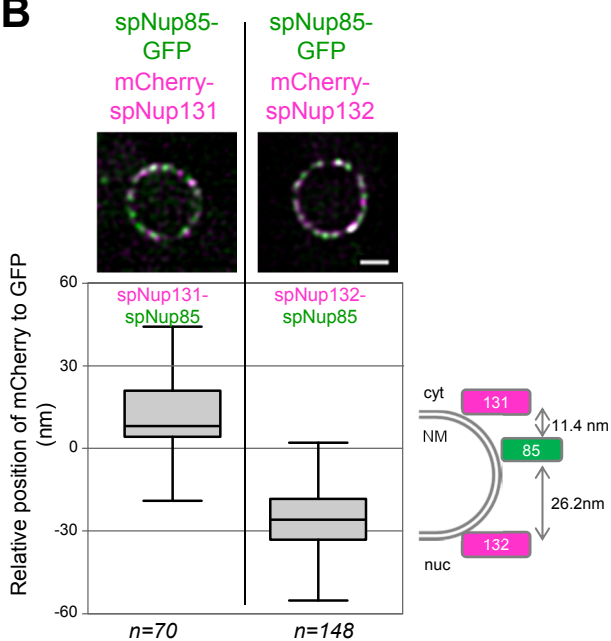

### C

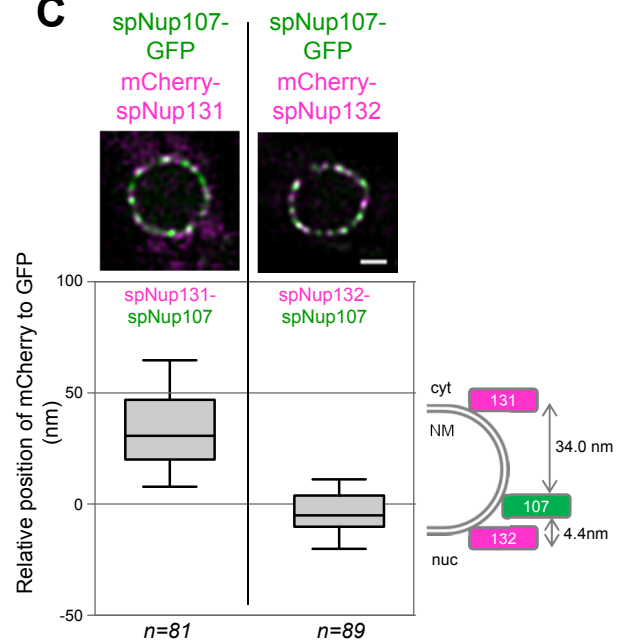

### D

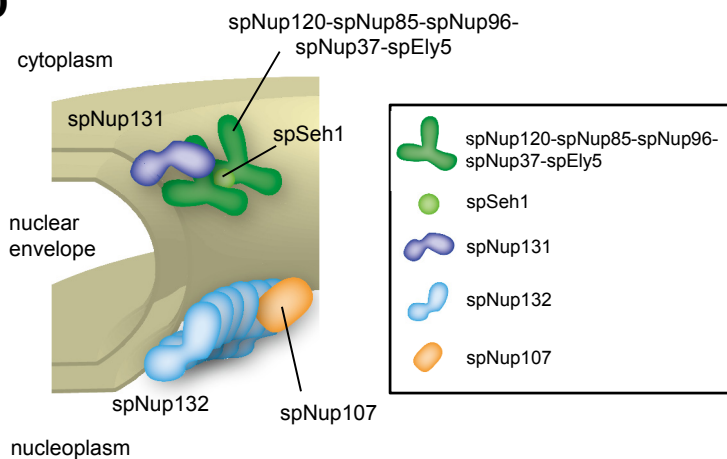

## Asakawa et al. Fig 5

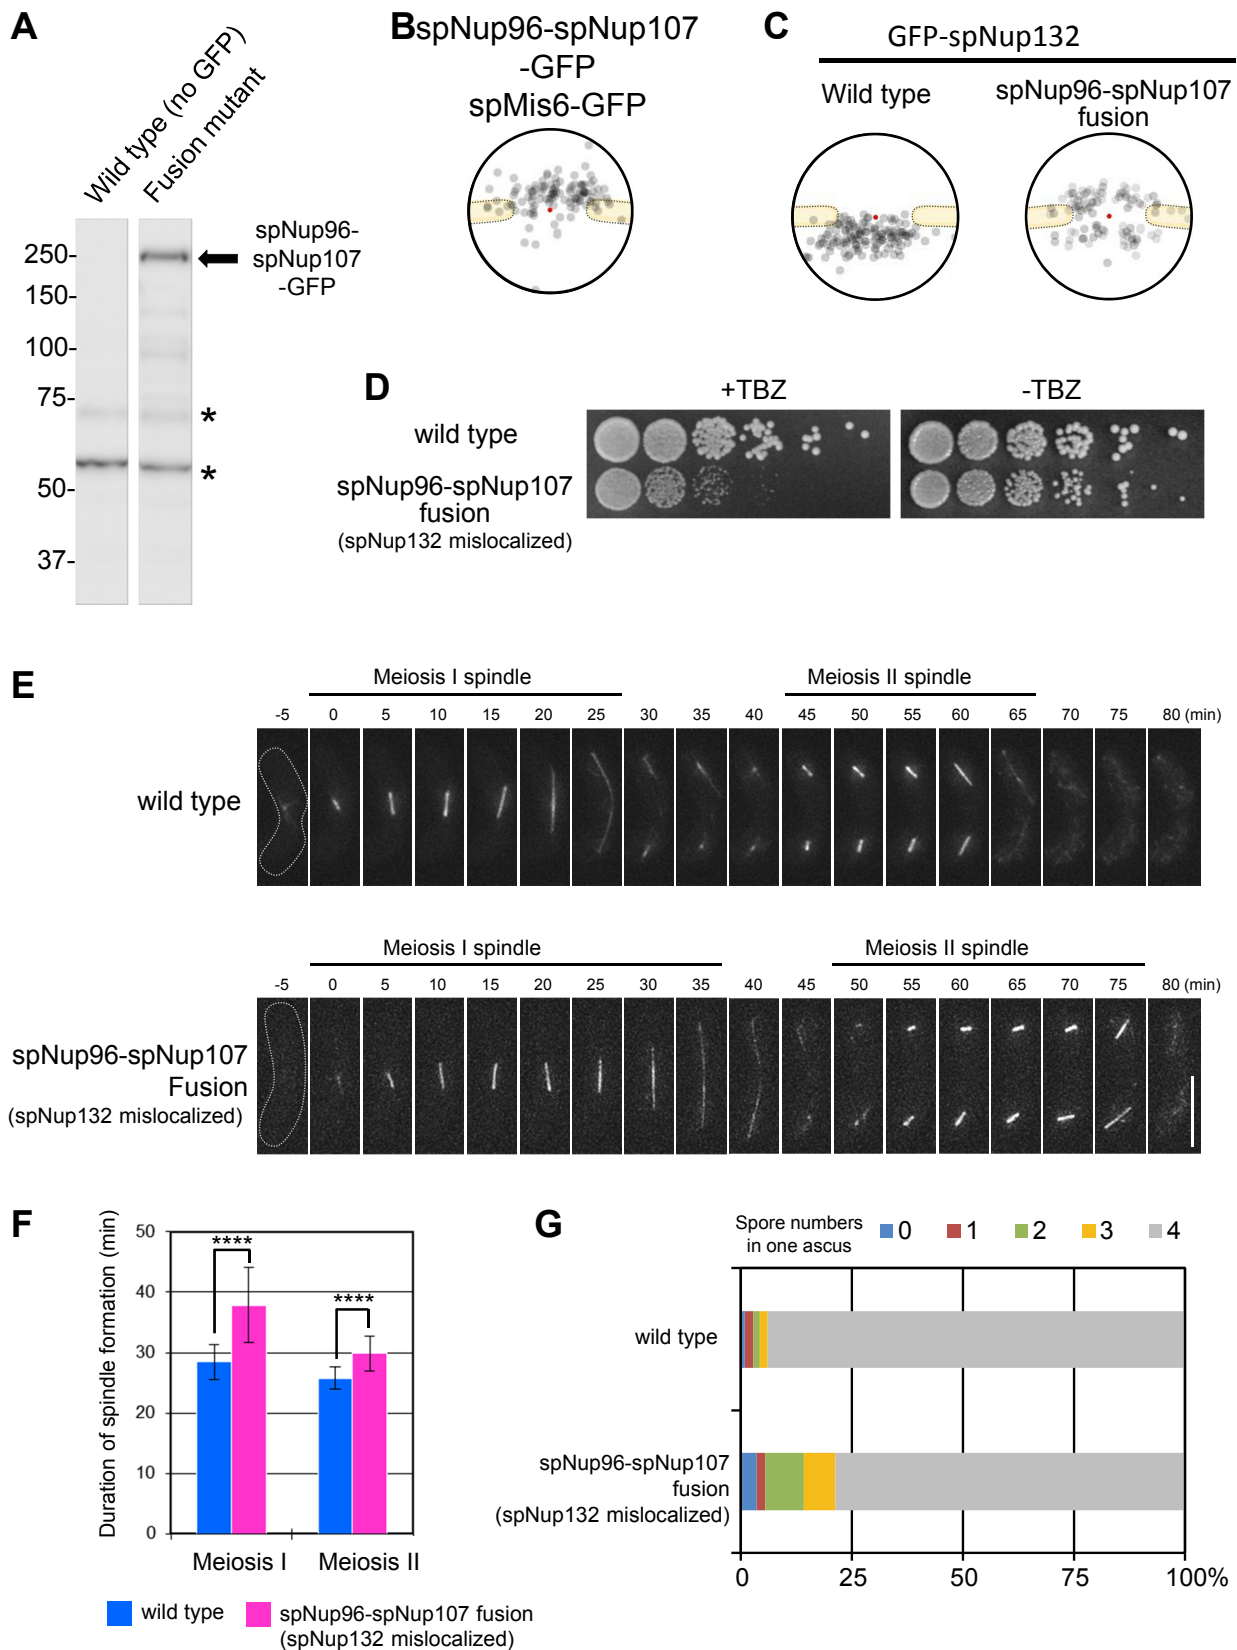



## Asakawa et al. Fig 6

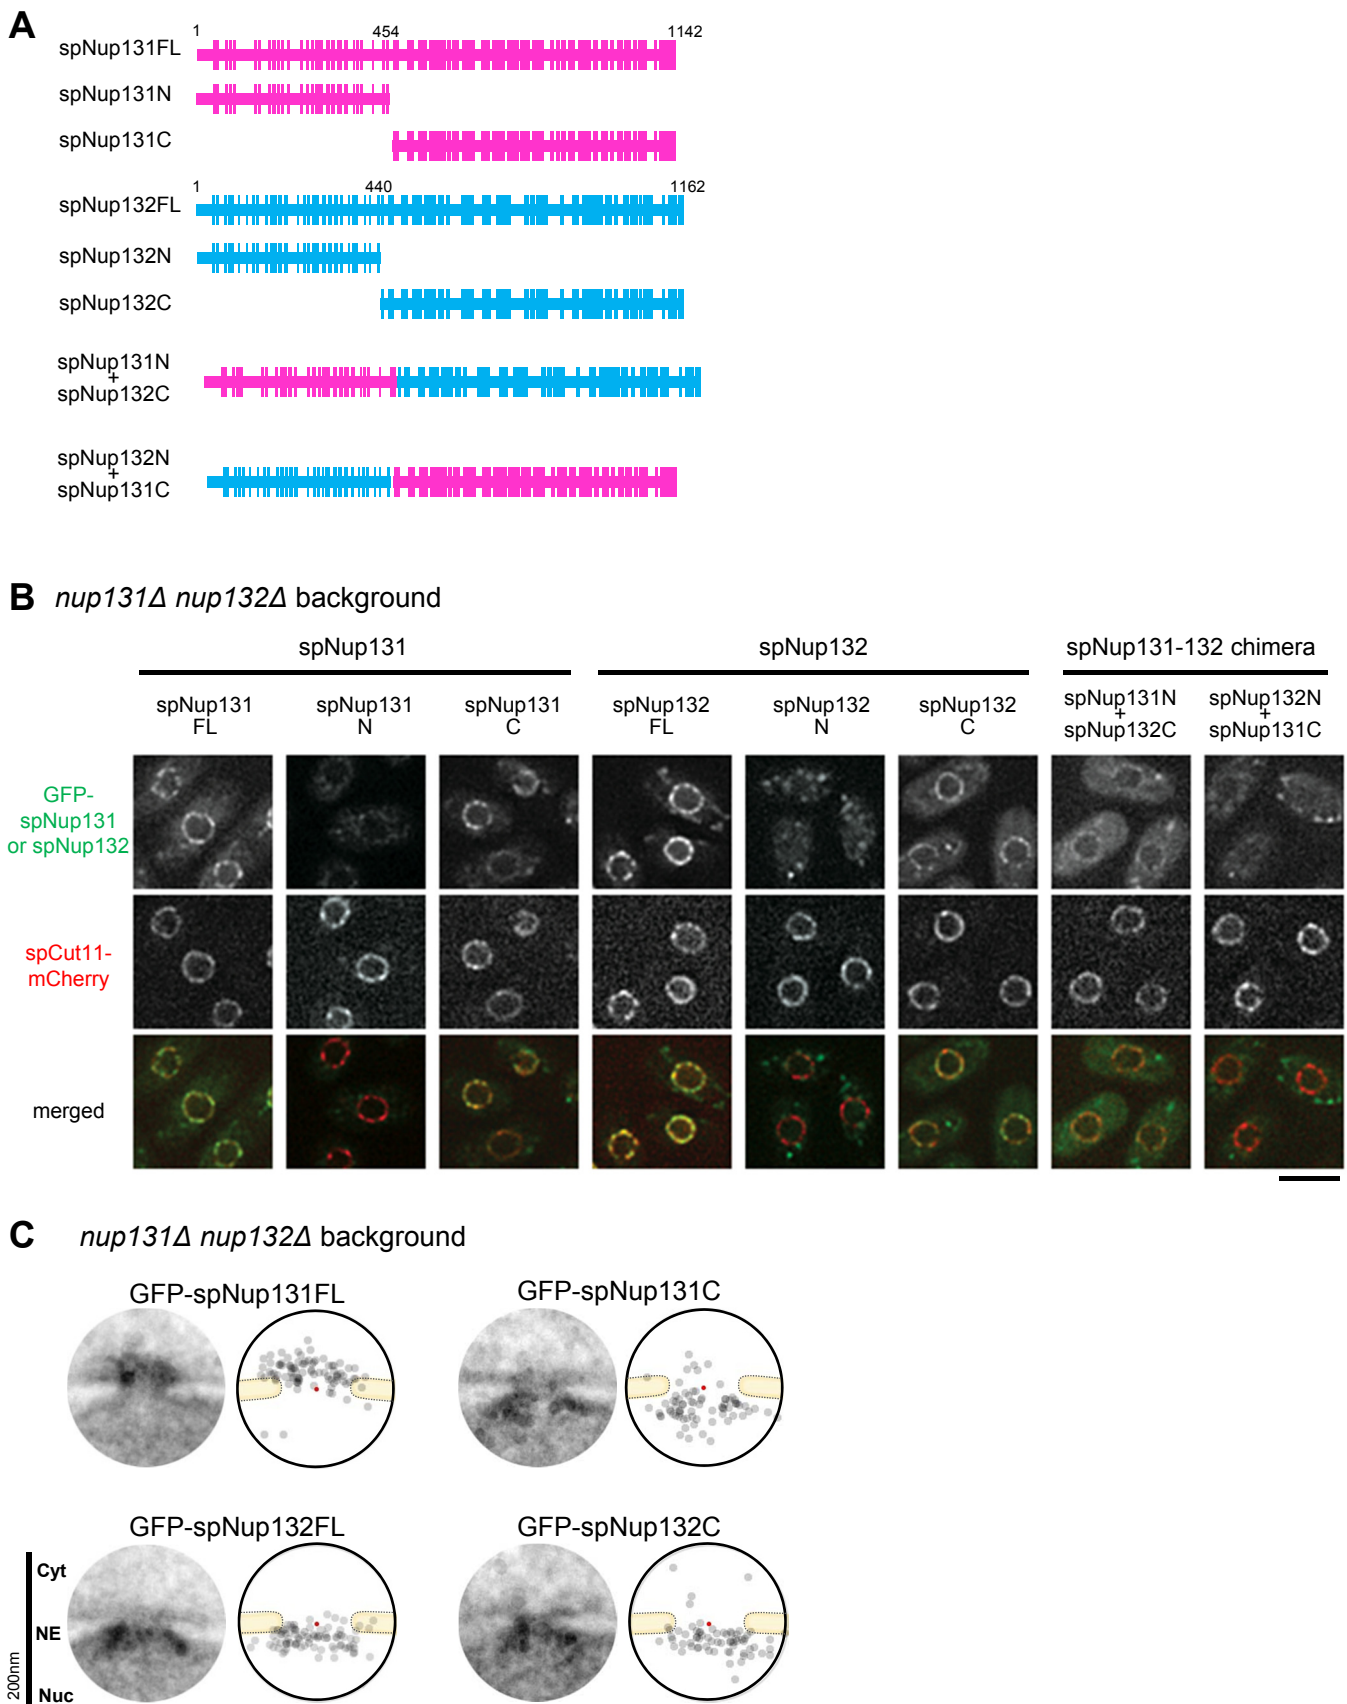

## Asakawa et al. Fig 7

### A Inner ring Nups

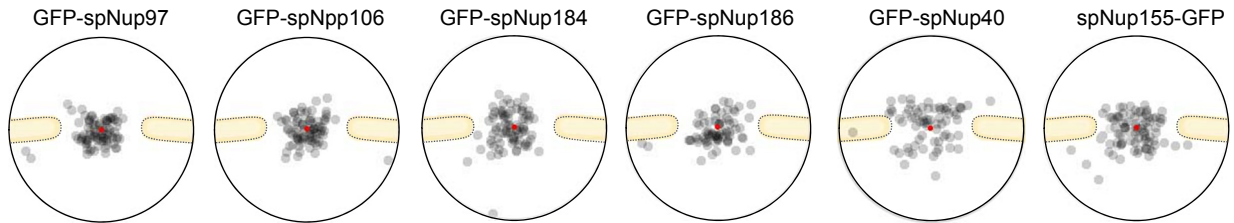

### B Channel Nups

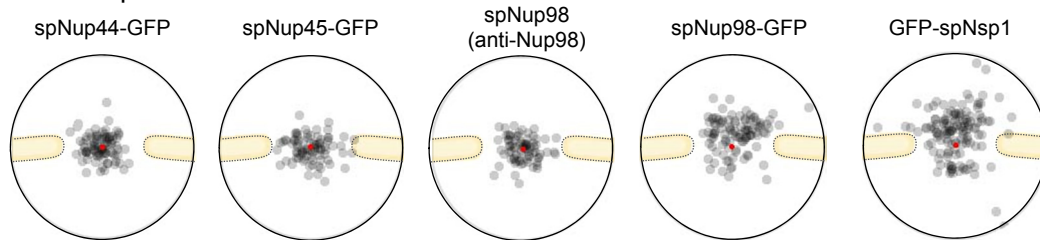

### C Cytoplasmic ring Nups

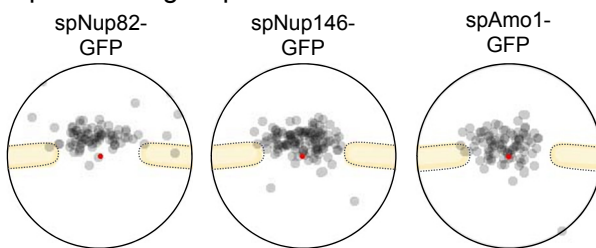

### D Transmembrane Nups

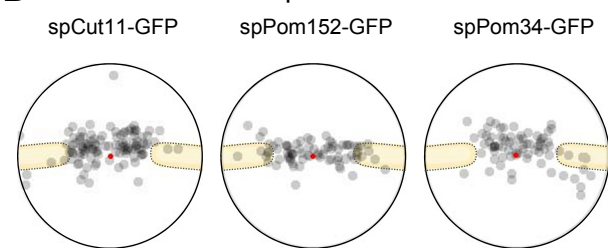

### E Nuclear basket Nups

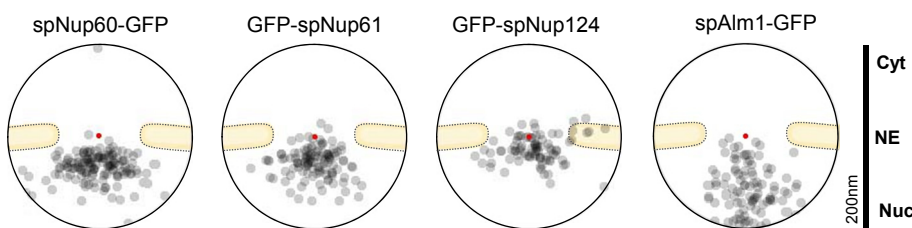



# Asakawa et al. Fig 8

**A**

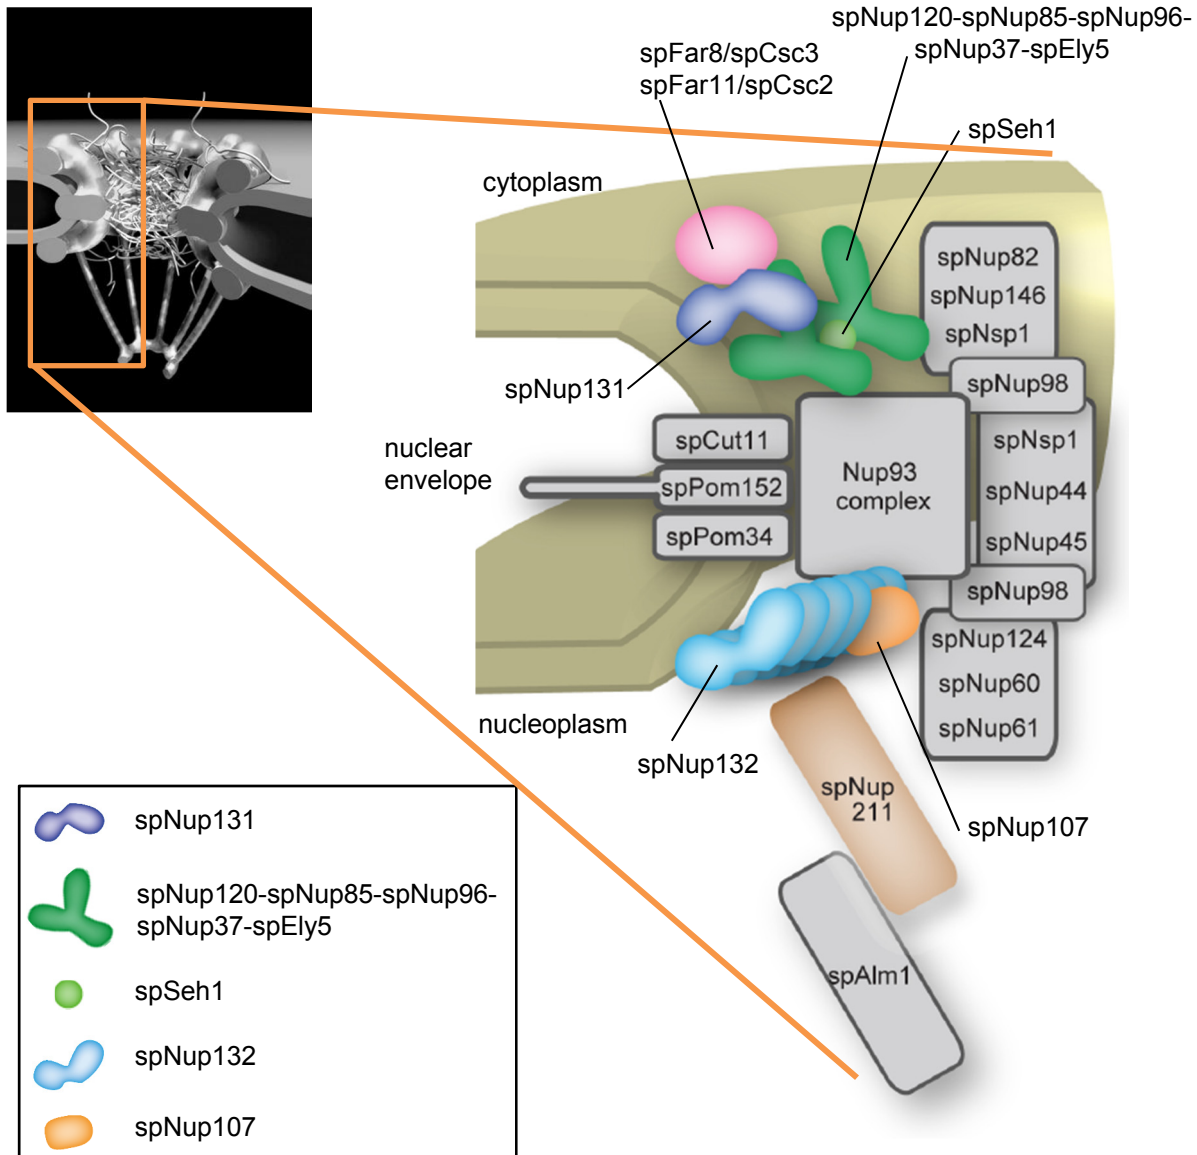

**B**

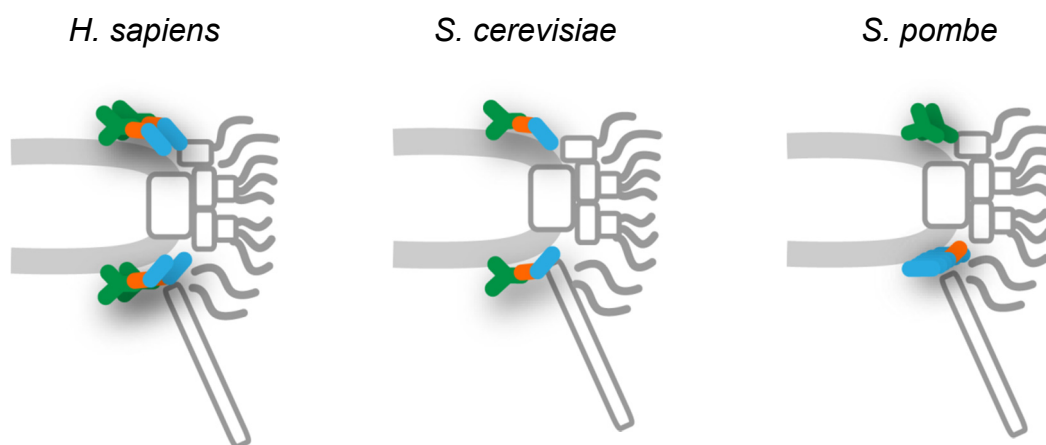

Source: https://www.biorxiv.org/content/10.1101/223131v4.full.pdf
